# Supplementary material for: Effect of a 6-month vegan low-carbohydrate (‘Eco-Atkins’) diet on cardiovascular risk factors and body weight in hyperlipidaemic adults: a randomised controlled trial
Source: PubMed Central journal article supplement — BMJ Open. 2014 Feb 5;4(2):e003505. doi: 10.1136/bmjopen-2013-003505 (PMC3918974; doi:10.1136/bmjopen-2013-003505), 2014-02-05
Supplement: bmjopen-2013-003505.draft_revisions.pdf [file bmjopen-2013-003505.draft_revisions.pdf]

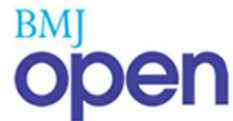

**Six Months of a Vegan Low-Carbohydrate (“Eco-Atkins”) Diet Improves Cardiovascular Risk Factors and Body Weight in Hyperlipidemic Adults: A Randomized Controlled Trial**

|                                 |                                                                                                                                                                                                                                                                                                                                                                                                                                                                                                                                                                                                                                                                                                                                                                                                                                                                                                                                               |
|---------------------------------|-----------------------------------------------------------------------------------------------------------------------------------------------------------------------------------------------------------------------------------------------------------------------------------------------------------------------------------------------------------------------------------------------------------------------------------------------------------------------------------------------------------------------------------------------------------------------------------------------------------------------------------------------------------------------------------------------------------------------------------------------------------------------------------------------------------------------------------------------------------------------------------------------------------------------------------------------|
| Journal:                        | <i>BMJ Open</i>                                                                                                                                                                                                                                                                                                                                                                                                                                                                                                                                                                                                                                                                                                                                                                                                                                                                                                                               |
| Manuscript ID:                  | bmjopen-2013-003505                                                                                                                                                                                                                                                                                                                                                                                                                                                                                                                                                                                                                                                                                                                                                                                                                                                                                                                           |
| Article Type:                   | Research                                                                                                                                                                                                                                                                                                                                                                                                                                                                                                                                                                                                                                                                                                                                                                                                                                                                                                                                      |
| Date Submitted by the Author:   | 16-Jul-2013                                                                                                                                                                                                                                                                                                                                                                                                                                                                                                                                                                                                                                                                                                                                                                                                                                                                                                                                   |
| Complete List of Authors:       | Jenkins, David; St. Michael's Hospital, Clinical Nutrition & Risk Factor Modification Center; University of Toronto, Nutritional Sciences<br>Wong, Julia; St. Michael's Hospital, Clinical Nutrition & Risk Factor Modification Center<br>Kendall, Cyril; St. Michael's Hospital, Clinical Nutrition & Risk Factor Modification Center<br>Esfahani, Amin; St. Michael's Hospital, Clinical Nutrition & Risk Factor Modification Center<br>Ng, Vivian; St. Michael's Hospital, Clinical Nutrition & Risk Factor Modification Center<br>Leong, Tracy; University of Toronto, Nutritional Sciences<br>Faulkner, Dorothea; St. Michael's Hospital, Clinical Nutrition & Risk Factor Modification Center<br>Vidgen, Ed; St. Michael's Hospital, Clinical Nutrition & Risk Factor Modification Center<br>Paul, Gregory; Solae LLC,<br>Mukherjea, Ratna; Solae LLC,<br>Krul, Elaine; Solae LLC,<br>Singer, William; St. Michael's Hospital, Medicine |
| <b>Primary Subject Heading</b>: | Nutrition and metabolism                                                                                                                                                                                                                                                                                                                                                                                                                                                                                                                                                                                                                                                                                                                                                                                                                                                                                                                      |
| Secondary Subject Heading:      | Cardiovascular medicine                                                                                                                                                                                                                                                                                                                                                                                                                                                                                                                                                                                                                                                                                                                                                                                                                                                                                                                       |
| Keywords:                       | weight loss, diet, hyperlipidemia                                                                                                                                                                                                                                                                                                                                                                                                                                                                                                                                                                                                                                                                                                                                                                                                                                                                                                             |
|                                 |                                                                                                                                                                                                                                                                                                                                                                                                                                                                                                                                                                                                                                                                                                                                                                                                                                                                                                                                               |

SCHOLARONE™  
Manuscripts

1  
2  
3  
4  
5  
6  
7  
8  
9  
10  
11  
12  
13  
14  
15  
16  
17  
18  
19  
20  
21  
22  
23  
24  
25  
26  
27  
28  
29  
30  
31  
32  
33  
34  
35  
36  
37  
38  
39  
40  
41  
42  
43  
44  
45  
46  
47  
48  
49  
50  
51  
52  
53  
54  
55  
56  
57  
58  
59  
60

# Six Months of a Vegan Low-Carbohydrate (“Eco-Atkins”) Diet Improves Cardiovascular Risk Factors and Body Weight in Hyperlipidemic Adults: A Randomized Controlled Trial

David JA Jenkins, MD<sup>1-5</sup> Julia MW Wong, PhD<sup>1,4</sup> Cyril WC Kendall, PhD<sup>1,4</sup> Amin Esfahani,  
MSc<sup>1,4</sup> Vivian WY Ng, RD<sup>1,4</sup> Tracy CK Leong, BSc<sup>1,4</sup> Dorothea A Faulkner, PhD<sup>1,4</sup> Ed  
Vidgen, BSc<sup>1,4</sup> Gregory Paul, PhD<sup>6</sup> Ratna Mukherjea, PhD<sup>6</sup> Elaine S. Krul, PhD<sup>6</sup> William  
Singer, MD<sup>1,2,4,5</sup>

<sup>1</sup>Clinical Nutrition & Risk Factor Modification Center, St. Michael’s Hospital, Toronto, Ontario,  
Canada; <sup>2</sup>Department of Medicine, Division of Endocrinology and Metabolism, <sup>3</sup>Li Ka Shing  
Knowledge Institute, St. Michael’s Hospital, Toronto, Ontario, Canada; Departments of  
<sup>4</sup>Nutritional Sciences, <sup>5</sup>Medicine, Faculty of Medicine, University of Toronto, Toronto, Ontario,  
Canada; <sup>6</sup>Solae LLC, St. Louis, Missouri, USA

JMWW current affiliation is the New Balance Foundation Obesity Prevention Center, Boston Children’s  
Hospital, Boston, MA, USA, and Department of Pediatrics, Harvard Medical School, Boston, MA, USA.

AE current affiliation is New York Medical College, School of Medicine, Valhalla, NY, USA.

Address correspondence and reprint requests to David JA Jenkins, Clinical Nutrition and Risk  
Factor Modification Center, St. Michael’s Hospital, 61 Queen St. East, Toronto, Ontario,  
CANADA, M5C 2T2. Phone: (416) 978-4752; Fax: (416) 978-5310; EM:

[cyril.kendall@utoronto.ca](mailto:cyril.kendall@utoronto.ca)

**Manuscript Word Count: 3,188**

1  
2  
3 **Number of Tables:** 3

4  
5  
6 **Number of Figures:** 3

7  
8 **Number of References:** 59

9  
10 **Running Title:** Weight loss in hyperlipidemia on a vegan diet

11  
12 **Trial Registration:** #NCT00256516

13  
14  
15 **Keywords:** weight loss, vegetable proteins, nuts, soy, vegan diet, hyperlipidemia

16  
17  
18  
19  
20 **Contributions**

21  
22 *Conception and design* - Jenkins, Wong, Kendall, Faulkner, Paul, Mukherjea, Krul, Singer

23  
24 *Acquisition of data* - Jenkins, Wong, Kendall, Esfahani, Ng, Leong

25  
26 *Analysis and interpretation of data* – Jenkins, Wong, Kendall, Vidgen

27  
28 *Drafting of the manuscript* – Jenkins, Wong

29  
30 *Critical revision of the manuscript for important intellectual content* – Jenkins, Wong, Kendall,

31  
32 Esfahani, Ng, Leong, Faulkner, Vidgen, Paul, Mukherjea, Krul, Singer

33  
34 *Statistical analysis* - Vidgen

35  
36 *Obtaining funding* – Jenkins, Kendall, Wong

37  
38 *Administrative, technical, or material support* – Wong, Kendall, Esfahani, Ng, Leong, Faulkner

39  
40 *Supervision* – Jenkins, Kendall, Wong, Singer

41  
42  
43  
44 *No additional contributions* - Paul, Mukherjea, Krul

## Abstract

**Objective:** Low-carbohydrate diets may be useful for weight loss. Diets high in vegetable proteins and oils may reduce the risk of coronary heart disease (CHD). The main objective was to determine the longer term effect of a diet that was both low-carbohydrate and plant-based on weight loss and LDL-C.

**Design, Setting, Participants:** A parallel design study of 39 overweight hyperlipidemic men and postmenopausal women conducted at a Canadian university-affiliated hospital nutrition research center from April 2005 to November 2006.

**Intervention:** Participants were advised to consume either a low-carbohydrate vegan diet or a high-carbohydrate lacto-ovo vegetarian diet for six-months after completing one-month metabolic (all foods provided) versions of these diets. The prescribed macronutrient intakes for the low- and high-carbohydrate diets were: 26% and 58% of energy from carbohydrate, 31% and 16% from protein and 43% and 25% from fat, respectively.

**Primary Outcome:** Change in body weight.

**Results:** Twenty-three participants (50% test, 68% control) completed the six-month ad libitum study. The approximate 4kg weight loss on the metabolic study was increased to -6.9kg on low-carbohydrate and -5.8kg on high-carbohydrate six-month ad libitum treatments (treatment difference [95% CI]: -1.1kg [-2.1, 0.0],  $P=0.047$ ). The relative LDL-C and triglyceride reductions were also greater on the low-carbohydrate treatment (treatment difference [95% CI]: -0.49mmol/L [-0.70, -0.28],  $P<0.001$  and -0.34mmol/L [-0.57, -0.11],  $P=0.005$ , respectively), as were the TC:HDL-C and apolipoprotein B:A1 ratios (-0.57 [-0.83, -0.32],  $P<0.001$  and -0.05 [-0.09, -0.02],  $P=0.003$ , respectively).

1  
2  
3 **Conclusions:** A self-selected low-carbohydrate vegan diet, containing increased protein and fat  
4  
5 from gluten and soy products, nuts, and vegetable oils, had lipid lowering advantages over a  
6  
7 high-carbohydrate, low-fat weight loss diet, thus improving heart disease risk factors.  
8  
9

10  
11  
12 **Trial Registration:** clinicaltrials.gov (<http://www.clinicaltrials.gov/>), #NCT00256516  
13  
14

15  
16  
17 **Abstract Word Count:** 273 (up to 300 allowed)  
18  
19  
20  
21  
22  
23  
24  
25  
26  
27  
28  
29  
30  
31  
32  
33  
34  
35  
36  
37  
38  
39  
40  
41  
42  
43  
44  
45  
46  
47  
48  
49  
50  
51  
52  
53  
54  
55  
56  
57  
58  
59  
60

## Article Summary

### Article Focus

- Low-carbohydrate diets may be useful for weight loss. Diets high in vegetable proteins and oils may reduce the risk of coronary heart disease (CHD).
- The objective of the randomized clinical trial was to determine the longer term effect of a diet that was both low-carbohydrate and plant-based on weight loss and LDL-C.
- We have already reported the effect of this dietary strategy in producing a difference of 8% in LDL-C reduction between calorie-restricted diets (60% of estimated calorie requirements) when all food was provided. We now report findings after these same participants continued on their respective diets for an additional 6 months, under self-selected conditions, in order to gain insights into the real life effectiveness of this diet.

### Key Messages

- By comparison with the high-carbohydrate diet, consumption of the low-carbohydrate diet containing vegetable proteins and oils was also associated with significantly reduced concentrations of LDL-C. This LDL-C reduction has not been reported for other low-carbohydrate diet studies in which a large part of the protein and fat originated from animal sources and where increases in LDL-C were seen.
- The present study also demonstrated that consumption of a low-carbohydrate vegan diet resulted in modestly greater body weight reductions compared to a high-carbohydrate diet (7% versus 6% reductions, respectively) over a six-month ad libitum period.

- 1  
2  
3 - The sustained reduction in LDL-C, associated with only a small incremental weight loss on  
4 the 6-month self-selected diet, is a potentially important attribute of the diet in reducing long-  
5 term CHD risk  
6  
7  
8  
9

### 10 11 12 **Strengths and Limitations of this Study**

13  
14  
15 The study weaknesses include the relatively small sample size and the high dropout rate.

16  
17 Nevertheless, high dropout rates have been reported in similar dietary studies and it is  
18 noteworthy that attrition rates were low in the metabolic study when all food was provided [1].

19  
20 Food availability and preparation may therefore be important factors. For those who did  
21 complete the study, however, there were benefits in weight loss and LDL-C reduction, an  
22 additional 2% advantage in body weight reduction compared to the high-carbohydrate diet and a  
23 13% drop in LDL-C for participants consuming a more plant-based low-carbohydrate diet.  
24  
25  
26  
27  
28

29  
30 The study's strength is that the prescribed hypocaloric diet was self-selected, meaning the results  
31 are more in line with what can be expected under free-living conditions. The breadth of  
32 application of the plant-based low-carbohydrate diet, however, remains to be determined, but it  
33 may provide an option for some individuals for whom LDL-C reduction is an equal concern to  
34 weight loss. If low-carbohydrate dietary options become more generally available the number of  
35 individuals who will benefit is likely to increase.  
36  
37  
38  
39  
40  
41  
42  
43  
44  
45  
46  
47  
48  
49  
50  
51  
52  
53  
54  
55  
56  
57  
58  
59  
60

## Introduction

Many popular weight loss diets emphasize carbohydrate restriction (Atkins, Eddies, South Beach, Zone). Their success is determined by the level of compliance with the prescribed diets [2-7]. However, a high content of animal products, rich in saturated fat and cholesterol, may make conventional low-carbohydrate diets less appropriate for those with hypercholesterolemia [3 8]. Even during active weight loss, these high saturated fat diets, may raise serum LDL-C above baseline [3 8] and there is concern that if such diets continue to be eaten when weight loss has ceased, a more atherogenic blood lipid profile may result [9]. These concerns have prompted exploration of other weight loss strategies, but only modest reductions in LDL-C have been observed [10].

By contrast vegan diets significantly lower LDL-C [11]. Trials of vegan and vegetarian diets also reduce progression of coronary heart disease (CHD) [12] and improve diabetes control [13].

Plant food components such as vegetable proteins, vegetable oils, nuts and viscous fibers, reduce serum lipids in many studies [14-19] and may increase flow mediated vasodilatation [20-23].

Nuts, fiber and vegetarian diets in general, all reduce CHD and diabetes in cohort studies [24-29]. Finally, in cohort studies, low-carbohydrate diets, high in vegetable oils and proteins as opposed to animal products, reduce CHD events and diabetes incidence in women [30 31], while lower red meat intake reduces total, cardiovascular and cancer mortality [32]. Most recently a large randomized controlled trial confirmed the effect of nuts and increased vegetable oil (olive oil) intake in reducing cardiovascular events in the context of a Mediterranean diet [33].

In view of the apparent success of low-carbohydrate diets for weight loss and the demonstration that relatively high-carbohydrate vegetarian and vegan diets, and diets low in animal products, lower CHD risk factors [34-37], we designed a diet that combined both vegan and low-



1  
2  
3 carbohydrate elements to determine whether such a diet captured both the weight loss and CHD  
4 risk reduction advantages. We have already reported the effect of this dietary strategy in  
5 producing a difference of 8% in LDL-C reduction between calorie-restricted diets (60% of  
6 estimated calorie requirements) when all food was provided [1]. We now report findings after  
7 these same participants continued on their respective diets for an additional 6 months, under self-  
8 selected conditions, in order to gain insights into the real life effectiveness of this diet. The  
9 results of the metabolic (all foods provided) study have been reported previously and had  
10 demonstrated a CHD risk factor advantage, but with no greater weight loss than the control diet  
11 [1].  
12  
13  
14  
15  
16  
17  
18  
19  
20  
21  
22  
23  
24  
25  
26

## 27 **Methods**

### 28 **Participants**

29  
30 Forty-seven overweight participants, recruited by newspaper advertisement and hospital clinic  
31 notices, undertook the one-month metabolic first phase of the study (Figure 1) that has been  
32 previously reported [1]. On completion of this phase, thirty-nine participants (19 control and 20  
33 test participants) continued for an ad libitum six-month study (Table 1). The study was  
34 conducted at a Canadian university-affiliated hospital nutrition research center from April 2005  
35 to November 2006. All participants had high normal to raised LDL-C levels ( $>3.4\text{mmol/L}$  at  
36 diagnosis) and a body mass index  $> 27\text{ kg/m}^2$ . Details of the eligibility criteria have been  
37 previously reported [1]. After recruitment, 11/39 participants discontinued lipid lowering  
38 medications at least two weeks prior to starting and for the study duration (Table 1).  
39  
40  
41  
42  
43  
44  
45  
46  
47  
48  
49  
50  
51  
52  
53  
54

### 55 **Study Protocol**

1  
2  
3 The intervention was a randomized parallel study stratified by sex in which participants were  
4  
5 randomized to either low- or high-carbohydrate, calorie-reduced diets. The first month was the  
6  
7 previously reported metabolically controlled study [1]. For the following six-months, participants  
8  
9 continued on the diet to which they had been assigned as a self-selected (ad libitum) diet.  
10  
11

12 Anthropometric, blood pressure and blood lipid measurements were repeated at monthly  
13  
14 intervals. Insulin and HbA1c were measured at baseline and at the start and end of the ad libitum  
15  
16 treatment. Percentage body fat was measured at baseline and end of the ad libitum treatment by  
17  
18 bioelectrical impedance (Quantum II; RJL Systems, Clinton Township, Michigan). Seven-day  
19  
20 diet and exercise histories were recorded in the week prior to each visit and discussed with the  
21  
22 dietitian to enhance adherence. Alterations in exercise were allowed and recorded.  
23  
24  
25

26 The Ethics Committees of St. Michael's Hospital and the University of Toronto, and the  
27  
28 Therapeutic Products Directorate of Health Canada approved the study. Written informed  
29  
30 consent was obtained from the participants. The study's clinical trial registration number was  
31  
32 #NCT00256516.  
33  
34  
35

### 36 37 38 **Diets**

39  
40 As with the previous metabolic study, participants were encouraged to eat only 60% of the  
41  
42 estimated caloric requirements to maintain a stable body weight [38-40]. The prescribed test diet  
43  
44 was a low-carbohydrate vegan diet containing 26% of calories from carbohydrate, 31% of  
45  
46 calories from vegetable proteins and 43% from fat (primarily vegetable oils). The control, high-  
47  
48 carbohydrate diet (58% carbohydrate, 16% protein and 25% fat) emphasized whole wheat  
49  
50 cereals and cereal fiber. Details of the diets have been published previously [1]. Carbohydrate  
51  
52 sources on the low-carbohydrate diet featured viscous fiber-containing foods (such as oats and  
53  
54  
55  
56  
57  
58  
59  
60

1  
2  
3 barley) and low-starch vegetables (emphasizing okra and eggplant) for the relatively limited  
4 amount of carbohydrate allowed. Participants were able to purchase at the research center the  
5 “no” starch high protein nut bread and three of the seitan (wheat gluten) products used in the  
6 study which were not available in Canada.  
7  
8  
9  
10  
11

12 Self-taring electronic scales (My Weigh Scales, Vancouver, BC or Tanita Corporation, Arlington  
13 Heights, IL) were provided to all participants and they were instructed to weigh all food items  
14 while recording the seven-day food diary in the week prior to clinic visits. Adherence was  
15 assessed from the completed seven-day food records. Neither the dietitians nor participants could  
16 be blinded, but equal emphasis was placed on the potential importance for health of both diets.  
17 The analytical technicians were blinded to diet allocation, as was the statistician, up to analysis  
18 of the primary outcome. Participants were offered no financial compensation for participation in  
19 the study.  
20  
21  
22  
23  
24  
25  
26  
27  
28  
29  
30  
31  
32  
33

### 34 **Analyses**

35  
36 The analytical techniques have been reported previously [1]. Serum was analyzed according to  
37 the Lipid Research Clinics protocol in the J. Alick Little Lipid Research Laboratory [35] and  
38 LDL-C (in mmol/L) was calculated by the method of Friedewald et al. [1]. The methods for  
39 analyzing apolipoproteins A1 and B, high sensitivity C-reactive protein (hs-CRP), blood  
40 glucose, insulin, HbA1c, and homeostasis model assessment – insulin resistance model (HOMA-  
41 IR) have been described previously [1]. Exercise data were calculated as metabolic equivalents  
42 (METs) [41]. The absolute 10-year CHD risk score was calculated using the Framingham risk  
43 equation [42].  
44  
45  
46  
47  
48  
49  
50  
51  
52  
53  
54  
55  
56  
57  
58  
59  
60

1  
2  
3 Diets were assessed for macronutrients, fatty acids, cholesterol and fiber using a computer  
4  
5 program based on the USDA database [43] and developed in our laboratory to allow the addition  
6  
7 of the macronutrient content of study foods obtained from food labels or directly from food  
8  
9 manufacturers.

10  
11  
12 Adherence with the three principal cholesterol-lowering components [vegetable proteins (soy  
13  
14 and gluten), nuts, and viscous fibers] of the low-carbohydrate diet was estimated from the 7-day  
15  
16 food records by applying 33.3% adherence factor to the recorded intake for each of the three  
17  
18 main components. The sum of the three components if consumed as prescribed would equal  
19  
20 100% adherence.  
21  
22  
23  
24  
25  
26

### 27 **Statistical Analyses**

28  
29 Results are expressed as means  $\pm$  SEM or 95% confidence intervals (CIs). Time zero was used as  
30  
31 the baseline and refers to the pre-metabolic study baseline [1]. Treatment differences in physical  
32  
33 and biochemical measures were assessed using all available data and a repeated measures mixed  
34  
35 model accounting for time of assessment (SAS 9.2) [44] in the Tables (Table 2 and 3) and the  
36  
37 Results. The response variable was change from baseline, with diet and week as fixed effects and  
38  
39 subject ID nested in diet. There was no adjustment for baseline. Any participant who started the  
40  
41 ad libitum treatment was included in the analysis (N=39).  
42  
43  
44

45  
46 Multiple imputation (taking the mean of 5 sets of randomly imputed values) was used to present  
47  
48 baseline and treatment values in the Tables (2 and 3) and Figures (2 and 3) by generating data for  
49  
50 those who dropped out or had missing values [44].  
51  
52  
53  
54

### 55 **Results**

1  
2  
3 Compliance with the major dietary components [vegetable proteins (soy and gluten), nuts, and  
4 viscous fibers] was 33.6% or one-third of that prescribed during the metabolic phase (Table 2).  
5  
6 Saturated fat intakes were similar on both treatments whereas intake of monounsaturated fats,  
7  
8 vegetable proteins, and soy protein were significantly higher on the low-carbohydrate diet (Table  
9  
10 2). Available carbohydrate intake was significantly lower on the low-carbohydrate diet (Table 2).  
11  
12 The dropout rate was 35% (7/20) on the low-carbohydrate and 26% (5/19) on the high-  
13  
14 carbohydrate (Figure 1). Three participants were withdrawn by the study physician due to failure  
15  
16 to attain LDL-C targets on the low-carbohydrate diet (mean LDL-C = 5.24mmol/L) and one  
17  
18 subject on the high-carbohydrate diet (LDL-C = 7.78mmol/L). Participants on the low-  
19  
20 carbohydrate diet tended to have larger reductions in body weight over time (Figure 2). The  
21  
22 weight loss from baseline to the end of the 6-month ad libitum treatment was -6.9kg [95% CI, -  
23  
24 7.7, -6.1] on the low-carbohydrate and -5.8kg [95% CI, -6.6, -5.1] on the control diet with a  
25  
26 significant difference between groups (treatment difference [95% CI]: -1.1kg [-2.1, 0.0];  
27  
28 P=0.047) (Table 3). The final reduction in BMI was also greater on the low-carbohydrate versus  
29  
30 high-carbohydrate diet (treatment difference [95% CI]: -0.4kg/m<sup>2</sup> [-0.8, 0.0]; P=0.039) (Table 3).  
31  
32 There was a relative increase in recorded exercise by the high-carbohydrate diet participants,  
33  
34 whereas there was no relative change in the low-carbohydrate participants (treatment difference  
35  
36 [95% CI]: -9.3 [-16.4, -2.2] METs; P=0.012), but this was not reflected in a greater weight loss  
37  
38 (Table 3). There were no treatment differences in percent body fat, waist circumference or satiety  
39  
40 (Table 3).  
41  
42  
43  
44  
45  
46  
47  
48  
49  
50  
51  
52

### 53 Lipids

54  
55  
56  
57  
58  
59  
60

1  
2  
3 At the end of the study, the reduction on the low-carbohydrate versus high-carbohydrate diet was  
4 greater for LDL-C (treatment difference [95% CI]: -0.49mmol/L [-0.70, -0.28]; P<0.001, for TC  
5 (-0.62mmol/L [-0.86, -0.37]; P<0.001, for TC:HDL-C -0.57 [-0.83, -0.32]; P<0.001, for LDL-  
6 C:HDL-C (-0.42 [-0.60, -0.24]; P<0.001, and for triglycerides (-0.34mmol/L [-0.57, -0.11];  
7  
8 P=0.005). No treatment difference was seen in HDL-C (Table 3). Values for LDL-C and the  
9  
10 TC:HDL-C ratio were consistently lower in participants on the low-carbohydrate diet throughout  
11  
12 the study while HDL-C values were not different from baseline (Figure 3 A-C).  
13  
14  
15  
16  
17  
18  
19  
20  
21

### 22 **Apolipoproteins**

23  
24 ApoB and the ApoB:A1 ratio were reduced more on the low- versus the high-carbohydrate diet  
25 at the end of the study (treatment different [95% CI]: -0.11g/L [-0.16, -0.06]; P<0.001 and -0.05  
26 [-0.09, -0.02]; P=0.003, respectively) (Table 3). No significant difference between the diets was  
27  
28 observed for ApoA1 concentrations. Figure 3D and 3F show that the low-carbohydrate diet  
29  
30 resulted in lower apoB and ApoB:ApoA1 ratio relative to baseline over the course of the study.  
31  
32  
33  
34  
35  
36  
37  
38

### 39 **C-Reactive Protein, HbA1c, Blood Glucose, Serum Insulin, Insulin Resistance and Blood** 40 **Pressure**

41  
42 Both treatments reduced hs-CRP with no difference between treatments (Table 3). HbA1c,  
43  
44 fasting blood glucose, insulin, and insulin resistance (calculated using the HOMA model) fell  
45  
46 similarly on both treatments during the course of the study (Table 3). Systolic and diastolic blood  
47  
48 pressure decreased similarly with no treatment differences (Table 3).  
49  
50  
51  
52  
53  
54

### 55 **Calculated CHD Risk**

1  
2  
3 The low-carbohydrate diet significantly reduced the calculated 10-year CHD risk relative to the  
4 high-carbohydrate diet (2% [-2, -1];  $P < 0.001$ ) (Table 3).  
5  
6  
7  
8  
9

### 10 **Adverse Events**

11 No serious adverse events or events that involved hospitalisation occurred during the study.  
12  
13  
14

### 17 **Discussion**

18  
19 The present study demonstrated that consumption of a low-carbohydrate vegan diet resulted in  
20 modestly greater body weight reductions compared to a high-carbohydrate diet (7% versus 6%  
21 reductions, respectively) over a six-month ad libitum period. These reductions were similar to  
22 those reported for low-carbohydrate “Atkins-like” diets [2 3 6 10]. However by comparison with  
23 the high-carbohydrate diet, consumption of the low-carbohydrate diet containing vegetable  
24 proteins and oils was also associated with significantly reduced concentrations of LDL-C. This  
25 LDL-C reduction has not been reported for other low-carbohydrate diet studies in which a large  
26 part of the protein and fat originated from animal sources and where increases in LDL-C were  
27 seen [2-6 8]. The sustained reduction in LDL-C, associated with only a small incremental weight  
28 loss on the 6-month self-selected diet, is a potentially important attribute of the diet in reducing  
29 long-term CHD risk [45 46]. Furthermore, as seen in the present study, a low-carbohydrate diet,  
30 in which vegetable fat and protein options were encouraged, demonstrated a larger reduction in  
31 the TC:HDL-C ratio than that reported at 6 months in weight loss studies employing either a  
32 Mediterranean or a high-carbohydrate diet [10].  
33  
34  
35  
36  
37  
38  
39  
40  
41  
42  
43  
44  
45  
46  
47  
48  
49  
50  
51

52 The majority of studies undertaken to date have been 6 months to one year in duration [2-6 47]  
53 with more recent studies of up to 2 years [2 8] and, as with the present study, a number of these  
54  
55  
56  
57  
58  
59  
60

1  
2  
3 studies had a high dropout rate [2 3 5 47]. However, the high dropout rate in the present study  
4  
5 did not prevent identification of significant LDL-C and body weight differences in the intent-to-  
6  
7 treat analysis (using all available data). The completer data therefore demonstrated an even larger  
8  
9 treatment difference in LDL-C of -0.60mmol/L [-0.84, -0.36] favoring the test treatment  
10  
11 (P<0.001). Those on the low-carbohydrate diet showed overall adherence to the major dietary  
12  
13 components [vegetable proteins (soy and gluten), nuts, and viscous fibers] at 33.6% of that  
14  
15 provided during the metabolic phase [1]. This adherence is similar to the 43.3% seen with the  
16  
17 dietary portfolio in the comparison of the metabolic one month [35] and the ad libitum six  
18  
19 month studies [48]. In this comparison also just under half the LDL-C reduction (13-14%) seen  
20  
21 on the ad libitum compared to the metabolic study [35].  
22  
23  
24  
25  
26

27 The effect of low-carbohydrate diets on CHD events has not been assessed in randomized  
28  
29 controlled trials. Nevertheless, low-carbohydrate diets high in vegetable proteins and oils have  
30  
31 been associated with a 30% reduced CHD risk and an 18% reduced incidence of diabetes in  
32  
33 cohort studies [30 31]. The median interquartile difference in these studies between the first and  
34  
35 10<sup>th</sup> decile for vegetable protein and monounsaturated fat (MUFA) intakes, as a marker of  
36  
37 increased vegetable oil consumption, was 1.4% and 9.3% expressed as a percentage of total  
38  
39 caloric intake [30]. These figures compared to 8.2% and 4.6% in our studies as the relative  
40  
41 increase from baseline on the Eco-Atkins diet compared to the control diet. The increases in  
42  
43 MUFA were therefore seen in both studies. Recently a Spanish Mediterranean diet emphasizing  
44  
45 increased nut or olive oil consumption, increasing monounsaturated fat intake by 2-3%, has been  
46  
47 shown to significantly reduce cardiovascular events also by approximately 30% [33]. These data  
48  
49 provide consistent support for the view that the Eco-Atkins approach would reduce CHD risk in  
50  
51 the long term.  
52  
53  
54  
55  
56  
57  
58  
59  
60



1  
2  
3 The present diet, while lowering LDL-C by 9%, did not result in any significant depression of  
4 HDL-C. Lowering LDL-C while maintaining HDL-C would be expected to reduce CHD risk [45  
5  
6  
7  
8 46]. Similarly, reductions in ApoB and the ApoB:A1 ratio were also observed in the present  
9  
10 study. These findings further support the potential CHD benefit that this weight loss diet may  
11  
12 have [49-51]. It has also been claimed that apolipoproteins may be stronger predictors of CHD  
13  
14 events than conventional lipid variables [52-54].

15  
16  
17 In contrast to the metabolic study, the reductions in systolic and diastolic blood pressure were not  
18  
19 significant between the diets. Similarly, hs-CRP was unchanged between treatments, however,  
20  
21 the level was significantly reduced with the low-carbohydrate diet compared to baseline. Studies  
22  
23 have shown that hs-CRP tended to be lowest on the diets containing the highest proportion of  
24  
25 carbohydrate [5]. Low glycemic index and low glycemic load diets have also been associated  
26  
27 with lower hs-CRP concentrations [55 56]. These advantages of the higher carbohydrate diet  
28  
29 may have reduced any hs-CRP difference between the two diets in the present study.  
30  
31  
32

33  
34 Soy-containing foods as well as nuts have cholesterol lowering effects [15 17 18 57 58] and may  
35  
36 explain the present results on LDL-C. Viscous fiber in low starch vegetables and  $\beta$ -glucan in oats  
37  
38 and barley may also contribute to the overall cholesterol lowering effect of the diet [9 14 45].  
39  
40 Furthermore, nuts and high fiber food consumption have been associated with lower body weight  
41  
42 [59].  
43  
44

45  
46 The study weaknesses include the relatively small sample size and the high dropout rate.

47  
48 Nevertheless, high dropout rates have been reported in similar dietary studies and it is  
49  
50 noteworthy that attrition rates were low in the metabolic study when all food was provided [1].  
51  
52 Food availability and preparation may therefore be important factors. For those who did  
53  
54 complete the study, however, there were benefits in weight loss and LDL-C reduction, an  
55  
56  
57  
58  
59  
60

1  
2  
3 additional 2% advantage in body weight reduction compared to the high-carbohydrate diet and a  
4  
5 13% drop in LDL-C for participants consuming a more plant-based low-carbohydrate diet.  
6  
7

8 The study's strength is that the prescribed hypocaloric diet was self-selected, meaning the results  
9  
10 are more in line with what can be expected under free-living conditions. The breadth of  
11  
12 application of the plant-based low-carbohydrate diet, however, remains to be determined, but it  
13  
14 may provide an option for some individuals for whom LDL-C reduction is an equal concern to  
15  
16 weight loss. If low-carbohydrate dietary options become more generally available the number of  
17  
18 individuals who will benefit is likely to increase.  
19  
20

21  
22 We conclude that a weight-reducing diet which reduced carbohydrate in exchange for increased  
23  
24 intakes of vegetable sources of protein, such as gluten, soy and nuts, together with vegetable oils  
25  
26 offer an opportunity to improve both LDL-C and body weight, both being risk factors for CHD.  
27  
28

29 Further human trials are warranted to evaluate low-carbohydrate diets, including more plant-  
30  
31 based low-carbohydrate diets, on CHD risk factors and ultimately on CHD.  
32  
33  
34  
35  
36  
37  
38  
39  
40  
41  
42  
43  
44  
45  
46  
47  
48  
49  
50  
51  
52  
53  
54  
55  
56  
57  
58  
59  
60

## Acknowledgements

We thank all the study participants for their attention to detail and enthusiasm.

Dr. Jenkins, together with those responsible for analysis and interpretation of data, had full access to all the data in the study and takes responsibility for the integrity of the data and the accuracy of the data analysis.

## Sources of Funding

This study was supported by Solae, LLC; Loblaw Companies Limited, and the Canada Research Chair Program of the Federal Government of Canada. Dr. Wong was a recipient of a Canadian Institutes of Health Research (CIHR) Doctoral Research Award, and is now a holder of a CIHR Randomized Controlled Trials – Mentoring Program Training Grant.

## Role of the Sponsors

None of the funding organizations or sponsors played any significant role in the design and conduct of the study, in the collection, management, analysis, and interpretation of the data, or in the preparation, or approval of the manuscript. However, the named co-authors from Solae LLC reviewed the manuscript.

## Disclosures

Dr. Jenkins has served on the Scientific Advisory Board of Sanitarium Company, Agri-Culture and Agri-Food Canada (AAFC), Canadian Agriculture Policy Institute (CAPI), California Strawberry Commission, Loblaw Supermarket, Herbal Life International, Nutritional Fundamental for Health, Pacific Health Laboratories, Metagenics, Bayer Consumer Care, Orafti,

1  
2  
3 Dean Foods, Kellogg's, Quaker Oats, Procter & Gamble, Coca-Cola, NuVal Griffin Hospital,  
4  
5 Abbott, Pulse Canada, Saskatchewan Pulse Growers, and Canola Council of Canada; received  
6  
7 honoraria for scientific advice from Sanitarium Company, Orafti, the Almond Board of  
8  
9 California, the American Peanut Council, International Tree Nut Council Nutrition Research and  
10  
11 Education Foundation and the Peanut Institute, Herbal Life International, Pacific Health  
12  
13 Laboratories, Nutritional Fundamental for Health, Barilla, Metagenics, Bayer Consumer Care,  
14  
15 Unilever Canada and Netherlands, Solae LLC, Oldways, Kellogg's, Quaker Oats, Procter &  
16  
17 Gamble, Coca-Cola, NuVal Griffin Hospital, Abbott, Canola Council of Canada, Dean Foods,  
18  
19 California Strawberry Commission, Haine Celestial, Pepsi, and Alpro Foundation; has been on  
20  
21 the speakers panel for the Almond Board of California; received research grants from  
22  
23 Saskatchewan Pulse Growers, the Agricultural Bioproducts Innovation Program (ABIP) through  
24  
25 the Pulse Research Network (PURENet), Advanced Food Materials Network (AFMNet),  
26  
27 Loblaw, Unilever, Barilla, Almond Board of California, Coca-Cola, Solae LLC, Haine Celestial,  
28  
29 Sanitarium Company, Orafti, International Tree Nut Council Nutrition Research and Education  
30  
31 Foundation and the Peanut Institute, the Canola and Flax Councils of Canada, Calorie Control  
32  
33 Council, Canadian Institutes of Health Research, Canada Foundation for Innovation, and the  
34  
35 Ontario Research Fund; and received travel support to meetings from the Solae LLC, Sanitarium  
36  
37 Company, Orafti, AFMNet, Coca-Cola, The Canola and Flax Councils of Canada, Oldways  
38  
39 Preservation Trust, Kellogg's, Quaker Oats, Griffin Hospital, Abbott Laboratories, Dean Foods,  
40  
41 the California Strawberry Commission, American Peanut Council, Herbal Life International,  
42  
43 Nutritional Fundamental for Health, Metagenics, Bayer Consumer Care, AAFC, CAPI, Pepsi,  
44  
45 Almond Board of California, Unilever, Alpro Foundation, International Tree Nut Council,  
46  
47 Barilla, Pulse Canada, and the Saskatchewan Pulse Growers. Dr Jenkins' wife is a director of  
48  
49  
50  
51  
52  
53  
54  
55  
56  
57  
58  
59  
60

1  
2  
3 Glycemic Index Laboratories, Toronto, Ontario, Canada. Dr. Kendall reported being on speakers  
4  
5 bureaus for Almond Board of California, Solae LLC, and Unilever; and receiving research grants  
6  
7  
8 from CIHR, Unilever, Solae LLC, Loblaw Brands Ltd, International Tree Nut Council, and  
9  
10 Almond Board of California. Mr. Vidgen has received partial salary funding from research  
11  
12 grants provided by Unilever, Loblaws, and the Almond Board of California. Drs. Paul,  
13  
14 Mukherjea, and Krul are employees of Solae, LLC.  
15  
16  
17  
18  
19  
20  
21  
22  
23  
24  
25  
26  
27  
28  
29  
30  
31  
32  
33  
34  
35  
36  
37  
38  
39  
40  
41  
42  
43  
44  
45  
46  
47  
48  
49  
50  
51  
52  
53  
54  
55  
56  
57  
58  
59  
60

## References

1. Jenkins DJ, Wong JM, Kendall CW, et al. The effect of a plant-based low-carbohydrate ("Eco-Atkins") diet on body weight and blood lipid concentrations in hyperlipidemic subjects. *Arch Intern Med* 2009;**169**(11):1046-54 doi: 10.1001/archinternmed.2009.115[published Online First: Epub Date]].
2. Samaha FF, Iqbal N, Seshadri P, et al. A low-carbohydrate as compared with a low-fat diet in severe obesity. *N Engl J Med* 2003;**348**(21):2074-81
3. Foster GD, Wyatt HR, Hill JO, et al. A randomized trial of a low-carbohydrate diet for obesity. *N Engl J Med* 2003;**348**(21):2082-90
4. Stern L, Iqbal N, Seshadri P, et al. The effects of low-carbohydrate versus conventional weight loss diets in severely obese adults: one-year follow-up of a randomized trial. *Ann Intern Med* 2004;**140**(10):778-85
5. Dansinger ML, Gleason JA, Griffith JL, et al. Comparison of the Atkins, Ornish, Weight Watchers, and Zone diets for weight loss and heart disease risk reduction: a randomized trial. *JAMA* 2005;**293**(1):43-53
6. Gardner CD, Kiazand A, Alhassan S, et al. Comparison of the Atkins, Zone, Ornish, and LEARN diets for change in weight and related risk factors among overweight premenopausal women: the A TO Z Weight Loss Study: a randomized trial. *JAMA* 2007;**297**(9):969-77
7. Sacks FM, Bray GA, Carey VJ, et al. Comparison of weight-loss diets with different compositions of fat, protein, and carbohydrates. *N Engl J Med* 2009;**360**(9):859-73 doi: 10.1056/NEJMoa0804748[published Online First: Epub Date]].

- 1  
2  
3  
4  
5  
6  
7  
8  
9  
10  
11  
12  
13  
14  
15  
16  
17  
18  
19  
20  
21  
22  
23  
24  
25  
26  
27  
28  
29  
30  
31  
32  
33  
34  
35  
36  
37  
38  
39  
40  
41  
42  
43  
44  
45  
46  
47  
48  
49  
50  
51  
52  
53  
54  
55  
56  
57  
58  
59  
60
8. Foster GD, Wyatt HR, Hill JO, et al. Weight and metabolic outcomes after 2 years on a low-carbohydrate versus low-fat diet: a randomized trial. *Ann Intern Med* 2010;**153**(3):147-57  
doi: 10.1059/0003-4819-153-3-201008030-00005[published Online First: Epub Date]].
9. Anderson JW, Randles KM, Kendall CW, et al. Carbohydrate and fiber recommendations for individuals with diabetes: a quantitative assessment and meta-analysis of the evidence. *Journal of the American College of Nutrition* 2004;**23**(1):5-17
10. Shai I, Schwarzfuchs D, Henkin Y, et al. Weight loss with a low-carbohydrate, Mediterranean, or low-fat diet. *N Engl J Med* 2008;**359**(3):229-41
11. Sacks FM, Ornish D, Rosner B, et al. Plasma lipoprotein levels in vegetarians. The effect of ingestion of fats from dairy products. *JAMA* 1985;**254**(10):1337-41
12. Ornish D, Brown SE, Scherwitz LW, et al. Can lifestyle changes reverse coronary heart disease? The Lifestyle Heart Trial. *Lancet* 1990;**336**(8708):129-33
13. Barnard ND, Cohen J, Jenkins DJ, et al. A low-fat vegan diet improves glycemic control and cardiovascular risk factors in a randomized clinical trial in individuals with type 2 diabetes. *Diabetes care* 2006;**29**(8):1777-83
14. Jenkins DJ, Newton C, Leeds AR, et al. Effect of pectin, guar gum, and wheat fibre on serum-cholesterol. *Lancet* 1975;**1**(7916):1116-7
15. Sirtori CR, Agradi E, Conti F, et al. Soybean-protein diet in the treatment of type-II hyperlipoproteinaemia. *Lancet* 1977;**1**(8006):275-7
16. Grundy SM. Comparison of monounsaturated fatty acids and carbohydrates for lowering plasma cholesterol. *N Engl J Med* 1986;**314**(12):745-8
17. Anderson JW, Johnstone BM, Cook-Newell ME. Meta-analysis of the effects of soy protein intake on serum lipids. *N Engl J Med* 1995;**333**(5):276-82

- 1  
2  
3  
4  
5  
6  
7  
8  
9  
10  
11  
12  
13  
14  
15  
16  
17  
18  
19  
20  
21  
22  
23  
24  
25  
26  
27  
28  
29  
30  
31  
32  
33  
34  
35  
36  
37  
38  
39  
40  
41  
42  
43  
44  
45  
46  
47  
48  
49  
50  
51  
52  
53  
54  
55  
56  
57  
58  
59  
60
18. Kris-Etherton PM, Yu-Poth S, Sabate J, et al. Nuts and their bioactive constituents: effects on serum lipids and other factors that affect disease risk. *Am J Clin Nutr* 1999;**70**(3 Suppl):504S-11S
  19. Sabate J, Oda K, Ros E. Nut consumption and blood lipid levels: a pooled analysis of 25 intervention trials. *Arch Intern Med* 2010;**170**(9):821-7 doi: 10.1001/archinternmed.2010.79[published Online First: Epub Date].
  20. Ros E, Nunez I, Perez-Heras A, et al. A walnut diet improves endothelial function in hypercholesterolemic subjects: a randomized crossover trial. *Circulation* 2004;**109**(13):1609-14 doi: 10.1161/01.CIR.0000124477.91474.FF[published Online First: Epub Date]].
  21. Zhao G, Etherton TD, Martin KR, et al. Dietary alpha-linolenic acid reduces inflammatory and lipid cardiovascular risk factors in hypercholesterolemic men and women. *J Nutr* 2004;**134**(11):2991-7
  22. West SG, Krick AL, Klein LC, et al. Effects of diets high in walnuts and flax oil on hemodynamic responses to stress and vascular endothelial function. *Journal of the American College of Nutrition* 2010;**29**(6):595-603
  23. Ma Y, Njike VY, Millet J, et al. Effects of walnut consumption on endothelial function in type 2 diabetic subjects: a randomized controlled crossover trial. *Diabetes care* 2010;**33**(2):227-32 doi: 10.2337/dc09-1156[published Online First: Epub Date]].
  24. Appleby PN, Thorogood M, Mann JI, et al. The Oxford Vegetarian Study: an overview. *Am J Clin Nutr* 1999;**70**(3 Suppl):525S-31S
  25. Fraser GE. *Diet, life expectancy, and chronic disease: studies of Seventh-Day Adventists and other vegetarians*. New York: Oxford University Press, 2003.



- 1  
2  
3  
4  
5  
6  
7  
8  
9  
10  
11  
12  
13  
14  
15  
16  
17  
18  
19  
20  
21  
22  
23  
24  
25  
26  
27  
28  
29  
30  
31  
32  
33  
34  
35  
36  
37  
38  
39  
40  
41  
42  
43  
44  
45  
46  
47  
48  
49  
50  
51  
52  
53  
54  
55  
56  
57  
58  
59  
60
26. Pereira MA, O'Reilly E, Augustsson K, et al. Dietary fiber and risk of coronary heart disease: a pooled analysis of cohort studies. *Arch Intern Med* 2004;**164**(4):370-6
27. Li TY, Brennan AM, Wedick NM, et al. Regular consumption of nuts is associated with a lower risk of cardiovascular disease in women with type 2 diabetes. *J Nutr* 2009;**139**(7):1333-8 doi: 10.3945/jn.108.103622[published Online First: Epub Date]].
28. Kris-Etherton PM, Hu FB, Ros E, et al. The role of tree nuts and peanuts in the prevention of coronary heart disease: multiple potential mechanisms. *J Nutr* 2008;**138**(9):1746S-51S
29. Pan A, Sun Q, Manson JE, et al. Walnut consumption is associated with lower risk of type 2 diabetes in women. *J Nutr* 2013;**143**(4):512-8 doi: 10.3945/jn.112.172171[published Online First: Epub Date]].
30. Halton TL, Willett WC, Liu S, et al. Low-carbohydrate-diet score and the risk of coronary heart disease in women. *N Engl J Med* 2006;**355**(19):1991-2002
31. Halton TL, Liu S, Manson JE, et al. Low-carbohydrate-diet score and risk of type 2 diabetes in women. *Am J Clin Nutr* 2008;**87**(2):339-46 doi: 87/2/339 [pii][published Online First: Epub Date]].
32. Pan A, Sun Q, Bernstein AM, et al. Red meat consumption and mortality: results from 2 prospective cohort studies. *Archives of internal medicine* 2012;**172**(7):555-63 doi: 10.1001/archinternmed.2011.2287[published Online First: Epub Date]].
33. Estruch R, Ros E, Salas-Salvado J, et al. Primary prevention of cardiovascular disease with a Mediterranean diet. *N Engl J Med* 2013;**368**(14):1279-90 doi: 10.1056/NEJMoa1200303[published Online First: Epub Date]].
34. Sacks FM, Kass EH. Low blood pressure in vegetarians: effects of specific foods and nutrients. *Am J Clin Nutr* 1988;**48**(3 Suppl):795-800

- 1  
2  
3 35. Jenkins DJ, Kendall CW, Marchie A, et al. Effects of a dietary portfolio of cholesterol-  
4  
5 lowering foods vs lovastatin on serum lipids and C-reactive protein. JAMA  
6  
7 2003;**290**(4):502-10  
8  
9
- 10 36. Appel LJ, Sacks FM, Carey VJ, et al. Effects of protein, monounsaturated fat, and  
11  
12 carbohydrate intake on blood pressure and serum lipids: results of the OmniHeart  
13  
14 randomized trial. JAMA 2005;**294**(19):2455-64  
15  
16
- 17 37. Gardner CD, Coulston A, Chatterjee L, et al. The effect of a plant-based diet on plasma lipids  
18  
19 in hypercholesterolemic adults: a randomized trial. Ann Intern Med 2005;**142**(9):725-33  
20  
21
- 22 38. Harris JA, Benedict FG. *A biometric study of basal metabolism in man*. Washington, DC:  
23  
24 Carnegie Institute of Washington, 1919 (Publication no. 279.).  
25  
26
- 27 39. Shetty PS, Henry CJ, Black AE, et al. Energy requirements of adults: an update on basal  
28  
29 metabolic rates (BMRs) and physical activity levels (PALs). Eur J Clin Nutr 1996;**50**  
30  
31 **Suppl 1**:S11-23  
32  
33
- 34 40. Pereira MA, Swain J, Goldfine AB, et al. Effects of a low-glycemic load diet on resting  
35  
36 energy expenditure and heart disease risk factors during weight loss. JAMA  
37  
38 2004;**292**(20):2482-90  
39  
40
- 41 41. Ainsworth BE, Haskell WL, Leon AS, et al. Compendium of physical activities:  
42  
43 classification of energy costs of human physical activities. Med Sci Sports Exerc  
44  
45 1993;**25**(1):71-80  
46  
47
- 48 42. Anderson KM, Wilson PW, Odell PM, et al. An updated coronary risk profile. A statement  
49  
50 for health professionals. Circulation 1991;**83**(1):356-62  
51  
52
- 53 43. USDA Nutrient Database for Standard Reference, Release 19. Nutrient Data Laboratory  
54  
55 Home Page: U.S. Department of Agriculture, Agricultural Research Service, 2006.  
56  
57  
58  
59  
60

- 1  
2  
3  
4 44. SAS Institute. SAS/STAT User's Guide (ed 9.2) [program]. Cary, NC: SAS Institute, 2008.  
5  
6 45. Executive Summary of The Third Report of The National Cholesterol Education Program  
7  
8 (NCEP) Expert Panel on Detection, Evaluation, And Treatment of High Blood  
9  
10 Cholesterol In Adults (Adult Treatment Panel III). JAMA 2001;**285**(19):2486-97  
11  
12 46. Grundy SM, Cleeman JI, Merz CN, et al. Implications of recent clinical trials for the  
13  
14 National Cholesterol Education Program Adult Treatment Panel III guidelines.  
15  
16 Circulation 2004;**110**(2):227-39  
17  
18 47. Westman EC, Yancy WS, Edman JS, et al. Effect of 6-month adherence to a very low  
19  
20 carbohydrate diet program. Am J Med 2002;**113**(1):30-6  
21  
22 48. Jenkins DJ, Jones PJ, Lamarche B, et al. Effect of a dietary portfolio of cholesterol-lowering  
23  
24 foods given at 2 levels of intensity of dietary advice on serum lipids in hyperlipidemia: a  
25  
26 randomized controlled trial. JAMA 2011;**306**(8):831-9 doi:  
27  
28 10.1001/jama.2011.1202[published Online First: Epub Date].  
29  
30 49. Gotto AM, Jr., Whitney E, Stein EA, et al. Relation between baseline and on-treatment lipid  
31  
32 parameters and first acute major coronary events in the Air Force/Texas Coronary  
33  
34 Atherosclerosis Prevention Study (AFCAPS/TexCAPS). Circulation 2000;**101**(5):477-84  
35  
36 50. Sniderman AD, Furberg CD, Keech A, et al. Apolipoproteins versus lipids as indices of  
37  
38 coronary risk and as targets for statin treatment. Lancet 2003;**361**(9359):777-80  
39  
40 51. Yusuf S, Hawken S, Ounpuu S, et al. Effect of potentially modifiable risk factors associated  
41  
42 with myocardial infarction in 52 countries (the INTERHEART study): case-control  
43  
44 study. Lancet 2004;**364**(9438):937-52  
45  
46  
47  
48  
49  
50  
51  
52  
53  
54  
55  
56  
57  
58  
59  
60

- 1  
2  
3  
4  
5  
6  
7  
8  
9  
10  
11  
12  
13  
14  
15  
16  
17  
18  
19  
20  
21  
22  
23  
24  
25  
26  
27  
28  
29  
30  
31  
32  
33  
34  
35  
36  
37  
38  
39  
40  
41  
42  
43  
44  
45  
46  
47  
48  
49  
50  
51  
52  
53  
54  
55  
56  
57  
58  
59  
60
52. McQueen MJ, Hawken S, Wang X, et al. Lipids, lipoproteins, and apolipoproteins as risk factors of myocardial infarction in 52 countries (the INTERHEART study): a case-control study. *Lancet* 2008;**372**:224-33
53. Contois JH, McConnell JP, Sethi AA, et al. Apolipoprotein B and cardiovascular disease risk: position statement from the AACC Lipoproteins and Vascular Diseases Division Working Group on Best Practices. *Clin Chem* 2009;**55**(3):407-19 doi: 10.1373/clinchem.2008.118356[published Online First: Epub Date]].
54. Sniderman AD, Williams K, Contois JH, et al. A meta-analysis of low-density lipoprotein cholesterol, non-high-density lipoprotein cholesterol, and apolipoprotein B as markers of cardiovascular risk. *Circ Cardiovasc Qual Outcomes* 2011;**4**(3):337-45 doi: 10.1161/CIRCOUTCOMES.110.959247[published Online First: Epub Date]].
55. Liu S, Manson JE, Buring JE, et al. Relation between a diet with a high glycemic load and plasma concentrations of high-sensitivity C-reactive protein in middle-aged women. *Am J Clin Nutr* 2002;**75**(3):492-8
56. Wolever TM, Gibbs AL, Mehling C, et al. The Canadian Trial of Carbohydrates in Diabetes (CCD), a 1-y controlled trial of low-glycemic-index dietary carbohydrate in type 2 diabetes: no effect on glycated hemoglobin but reduction in C-reactive protein. *Am J Clin Nutr* 2008;**87**(1):114-25
57. Sabate J, Fraser GE, Burke K, et al. Effects of walnuts on serum lipid levels and blood pressure in normal men. *N Engl J Med* 1993;**328**(9):603-7
58. Jenkins DJ, Kendall CW, Marchie A, et al. Dose response of almonds on coronary heart disease risk factors: blood lipids, oxidized low-density lipoproteins, lipoprotein(a),

1  
2  
3 homocysteine, and pulmonary nitric oxide: a randomized, controlled, crossover trial.

4  
5  
6 Circulation 2002;**106**(11):1327-32

- 7  
8 59. Mozaffarian D, Hao T, Rimm EB, et al. Changes in diet and lifestyle and long-term weight  
9 gain in women and men. The New England journal of medicine 2011;**364**(25):2392-404  
10  
11 doi: 10.1056/NEJMoa1014296[published Online First: Epub Date]].  
12  
13  
14  
15  
16  
17  
18  
19  
20  
21  
22  
23  
24  
25  
26  
27  
28  
29  
30  
31  
32  
33  
34  
35  
36  
37  
38  
39  
40  
41  
42  
43  
44  
45  
46  
47  
48  
49  
50  
51  
52  
53  
54  
55  
56  
57  
58  
59  
60

For peer review only

1  
2  
3 **Figure Legends**  
4  
5  
6  
7

8 Figure 1: Patient Flow Diagram.  
9

10  
11  
12 Figure 2: Weight loss during the study on both diets.  
13  
14

15  
16  
17 Figure 3: Mean (A) LDL-C, (B) HDL-C, (C) TC:HDL-C, (D) apolipoprotein B (apoB) and (E)  
18 apolipoprotein A1 (apoA1), (F) ApoB:ApoA1 ratio between the two treatments.  
19  
20  
21  
22  
23  
24  
25  
26  
27  
28  
29  
30  
31  
32  
33  
34  
35  
36  
37  
38  
39  
40  
41  
42  
43  
44  
45  
46  
47  
48  
49  
50  
51  
52  
53  
54  
55  
56  
57  
58  
59  
60

**Table 1: Baseline Characteristics for Those Who Started the 6-Month Self-Selected Diets (n=39)**

|                                          | High-carbohydrate (n=19) | Low-Carbohydrate (n=20) |
|------------------------------------------|--------------------------|-------------------------|
| Age (y)                                  | 55.3 ± 1.8               | 57.6 ± 1.4              |
| Males/Females                            | 6/13                     | 9/11                    |
| Body Weight, kg                          | 85.4 [79.3, 91.6]        | 83.7 [78.5, 89.0]       |
| Body Mass Index, kg/m <sup>2</sup>       | 31.1 [29.9, 32.4]        | 31.1 [29.8, 32.4]       |
| Blood Pressure, mm Hg                    |                          |                         |
| Systolic                                 | 122 [116, 128]           | 128 [123, 132]          |
| Diastolic                                | 75 [72, 79]              | 77 [74, 80]             |
| Cholesterol, mmol/L                      |                          |                         |
| Total                                    | 6.75 [6.28, 7.21]        | 6.76 [6.21, 7.31]       |
| LDL-C                                    | 4.40 [3.99, 4.82]        | 4.53 [4.14, 4.93]       |
| HDL-C                                    | 1.36 [1.22, 1.50]        | 1.21 [1.06, 1.36]       |
| Triglycerides, mmol/L                    | 2.16 [1.62, 2.70]        | 2.23 [1.65, 2.80]       |
| Ratios                                   |                          |                         |
| TC:HDL-C                                 | 5.17 [4.54, 5.80]        | 5.81 [5.20, 6.41]       |
| LDL-C: HDL-C                             | 3.35 [2.95, 3.75]        | 3.89 [3.49, 4.29]       |
| Medications                              |                          |                         |
| Lipid lowering (prior to start of study) | 4                        | 7                       |
| Blood pressure                           | 3                        | 6                       |
| Diabetes                                 | 0                        | 0                       |
| Thyroid                                  | 2                        | 1                       |

Values represent mean ± SEM or 95% confidence intervals (CIs).

No significant differences between treatments at baseline assessed by two sample t-test (two-tailed).

**Table 2: Nutritional Profiles on the High and Low Carbohydrate Diets (n=39)**

|                                                                                                                                                                                                                                                                                                                                           | High Carbohydrate   |                         | Low Carbohydrate    |                         | Between-Treatment Difference <sup>c</sup> | P-value <sup>d</sup> |
|-------------------------------------------------------------------------------------------------------------------------------------------------------------------------------------------------------------------------------------------------------------------------------------------------------------------------------------------|---------------------|-------------------------|---------------------|-------------------------|-------------------------------------------|----------------------|
|                                                                                                                                                                                                                                                                                                                                           | Week 0 <sup>b</sup> | Ad Libitum <sup>b</sup> | Week 0 <sup>b</sup> | Ad Libitum <sup>b</sup> |                                           |                      |
| Calories (kcal)                                                                                                                                                                                                                                                                                                                           | 1598 [1421, 1775]   | 1347 [1140, 1553]       | 1840 [1550, 2130]   | 1388 [1234, 1541]       | -248 [-391, -106]                         | 0.001                |
| % of Total Calories                                                                                                                                                                                                                                                                                                                       |                     |                         |                     |                         |                                           |                      |
| Available Carbohydrate                                                                                                                                                                                                                                                                                                                    | 46.3 [42.2, 50.4]   | 53.9 [50.2, 57.5]       | 43.8 [40.2, 47.4]   | 39.6 [35.7, 43.6]       | -10.5 [-13.6, -7.5]                       | < 0.001              |
| Protein                                                                                                                                                                                                                                                                                                                                   | 20.6 [18.7, 22.5]   | 18.4 [17.4, 19.5]       | 20.1 [18.0, 22.2]   | 22.7 [20.1, 25.4]       | 5.9 [4.3, 7.5]                            | < 0.001              |
| Vegetable Protein                                                                                                                                                                                                                                                                                                                         | 5.6 [5.0, 6.1]      | 6.7 [6.1, 7.3]          | 5.7 [5.3, 6.1]      | 15.0 [11.7, 18.2]       | 8.2 [6.5, 9.9]                            | < 0.001              |
| Soy Protein                                                                                                                                                                                                                                                                                                                               | 0 [0, 0]            | 0.2 [0.1, 0.2]          | 0 [0, 0]            | 4.7 [2.7, 6.8]          | 3.6 [2.9, 4.4]                            | < 0.001              |
| Fat                                                                                                                                                                                                                                                                                                                                       | 30.8 [27.3, 34.4]   | 27.5 [24.6, 30.4]       | 34.4 [31.4, 37.5]   | 36.0 [31.5, 40.5]       | 5.2 [2.6, 7.7]                            | < 0.001              |
| Saturated                                                                                                                                                                                                                                                                                                                                 | 10.8 [9.1, 12.6]    | 7.6 [6.2, 8.9]          | 11.8 [10.3, 13.3]   | 7.5 [6.6, 8.4]          | -0.4 [-1.4, 0.6]                          | 0.401                |
| Monounsaturated                                                                                                                                                                                                                                                                                                                           | 12.3 [10.7, 13.8]   | 10.4 [9.3, 11.6]        | 13.0 [11.9, 14.2]   | 14.8 [13.1, 16.6]       | 4.6 [3.1, 6.1]                            | < 0.001              |
| Polyunsaturated*                                                                                                                                                                                                                                                                                                                          | 5.2 [4.6, 5.8]      | 6.3 [5.4, 7.2]          | 6.6 [5.5, 7.8]      | 8.4 [7.5, 9.4]          | 0.4 [-0.5, 1.4]                           | 0.4                  |
| Alcohol                                                                                                                                                                                                                                                                                                                                   | 2.2 [0.3, 4.2]      | 1.9 [0.7, 3.2]          | 1.6 [0.0, 3.3]      | 1.1 [0.1, 2.1]          | -0.5 [-1.3, 0.2]                          | 0.160                |
| Dietary Fibre (g/1000 kcal)                                                                                                                                                                                                                                                                                                               | 10.9 [9.2, 12.5]    | 18.2 [15.2, 21.1]       | 12.1 [9.9, 14.4]    | 21.3 [18.8, 23.8]       | 1.5 [-0.5, 3.5]                           | 0.127                |
| Dietary Cholesterol (mg/1000 kcal)                                                                                                                                                                                                                                                                                                        | 149 [129, 169]      | 87 [61, 113]            | 157 [136, 177]      | 117 [44, 189]           | 11 [-22, 23]                              | 0.954                |
| Adherence with "Eco-Atkins" Components <sup>a</sup>                                                                                                                                                                                                                                                                                       |                     |                         |                     |                         |                                           |                      |
| Viscous Fiber (out of 33.3%)                                                                                                                                                                                                                                                                                                              | ---                 | ---                     | ---                 | 14.0 [9.4, 18.6]        | ---                                       | ---                  |
| Vegetable Protein (soy and gluten) (out of 33.3%)                                                                                                                                                                                                                                                                                         | ---                 | ---                     | ---                 | 14.7 [10.3, 19.1]       | ---                                       | ---                  |
| Nuts (out of 33.3%)                                                                                                                                                                                                                                                                                                                       | ---                 | ---                     | ---                 | 6.3 [3.3, 9.3]          | ---                                       | ---                  |
| Total Adherence (out of 100%)                                                                                                                                                                                                                                                                                                             | ---                 | ---                     | ---                 | 33.6 [22.1, 45.2]       | ---                                       | ---                  |
| Values represent mean ± 95% confidence intervals (CIs).                                                                                                                                                                                                                                                                                   |                     |                         |                     |                         |                                           |                      |
| <sup>a</sup> Adherence represents the mean percentage intake of the prescribed intake of the 3 cholesterol-lowering components [viscous fiber, vegetable protein (soy and gluten), nuts] by expressing the recorded intake for each component as 33.3%. The sum of the 3 components if consumed as prescribed would equal 100% adherence. |                     |                         |                     |                         |                                           |                      |
| <sup>b</sup> Values represent multiple imputation (taking the mean of 5 sets of randomly imputed values) to generate data for those who dropped out or had missing values.                                                                                                                                                                |                     |                         |                     |                         |                                           |                      |
| <sup>c</sup> Between Treatment Difference = Change from baseline between the two diets using all available data.                                                                                                                                                                                                                          |                     |                         |                     |                         |                                           |                      |
| <sup>d</sup> P-values assessed using all available data and a repeated measures mixed model accounting for time of assessment. The response variable was change from baseline, with diet and week as fixed effects and subject ID nested in diet. There was no adjustment for baseline.                                                   |                     |                         |                     |                         |                                           |                      |
| *Significantly different between treatments at baseline assessed by two sample t-test (two tailed), P=0.025.                                                                                                                                                                                                                              |                     |                         |                     |                         |                                           |                      |



**Table 3: Effect of high and low carbohydrate diets on body weight, blood lipids, apolipoproteins and 10-yr CHD risk (n=39)**

|                                   | High Carbohydrate   |                         | Low Carbohydrate    |                         | Between Treatment Difference <sup>b</sup> | P-value <sup>c</sup> |
|-----------------------------------|---------------------|-------------------------|---------------------|-------------------------|-------------------------------------------|----------------------|
|                                   | Week 0 <sup>a</sup> | Ad Libitum <sup>a</sup> | Week 0 <sup>a</sup> | Ad Libitum <sup>a</sup> |                                           |                      |
| Body Weight, kg                   | 85.4 [79.3, 91.6]   | 80.4 [74.2, 86.6]       | 83.7 [78.5, 89.0]   | 76.9 [71.9, 81.9]       | -1.1 [-2.1, 0.0]                          | 0.047                |
| BMI                               | 31.1 [29.9, 32.4]   | 29.2 [27.9, 30.5]       | 31.1 [29.8, 32.4]   | 28.7 [27.3, 30.1]       | -0.4 [-0.8, 0.0]                          | 0.039                |
| Body Fat, %                       | 38.9 [34.0, 43.8]   | 35.0 [30.7, 39.2]       | 35.6 [30.1, 41.1]   | 31.4 [26.1, 36.6]       | -1.7 [-4.0, 0.7]                          | 0.161                |
| Waist Circumference (cm)          | 102.8 [99.4, 106.2] | 97.4 [93.1, 101.6]      | 99.8 [96.1, 103.5]  | 93.7 [89.8, 97.7]       | 0.1 [-1.1, 1.3]                           | 0.861                |
| Fasting Glucose (mmol/L)          | 5.2 [4.9, 5.4]      | 4.6 [4.5, 4.7]          | 5.2 [5.0, 5.4]      | 4.6 [4.4, 4.9]          | 0.1 [-0.1, 0.2]                           | 0.447                |
| Fasting Insulin (pmol/L)          | 50.0 [38.3, 61.7]   | 36.4 [27.5, 45.4]       | 47.3 [36.9, 57.6]   | 33.3 [22.8, 43.9]       | -0.6 [-9.1, 8.0]                          | 0.898                |
| HOMA-IR                           | 1.65 [1.17, 2.13]   | 1.11 [0.81, 1.41]       | 1.53 [1.19, 1.88]   | 0.99 [0.68, 1.30]       | 0.01 [-0.30, 0.33]                        | 0.937                |
| Satiety (-4 to 4)                 | 1.0 [0.7, 1.4]      | 0.9 [0.7, 1.2]          | 1.2 [0.8, 1.7]      | 1.1 [0.8, 1.4]          | -0.1 [-0.4, 0.2]                          | 0.440                |
| Exercise, METs                    | 17.4 [12.4, 22.4]   | 25.8 [21.1, 30.6]       | 24.0 [12.9, 35.0]   | 23.9 [15.3, 32.6]       | -9.3 [-16.4, -2.2]                        | 0.012                |
| Cholesterol, mmol/L <sup>†</sup>  |                     |                         |                     |                         |                                           |                      |
| Total                             | 6.75 [6.28, 7.21]   | 6.49 [5.97, 7.02]       | 6.76 [6.21, 7.31]   | 6.10 [5.67, 6.53]       | -0.62 [-0.86, -0.37]                      | <0.001               |
| LDL-C                             | 4.40 [3.99, 4.82]   | 4.40 [3.91, 4.90]       | 4.53 [4.14, 4.93]   | 4.06 [3.71, 4.42]       | -0.49 [-0.70, -0.28]                      | <0.001               |
| HDL-C                             | 1.36 [1.22, 1.50]   | 1.35 [1.22, 1.48]       | 1.21 [1.06, 1.36]   | 1.25 [1.10, 1.39]       | 0.03 [-0.02, 0.07]                        | 0.245                |
| Triglycerides                     | 2.16 [1.62, 2.70]   | 1.71 [1.35, 2.07]       | 2.23 [1.65, 2.80]   | 1.50 [1.22, 1.77]       | -0.34 [-0.57, -0.11]                      | 0.005                |
| Ratios                            |                     |                         |                     |                         |                                           |                      |
| Tchol:HDL-C                       | 5.17 [4.54, 5.80]   | 4.92 [4.49, 5.34]       | 5.81 [5.20, 6.41]   | 5.13 [4.65, 5.62]       | -0.57 [-0.83, -0.32]                      | <0.001               |
| LDL-C:HDL-C                       | 3.35 [2.95, 3.75]   | 3.34 [3.00, 3.68]       | 3.89 [3.49, 4.29]   | 3.48 [3.06, 3.90]       | -0.42 [-0.60, -0.24]                      | <0.002               |
| Apolipoproteins, g/L <sup>‡</sup> |                     |                         |                     |                         |                                           |                      |
| Apo A1                            | 1.69 [1.60, 1.78]   | 1.69 [1.60, 1.77]       | 1.57 [1.45, 1.69]   | 1.57 [1.46, 1.67]       | -0.02 [-0.06, 0.02]                       | 0.316                |
| Apo B                             | 1.38 [1.26, 1.50]   | 1.23 [1.13, 1.33]       | 1.42 [1.30, 1.54]   | 1.20 [1.10, 1.31]       | -0.11 [-0.16, -0.06]                      | <0.001               |
| Apo B: Apo A1                     | 0.83 [0.74, 0.91]   | 0.74 [0.68, 0.80]       | 0.92 [0.84, 0.99]   | 0.78 [0.70, 0.86]       | -0.05 [-0.09, -0.02]                      | 0.003                |
| hs-CRP, mg/dL                     | 2.1 [1.0, 3.3]      | 1.9 [1.3, 2.4]          | 3.0 [1.5, 4.5]      | 2.6 [1.0, 4.1]          | -0.4 [-0.9, 0.1]                          | 0.082                |
| Blood Pressure, mmHg              |                     |                         |                     |                         |                                           |                      |
| Systolic                          | 122 [116, 128]      | 118 [114, 122]          | 128 [123, 132]      | 123 [119, 128]          | -2 [-5, 2]                                | 0.356                |
| Diastolic                         | 75 [72, 79]         | 74 [71, 77]             | 77 [74, 80]         | 76 [71, 80]             | -1 [-3, 1]                                | 0.288                |
| 10-yr CHD risk (%)*               | 8 [6, 9]            | 7 [6, 9]                | 12 [9, 14]          | 9 [7, 11]               | -2 [-2, -1]                               | <0.001               |

1  
2  
3  
4  
5  
6  
7  
8  
9  
10  
11  
12  
13  
14  
15  
16  
17  
18  
19  
20  
21  
22  
23  
24  
25  
26  
27  
28  
29  
30  
31  
32  
33  
34  
35  
36  
37  
38  
39  
40  
41  
42  
43  
44  
45  
46  
47  
48  
49

|                                                                                                                                                                                                                                                                                         |  |  |  |  |  |
|-----------------------------------------------------------------------------------------------------------------------------------------------------------------------------------------------------------------------------------------------------------------------------------------|--|--|--|--|--|
| Values represent mean ± 95% confidence intervals (CIs).                                                                                                                                                                                                                                 |  |  |  |  |  |
| <sup>†</sup> To convert total cholesterol, LDL-C, and HDL-C to mg/dL, divide by 0.0259; to convert triglycerides to mg/dL, divide by 0.0113.                                                                                                                                            |  |  |  |  |  |
| <sup>‡</sup> To convert apolipoprotein A1 and B to mg/dL, multiply by 100.                                                                                                                                                                                                              |  |  |  |  |  |
|                                                                                                                                                                                                                                                                                         |  |  |  |  |  |
| <sup>a</sup> Values represent multiple imputation (taking the mean of 5 sets of randomly imputed values) to generate data for those who dropped out or had missing values.                                                                                                              |  |  |  |  |  |
| <sup>b</sup> Between Treatment Difference = Change from baseline between the two diets using all available data.                                                                                                                                                                        |  |  |  |  |  |
| <sup>c</sup> P-values assessed using all available data and a repeated measures mixed model accounting for time of assessment. The response variable was change from baseline, with diet and week as fixed effects and subject ID nested in diet. There was no adjustment for baseline. |  |  |  |  |  |
| <sup>*</sup> Significantly different between treatments at baseline assessed by two sample t-test (two tailed), P=0.007.                                                                                                                                                                |  |  |  |  |  |

peer review only

Figure 1

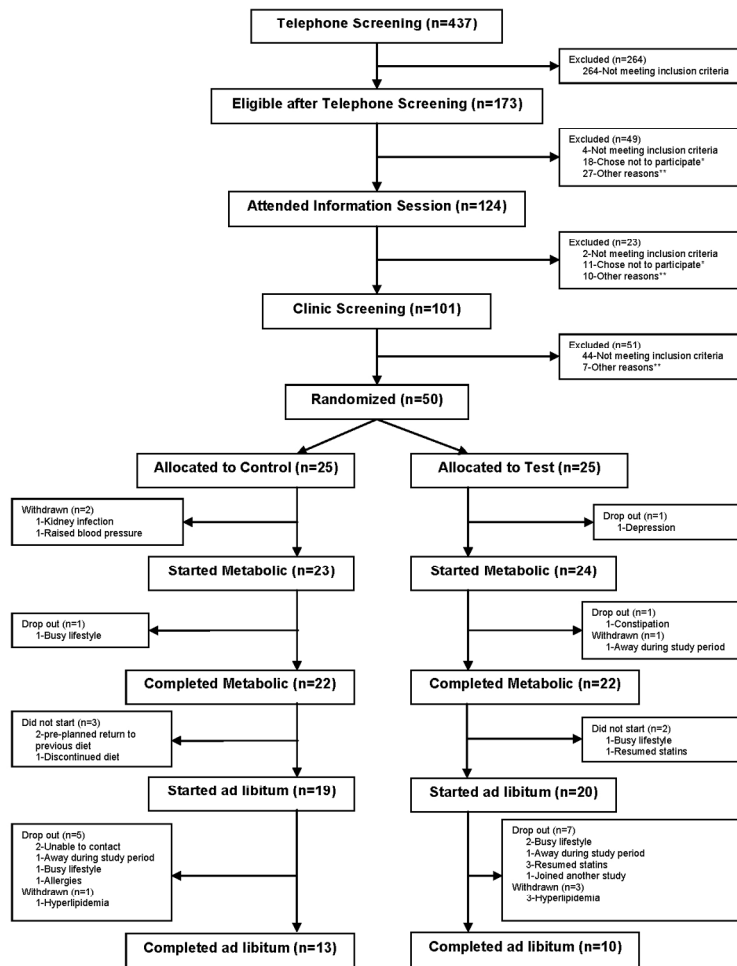

\*Chose not to participate (29): busy lifestyle (13), not interested (6), study too demanding (3), currently on another diet (2), no compensation (2), work-related (2), dislike prepackaged foods (1)

\*\*Other reasons (44): unable to contact (19), unable to come to clinic (13), away (5), throat surgery (1), bowel resection (1), high potassium and BP (1), high potassium (1), raised liver function tests (1), not interested (1), medical insurance issue (1)

215x279mm (200 x 200 DPI)

1  
2  
3  
4  
5  
6  
7  
8  
9  
10  
11  
12  
13  
14  
15  
16  
17  
18  
19  
20  
21  
22  
23  
24  
25  
26  
27  
28  
29  
30  
31  
32  
33  
34  
35  
36  
37  
38  
39  
40  
41  
42  
43  
44  
45  
46  
47  
48  
49  
50  
51  
52  
53  
54  
55  
56  
57  
58  
59  
60

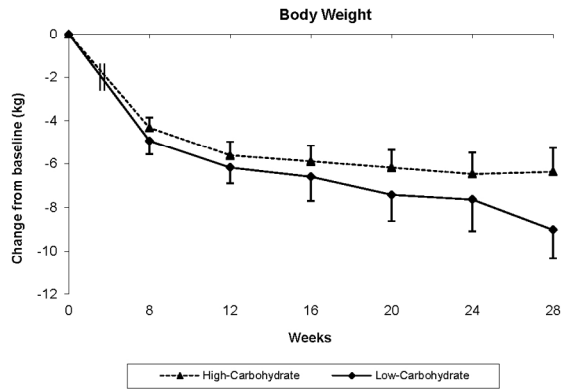

Figure 2: Weight loss during the study on both diets. Values represent mean  $\pm$  SEM of the change from baseline using multiple imputation (taking the mean of 5 sets of randomly imputed values) to generate data for those who dropped out or had missing values.

The change in weight was significantly reduced ( $P=0.047$ ) on the low versus the high carbohydrate diet using all available data in the repeated measures mixed model analysis.

.....  
.....  
.....  
.....  
.....

215x279mm (200 x 200 DPI)

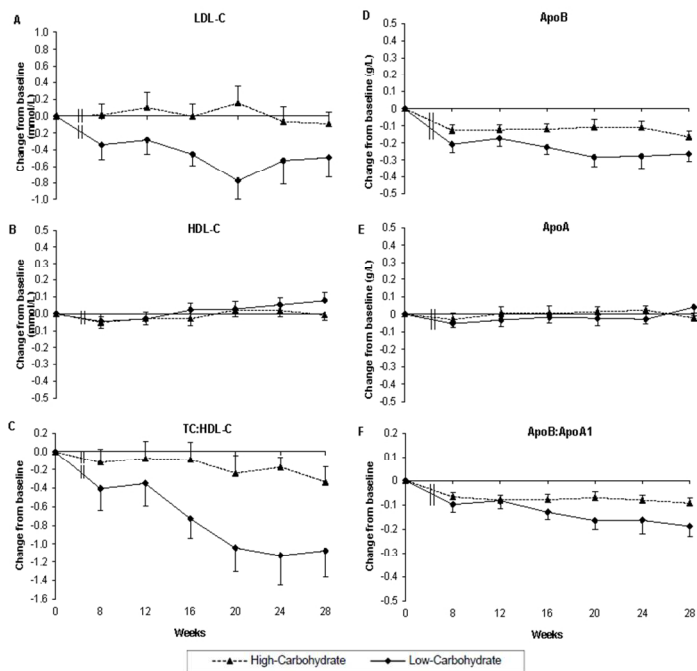

Figure 3. Change in (A) LDL-C, (B) HDL-C, (C) TC:HDL-C, (D) Apolipoprotein B (apoB), (E) Apolipoprotein A1 (apoA1), (F) ApoB:ApoA1 ratio between the two treatments. Values represent mean  $\pm$  SEM of the change from baseline using multiple imputation (taking the mean of 5 sets of randomly imputed values) to generate data for those who dropped out or had missing values. Significant treatment differences were seen for LDL-C ( $P < 0.001$ ), apo B ( $P < 0.001$ ) and the ratios TC:HDL-C ( $P < 0.001$ ) and apoB:apoA1 ( $P = 0.003$ ) using all available data in the repeated measures mixed model analysis.

279x215mm (102 x 114 DPI)

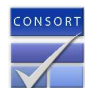

## CONSORT 2010 checklist of information to include when reporting a randomised trial\*

| Section/Topic             | Item No | Checklist item                                                                                                                        | Reported on page No                                           |
|---------------------------|---------|---------------------------------------------------------------------------------------------------------------------------------------|---------------------------------------------------------------|
| <b>Title and abstract</b> |         |                                                                                                                                       |                                                               |
|                           | 1a      | Identification as a randomised trial in the title                                                                                     | 1                                                             |
|                           | 1b      | Structured summary of trial design, methods, results, and conclusions (for specific guidance see CONSORT for abstracts)               | 5-6                                                           |
| <b>Introduction</b>       |         |                                                                                                                                       |                                                               |
| Background and objectives | 2a      | Scientific background and explanation of rationale                                                                                    | 7-8                                                           |
|                           | 2b      | Specific objectives or hypotheses                                                                                                     | 8                                                             |
| <b>Methods</b>            |         |                                                                                                                                       |                                                               |
| Trial design              | 3a      | Description of trial design (such as parallel, factorial) including allocation ratio                                                  | 9                                                             |
|                           | 3b      | Important changes to methods after trial commencement (such as eligibility criteria), with reasons                                    | NA                                                            |
| Participants              | 4a      | Eligibility criteria for participants                                                                                                 | 8, also previously published from results of metabolic phase  |
|                           | 4b      | Settings and locations where the data were collected                                                                                  | 8                                                             |
| Interventions             | 5       | The interventions for each group with sufficient details to allow replication, including how and when they were actually administered | 9-10                                                          |
| Outcomes                  | 6a      | Completely defined pre-specified primary and secondary outcome measures, including how and when they were assessed                    | 10-11                                                         |
|                           | 6b      | Any changes to trial outcomes after the trial commenced, with reasons                                                                 | NA                                                            |
| Sample size               | 7a      | How sample size was determined                                                                                                        | Continuation with ad libitum phase, metabolic phase published |

|    |                |     |                                                                                                                                          |
|----|----------------|-----|------------------------------------------------------------------------------------------------------------------------------------------|
| 1  |                |     |                                                                                                                                          |
| 2  |                |     |                                                                                                                                          |
| 3  |                |     |                                                                                                                                          |
| 4  | Randomisation: | 7b  | When applicable, explanation of any interim analyses and stopping guidelines                                                             |
| 5  | Sequence       |     |                                                                                                                                          |
| 6  | generation     | 8a  | Method used to generate the random allocation sequence                                                                                   |
| 7  |                |     |                                                                                                                                          |
| 8  |                |     |                                                                                                                                          |
| 9  |                |     |                                                                                                                                          |
| 10 |                |     |                                                                                                                                          |
| 11 |                |     |                                                                                                                                          |
| 12 |                |     |                                                                                                                                          |
| 13 |                | 8b  | Type of randomisation; details of any restriction (such as blocking and block size)                                                      |
| 14 |                |     |                                                                                                                                          |
| 15 |                |     |                                                                                                                                          |
| 16 |                |     |                                                                                                                                          |
| 17 |                |     |                                                                                                                                          |
| 18 |                |     |                                                                                                                                          |
| 19 |                |     |                                                                                                                                          |
| 20 |                |     |                                                                                                                                          |
| 21 |                |     |                                                                                                                                          |
| 22 | Allocation     | 9   | Mechanism used to implement the random allocation sequence (such as sequentially numbered containers),                                   |
| 23 | concealment    |     | describing any steps taken to conceal the sequence until interventions were assigned                                                     |
| 24 | mechanism      |     |                                                                                                                                          |
| 25 |                |     |                                                                                                                                          |
| 26 |                |     |                                                                                                                                          |
| 27 |                |     |                                                                                                                                          |
| 28 |                |     |                                                                                                                                          |
| 29 |                |     |                                                                                                                                          |
| 30 | Implementation | 10  | Who generated the random allocation sequence, who enrolled participants, and who assigned participants to interventions                  |
| 31 |                |     |                                                                                                                                          |
| 32 |                |     |                                                                                                                                          |
| 33 |                |     |                                                                                                                                          |
| 34 |                |     |                                                                                                                                          |
| 35 |                |     |                                                                                                                                          |
| 36 |                |     |                                                                                                                                          |
| 37 |                |     |                                                                                                                                          |
| 38 |                |     |                                                                                                                                          |
| 39 | Blinding       | 11a | If done, who was blinded after assignment to interventions (for example, participants, care providers, those assessing outcomes) and how |
| 40 |                |     |                                                                                                                                          |
| 41 |                | 11b | If relevant, description of the similarity of interventions                                                                              |
| 42 |                |     |                                                                                                                                          |
| 43 |                |     |                                                                                                                                          |

|    |                     |     |                                                                                                             |
|----|---------------------|-----|-------------------------------------------------------------------------------------------------------------|
| 1  |                     |     |                                                                                                             |
| 2  | Statistical methods | 12a | Statistical methods used to compare groups for primary and secondary outcomes                               |
| 3  |                     | 12b | Methods for additional analyses, such as subgroup analyses and adjusted analyses                            |
| 4  |                     |     |                                                                                                             |
| 5  | <b>Results</b>      |     |                                                                                                             |
| 6  | Participant flow (a | 13a | For each group, the numbers of participants who were randomly assigned, received intended treatment, and    |
| 7  | diagram is strongly |     | were analysed for the primary outcome                                                                       |
| 8  | recommended)        |     |                                                                                                             |
| 9  |                     | 13b | For each group, losses and exclusions after randomisation, together with reasons                            |
| 10 |                     |     |                                                                                                             |
| 11 |                     |     |                                                                                                             |
| 12 |                     |     |                                                                                                             |
| 13 |                     |     |                                                                                                             |
| 14 | Recruitment         | 14a | Dates defining the periods of recruitment and follow-up                                                     |
| 15 |                     | 14b | Why the trial ended or was stopped                                                                          |
| 16 | Baseline data       | 15  | A table showing baseline demographic and clinical characteristics for each group                            |
| 17 | Numbers analysed    | 16  | For each group, number of participants (denominator) included in each analysis and whether the analysis was |
| 18 |                     |     | by original assigned groups                                                                                 |
| 19 |                     |     |                                                                                                             |
| 20 | Outcomes and        | 17a | For each primary and secondary outcome, results for each group, and the estimated effect size and its       |
| 21 | estimation          |     | precision (such as 95% confidence interval)                                                                 |
| 22 |                     |     |                                                                                                             |
| 23 |                     | 17b | For binary outcomes, presentation of both absolute and relative effect sizes is recommended                 |
| 24 |                     |     |                                                                                                             |
| 25 |                     |     |                                                                                                             |
| 26 |                     |     |                                                                                                             |
| 27 |                     |     |                                                                                                             |
| 28 |                     |     |                                                                                                             |
| 29 |                     |     |                                                                                                             |
| 30 |                     |     |                                                                                                             |
| 31 |                     |     |                                                                                                             |
| 32 |                     |     |                                                                                                             |
| 33 |                     |     |                                                                                                             |
| 34 |                     |     |                                                                                                             |
| 35 |                     |     |                                                                                                             |
| 36 |                     |     |                                                                                                             |
| 37 |                     |     |                                                                                                             |
| 38 |                     |     |                                                                                                             |
| 39 |                     |     |                                                                                                             |
| 40 | Ancillary analyses  | 18  | Results of any other analyses performed, including subgroup analyses and adjusted analyses, distinguishing  |
| 41 |                     |     | pre-specified from exploratory                                                                              |
| 42 |                     |     |                                                                                                             |
| 43 |                     |     |                                                                                                             |
| 44 |                     |     |                                                                                                             |
| 45 |                     |     |                                                                                                             |
| 46 |                     |     |                                                                                                             |
| 47 |                     |     |                                                                                                             |
| 48 |                     |     |                                                                                                             |
| 49 |                     |     |                                                                                                             |



|    |                          |    |                                                                                                                  |
|----|--------------------------|----|------------------------------------------------------------------------------------------------------------------|
| 1  |                          |    |                                                                                                                  |
| 2  | Harms                    | 19 | All important harms or unintended effects in each group (for specific guidance see CONSORT for harms)            |
| 3  |                          |    | 14                                                                                                               |
| 4  | <b>Discussion</b>        |    |                                                                                                                  |
| 5  | Limitations              | 20 | Trial limitations, addressing sources of potential bias, imprecision, and, if relevant, multiplicity of analyses |
| 6  | Generalisability         | 21 | Generalisability (external validity, applicability) of the trial findings                                        |
| 7  |                          |    | 14,15                                                                                                            |
| 8  | Interpretation           | 22 | Interpretation consistent with results, balancing benefits and harms, and considering other relevant evidence    |
| 9  |                          |    | 14-16                                                                                                            |
| 10 | <b>Other information</b> |    |                                                                                                                  |
| 11 | Registration             | 23 | Registration number and name of trial registry                                                                   |
| 12 | Protocol                 | 24 | Where the full trial protocol can be accessed, if available                                                      |
| 13 | Funding                  | 25 | Sources of funding and other support (such as supply of drugs), role of funders                                  |
| 14 |                          |    | 2-3, (repeated<br>18)                                                                                            |

\*We strongly recommend reading this statement in conjunction with the CONSORT 2010 Explanation and Elaboration for important clarifications on all the items. If relevant, we also recommend reading CONSORT extensions for cluster randomised trials, non-inferiority and equivalence trials, non-pharmacological treatments, herbal interventions, and pragmatic trials. Additional extensions are forthcoming: for those and for up to date references relevant to this checklist, see [www.consort-statement.org](http://www.consort-statement.org).



**Six Months of a Vegan Low-Carbohydrate (“Eco-Atkins”) Diet Improves Cardiovascular Risk Factors and Body Weight in Hyperlipidemic Adults: A Randomized Controlled Trial**

|                                 |                                                                                                                                                                                                                                                                                                                                                                                                                                                                                                                                                                                                                                                                                                                                                                                                                                                                                                                                                                                                                                                                                                                                                                                                                                                                                                           |
|---------------------------------|-----------------------------------------------------------------------------------------------------------------------------------------------------------------------------------------------------------------------------------------------------------------------------------------------------------------------------------------------------------------------------------------------------------------------------------------------------------------------------------------------------------------------------------------------------------------------------------------------------------------------------------------------------------------------------------------------------------------------------------------------------------------------------------------------------------------------------------------------------------------------------------------------------------------------------------------------------------------------------------------------------------------------------------------------------------------------------------------------------------------------------------------------------------------------------------------------------------------------------------------------------------------------------------------------------------|
| Journal:                        | <i>BMJ Open</i>                                                                                                                                                                                                                                                                                                                                                                                                                                                                                                                                                                                                                                                                                                                                                                                                                                                                                                                                                                                                                                                                                                                                                                                                                                                                                           |
| Manuscript ID:                  | bmjopen-2013-003505.R1                                                                                                                                                                                                                                                                                                                                                                                                                                                                                                                                                                                                                                                                                                                                                                                                                                                                                                                                                                                                                                                                                                                                                                                                                                                                                    |
| Article Type:                   | Research                                                                                                                                                                                                                                                                                                                                                                                                                                                                                                                                                                                                                                                                                                                                                                                                                                                                                                                                                                                                                                                                                                                                                                                                                                                                                                  |
| Date Submitted by the Author:   | 05-Nov-2013                                                                                                                                                                                                                                                                                                                                                                                                                                                                                                                                                                                                                                                                                                                                                                                                                                                                                                                                                                                                                                                                                                                                                                                                                                                                                               |
| Complete List of Authors:       | Jenkins, David; University of Toronto, Nutritional Sciences; St. Michael's Hospital, Clinical Nutrition & Risk Factor Modification Center<br>Wong, Julia; University of Toronto, Nutritional Sciences; St. Michael's Hospital, Clinical Nutrition & Risk Factor Modification Center<br>Kendall, Cyril; University of Toronto, Nutritional Sciences; St. Michael's Hospital, Clinical Nutrition & Risk Factor Modification Center<br>Esfahani, Amin; University of Toronto, Nutritional Sciences; St. Michael's Hospital, Clinical Nutrition & Risk Factor Modification Center<br>Ng, Vivian; University of Toronto, Nutritional Sciences; St. Michael's Hospital, Clinical Nutrition & Risk Factor Modification Center<br>Leong, Tracy; University of Toronto, Nutritional Sciences; St. Michael's Hospital, Clinical Nutrition & Risk Factor Modification Center<br>Faulkner, Dorothea; University of Toronto, Nutritional Sciences; St. Michael's Hospital, Clinical Nutrition & Risk Factor Modification Center<br>Vidgen, Ed; University of Toronto, Nutritional Sciences; St. Michael's Hospital, Clinical Nutrition & Risk Factor Modification Center<br>Paul, Gregory; Solae LLC,<br>Mukherjea, Ratna; Solae LLC,<br>Krul, Elaine; Solae LLC,<br>Singer, William; St. Michael's Hospital, Medicine |
| <b>Primary Subject Heading</b>: | Nutrition and metabolism                                                                                                                                                                                                                                                                                                                                                                                                                                                                                                                                                                                                                                                                                                                                                                                                                                                                                                                                                                                                                                                                                                                                                                                                                                                                                  |
| Secondary Subject Heading:      | Cardiovascular medicine                                                                                                                                                                                                                                                                                                                                                                                                                                                                                                                                                                                                                                                                                                                                                                                                                                                                                                                                                                                                                                                                                                                                                                                                                                                                                   |
| Keywords:                       | weight loss, diet, hyperlipidemia                                                                                                                                                                                                                                                                                                                                                                                                                                                                                                                                                                                                                                                                                                                                                                                                                                                                                                                                                                                                                                                                                                                                                                                                                                                                         |
|                                 |                                                                                                                                                                                                                                                                                                                                                                                                                                                                                                                                                                                                                                                                                                                                                                                                                                                                                                                                                                                                                                                                                                                                                                                                                                                                                                           |

SCHOLARONE™  
Manuscripts

1  
2  
3  
4  
5  
6  
7  
8  
9  
10  
11  
12  
13  
14  
15  
16  
17  
18  
19  
20  
21  
22  
23  
24  
25  
26  
27  
28  
29  
30  
31  
32  
33  
34  
35  
36  
37  
38  
39  
40  
41  
42  
43  
44  
45  
46  
47  
48  
49  
50  
51  
52  
53  
54  
55  
56  
57  
58  
59  
60

# Six Months of a Vegan Low-Carbohydrate (“Eco-Atkins”) Diet Improves Cardiovascular Risk Factors and Body Weight in Hyperlipidemic Adults: A Randomized Controlled Trial

David JA Jenkins, MD<sup>1-5</sup> Julia MW Wong, PhD<sup>1,3</sup> Cyril WC Kendall, PhD<sup>1,3</sup> Amin Esfahani,  
MSc<sup>1,3</sup> Vivian WY Ng, RD<sup>1,3</sup> Tracy CK Leong, BSc<sup>1,3</sup> Dorothea A Faulkner, PhD<sup>1,3</sup> Ed  
Vidgen, BSc<sup>1,3</sup> Gregory Paul, PhD<sup>6</sup> Ratna Mukherjea, PhD<sup>6</sup> Elaine S. Krul, PhD<sup>6</sup> William  
Singer, MD<sup>1-4</sup>

Departments of <sup>1</sup>Nutritional Sciences, <sup>2</sup>Medicine, Faculty of Medicine, University of Toronto,  
Toronto, Ontario, Canada; <sup>3</sup>Clinical Nutrition & Risk Factor Modification Center, St. Michael’s  
Hospital, Toronto, Ontario, Canada; <sup>4</sup>Department of Medicine, Division of Endocrinology and  
Metabolism, <sup>5</sup>Li Ka Shing Knowledge Institute, St. Michael’s Hospital, Toronto, Ontario,  
Canada; <sup>6</sup>Solae LLC, St. Louis, Missouri, USA

JMWW current affiliation is the New Balance Foundation Obesity Prevention Center, Boston Children’s  
Hospital, Boston, MA, USA, and Department of Pediatrics, Harvard Medical School, Boston, MA, USA.

AE current affiliation is New York Medical College, School of Medicine, Valhalla, NY, USA.

Address correspondence and reprint requests to David JA Jenkins, Clinical Nutrition and Risk  
Factor Modification Center, St. Michael’s Hospital, 61 Queen St. East, Toronto, Ontario,  
CANADA, M5C 2T2. Phone: (416) 978-4752; Fax: (416) 978-5310; EM:

[cyril.kendall@utoronto.ca](mailto:cyril.kendall@utoronto.ca)

**Manuscript Word Count:** 3,891

1  
2  
3 **Number of Tables:** 3

4  
5  
6 **Number of Figures:** 3

7  
8 **Number of References:** 59

9  
10 **Running Title:** Weight loss in hyperlipidemia on a vegan diet

11  
12 **Trial Registration:** #NCT00256516

13  
14  
15 **Keywords:** weight loss, vegetable proteins, nuts, soy, vegan diet, hyperlipidemia

16  
17  
18  
19  
20 **Contributions**

21  
22 *Conception and design* - Jenkins, Wong, Kendall, Faulkner, Paul, Mukherjea, Krul, Singer

23  
24 *Acquisition of data* - Jenkins, Wong, Kendall, Esfahani, Ng, Leong

25  
26 *Analysis and interpretation of data* – Jenkins, Wong, Kendall, Vidgen

27  
28 *Drafting of the manuscript* – Jenkins, Wong

29  
30 *Critical revision of the manuscript for important intellectual content* – Jenkins, Wong, Kendall,

31  
32 Esfahani, Ng, Leong, Faulkner, Vidgen, Paul, Mukherjea, Krul, Singer

33  
34 *Statistical analysis* - Vidgen

35  
36 *Obtaining funding* – Jenkins, Kendall, Wong

37  
38 *Administrative, technical, or material support* – Wong, Kendall, Esfahani, Ng, Leong, Faulkner

39  
40 *Supervision* – Jenkins, Kendall, Wong, Singer

41  
42  
43  
44  
45 *No additional contributions* - Paul, Mukherjea, Krul

## Abstract

**Objective:** Low-carbohydrate diets may be useful for weight loss. Diets high in vegetable proteins and oils may reduce the risk of coronary heart disease (CHD). The main objective was to determine the longer term effect of a diet that was both low-carbohydrate and plant-based on weight loss and LDL-C.

**Design, Setting, Participants:** A parallel design study of 39 overweight hyperlipidemic men and postmenopausal women conducted at a Canadian university-affiliated hospital nutrition research center from April 2005 to November 2006.

**Intervention:** Participants were advised to consume either a low-carbohydrate vegan diet or a high-carbohydrate lacto-ovo vegetarian diet for six-months after completing one-month metabolic (all foods provided) versions of these diets. The prescribed macronutrient intakes for the low- and high-carbohydrate diets were: 26% and 58% of energy from carbohydrate, 31% and 16% from protein and 43% and 25% from fat, respectively.

**Primary Outcome:** Change in body weight.

**Results:** Twenty-three participants (50% test, 68% control) completed the six-month ad libitum study. The approximate 4kg weight loss on the metabolic study was increased to -6.9kg on low-carbohydrate and -5.8kg on high-carbohydrate six-month ad libitum treatments (treatment difference [95% CI]: -1.1kg [-2.1, 0.0],  $P=0.047$ ). The relative LDL-C and triglyceride reductions were also greater on the low-carbohydrate treatment (treatment difference [95% CI]: -0.49mmol/L [-0.70, -0.28],  $P<0.001$  and -0.34mmol/L [-0.57, -0.11],  $P=0.005$ , respectively), as were the TC:HDL-C and apolipoprotein B:A1 ratios (-0.57 [-0.83, -0.32],  $P<0.001$  and -0.05 [-0.09, -0.02],  $P=0.003$ , respectively).

1  
2  
3 **Conclusions:** A self-selected low-carbohydrate vegan diet, containing increased protein and fat  
4  
5 from gluten and soy products, nuts, and vegetable oils, had lipid lowering advantages over a  
6  
7 high-carbohydrate, low-fat weight loss diet, thus improving heart disease risk factors.  
8  
9

10  
11  
12 **Trial Registration:** clinicaltrials.gov (<http://www.clinicaltrials.gov/>), #NCT00256516  
13  
14

15  
16  
17 **Abstract Word Count:** 273 (up to 300 allowed)  
18  
19  
20  
21  
22  
23  
24  
25  
26  
27  
28  
29  
30  
31  
32  
33  
34  
35  
36  
37  
38  
39  
40  
41  
42  
43  
44  
45  
46  
47  
48  
49  
50  
51  
52  
53  
54  
55  
56  
57  
58  
59  
60

## Article Summary

### Article Focus

- Low-carbohydrate diets may be useful for weight loss. Diets high in vegetable proteins and oils may reduce the risk of coronary heart disease (CHD).
- The objective of the randomized clinical trial was to determine the longer term effect of a diet that was both low-carbohydrate and plant-based on weight loss and LDL-C.
- We have already reported the effect of this dietary strategy in producing a difference of 8% in LDL-C reduction between calorie-restricted diets (60% of estimated calorie requirements) when all food was provided. We now report findings after these same participants continued on their respective diets for an additional 6 months, under self-selected conditions, in order to gain insights into the real life effectiveness of this diet.

### Key Messages

- By comparison with the high-carbohydrate diet, consumption of the low-carbohydrate diet containing vegetable proteins and oils was also associated with significantly reduced concentrations of LDL-C. This LDL-C reduction has not been reported for other low-carbohydrate diet studies in which a large part of the protein and fat originated from animal sources.
- The present study also demonstrated that consumption of a low-carbohydrate vegan diet resulted in modestly greater body weight reductions compared to a high-carbohydrate diet (7% versus 6% reductions, respectively) over a six-month ad libitum period.

- 1  
2  
3 - The sustained reduction in LDL-C, associated with only a small incremental weight loss on  
4 the 6-month self-selected diet, is a potentially important attribute of the diet in reducing long-  
5 term CHD risk  
6  
7  
8  
9

### 10 11 12 **Strengths and Limitations of this Study**

13  
14  
15 The study weaknesses include the relatively small sample size and the high dropout rate.

16  
17 Nevertheless, high dropout rates have been reported in similar dietary studies and it is  
18 noteworthy that attrition rates were low in the metabolic study when all food was provided [1].

19  
20 Food availability and preparation may therefore be important factors. For those who did  
21 complete the study, however, there were benefits in weight loss and LDL-C reduction, an  
22 additional 2% advantage in body weight reduction compared to the high-carbohydrate diet and a  
23 13% drop in LDL-C for participants consuming a more plant-based low-carbohydrate diet.  
24  
25  
26  
27  
28

29  
30 The study's strength is that the prescribed hypocaloric diet was self-selected, meaning the results  
31 are more in line with what can be expected under free-living conditions. The breadth of  
32 application of the plant-based low-carbohydrate diet, however, remains to be determined, but it  
33 may provide an option for some individuals for whom LDL-C reduction is an equal concern to  
34 weight loss. If low-carbohydrate dietary options become more generally available the number of  
35 individuals who will benefit is likely to increase.  
36  
37  
38  
39  
40  
41  
42  
43  
44  
45  
46  
47  
48  
49  
50  
51  
52  
53  
54  
55  
56  
57  
58  
59  
60



## Introduction

Many popular weight loss diets emphasize carbohydrate restriction (Atkins, Eddies, South Beach, Zone). Their success is determined by the level of compliance with the prescribed diets [2-7]. However, a high content of animal products, rich in saturated fat and cholesterol, may make conventional low-carbohydrate diets less appropriate for those with hypercholesterolemia [3 8]. Even during active weight loss, these high saturated fat diets do not lower serum LDL-C below baseline [3 8] and there is concern that if such diets continue to be eaten when weight loss has ceased, a more atherogenic blood lipid profile may result [9]. These concerns have prompted exploration of other weight loss strategies, but only modest reductions in LDL-C have been observed [10].

By contrast vegan diets significantly lower LDL-C [11]. Trials of vegan and vegetarian diets also reduce progression of coronary heart disease (CHD) [12] and improve diabetes control [13].

Plant food components such as vegetable proteins, vegetable oils, nuts and viscous fibers, reduce serum lipids in many studies [14-19] and may increase flow mediated vasodilatation [20-23].

Nuts, fiber and vegetarian diets in general, all reduce CHD and diabetes in cohort studies [24-29]. Finally, in cohort studies, low-carbohydrate diets, high in vegetable oils and proteins as opposed to animal products, reduce CHD events and diabetes incidence in women [30 31], while lower red meat intake reduces total, cardiovascular and cancer mortality [32]. Most recently a large randomized controlled trial confirmed the effect of nuts and increased vegetable oil (olive oil) intake in reducing cardiovascular events in the context of a Mediterranean diet [33].

In view of the apparent success of low-carbohydrate diets for weight loss and the demonstration that relatively high-carbohydrate vegetarian and vegan diets, and diets low in animal products, lower CHD risk factors [34-37], we designed a diet that combined both vegan and low-

1  
2  
3 carbohydrate elements to determine whether such a diet captured both the weight loss and CHD  
4 risk reduction advantages. We have already reported the effect of this dietary strategy in  
5 producing a difference of 8% in LDL-C reduction between calorie-restricted diets (60% of  
6 estimated calorie requirements) when all food was provided [1]. We now report findings after  
7 these same participants continued on their respective diets for an additional 6 months, under self-  
8 selected conditions, in order to gain insights into the real life effectiveness of this diet. The  
9 results of the metabolic (all foods provided) study have been reported previously and had  
10 demonstrated a CHD risk factor advantage, but with no greater weight loss than the control diet  
11 [1].  
12  
13  
14  
15  
16  
17  
18  
19  
20  
21  
22  
23  
24  
25  
26

## 27 **Methods**

### 28 **Participants**

29  
30 Forty-seven overweight participants, recruited by newspaper advertisement and hospital clinic  
31 notices, undertook the one-month metabolic first phase of the study (Figure 1) that has been  
32 previously reported [1]. At the start of the study, participants were given the option to participate  
33 in both the metabolic and ad libitum phases or only the metabolic phase. On completion of the  
34 metabolic phase, thirty-nine participants (19 control and 20 test participants) continued for an ad  
35 libitum six-month study (Table 1). The study was conducted at a Canadian university-affiliated  
36 hospital nutrition research center from April 2005 to November 2006. All participants had high  
37 normal to raised LDL-C levels ( $>3.4\text{mmol/L}$  at diagnosis) and a body mass index  $> 27\text{ kg/m}^2$ .  
38 Details of the eligibility criteria have been previously reported [1]. After recruitment, the 11/39  
39 participants who were taking lipid lowering medications discontinued their medications at least  
40 two weeks prior to starting and for the study duration (Table 1).  
41  
42  
43  
44  
45  
46  
47  
48  
49  
50  
51  
52  
53  
54  
55  
56  
57  
58  
59  
60

## Study Protocol

The intervention was a randomized parallel study stratified by sex in which participants were randomized to either low- or high-carbohydrate, calorie-reduced diets. The first month was the previously reported metabolically controlled study [1]. For the following six-months, participants continued on the diet to which they had been assigned as a self-selected (ad libitum) diet.

Anthropometric, blood pressure and blood lipid measurements were repeated at monthly intervals. Insulin and HbA1c were measured at baseline and at the start and end of the ad libitum treatment. Percentage body fat was measured at baseline and end of the ad libitum treatment by bioelectrical impedance (Quantum II; RJL Systems, Clinton Township, Michigan). Seven-day diet and exercise histories were recorded in the week prior to each monthly visit. These histories were reviewed and discussed with the dietitian and appropriate dietary counselling was provided to enhance adherence. The overall feeling of satiety for the previous week was assessed at each study visit using a 9-point bipolar semantic scale, where -4 was extremely hungry, 0 was neutral, and +4 was uncomfortably full [1 35]. No exercise advice was given during the study, but alterations in exercise were allowed and recorded.

The Ethics Committees of St. Michael's Hospital and the University of Toronto, and the Therapeutic Products Directorate of Health Canada approved the study. Written informed consent was obtained from the participants. The study's clinical trial registration number was #NCT00256516.

## Diets

1  
2  
3 As with the previous metabolic study, participants were encouraged to eat only 60% of their  
4  
5  
6  
7  
8  
9  
10  
11  
12  
13  
14  
15  
16  
17  
18  
19  
20  
21  
22  
23  
24  
25  
26  
27  
28  
29  
30  
31  
32  
33  
34  
35  
36  
37  
38  
39  
40  
41  
42  
43  
44  
45  
46  
47  
48  
49  
50  
51  
52  
53  
54  
55  
56  
57  
58  
59  
60

As with the previous metabolic study, participants were encouraged to eat only 60% of their estimated caloric requirements in order to continue the body weight reduction started on their metabolic phase [38-40]. The prescribed test diet was a low-carbohydrate vegan diet containing 26% of calories from carbohydrate, 31% of calories from vegetable proteins and 43% from fat (primarily vegetable oils). Carbohydrate sources on the low-carbohydrate diet featured viscous fiber-containing foods (such as oats and barley) and low-starch vegetables (emphasizing okra and eggplant) for the relatively limited amount of carbohydrate allowed. The vegetable proteins were prescribed as gluten (54.8% of total protein), soy (23.0%), fruits and vegetables (8.7%), nuts (7.5%), and cereals (6.0%). Gluten was contained in the nut bread and wheat gluten (also called “seitan”) products. Soy protein was present in the form of burgers, veggie bacon, deli slices, breakfast links, tofu, and soy milks. Nuts included almonds, cashews, hazelnuts, macadamia, pecans, and pistachios. The fat sources were nuts (43.6% of total fat), vegetable oils (24.4%), soy products (18.5%), avocado (7.1%), cereals (2.7%), fruits and vegetables (2.3%), and seitan products (1.4%). Participants were able to purchase at the research center the “no” starch high protein nut bread and three of the seitan (wheat gluten) products used in the study which were not available in Canada. The control, high-carbohydrate lacto-ovo vegetarian diet (58% carbohydrate, 16% protein and 25% fat) emphasized whole wheat cereals and cereal fiber, as well as low-fat or skim milk dairy products and liquid egg substitute to reduce saturated fat and cholesterol intakes. These diets have been published previously [1]. Participants were given a copy of the menu plans that outlined the food items and amounts prescribed during the metabolic phase. This served as a reference during the ad libitum phase. Furthermore, participants were given an exchange list of the items prescribed on the menu plan. The goal was to enhance adherence.

1  
2  
3 Self-taring electronic scales (My Weigh Scales, Vancouver, BC or Tanita Corporation, Arlington  
4 Heights, IL) were provided to all participants and they were instructed to weigh all food items  
5 while recording the seven-day food diary in the week prior to monthly clinic visits. Adherence to  
6 the three principal cholesterol-lowering components [vegetable proteins (soy and gluten), nuts,  
7 and viscous fibers] of the low-carbohydrate diet was assessed from the completed monthly  
8 seven-day food records. The amount of each component provided during the metabolic phase  
9 remained the same as that prescribed during the ad libitum phase.

10  
11  
12  
13  
14  
15  
16  
17  
18  
19  
20 Neither the dietitians nor participants could be blinded, but equal emphasis was placed on the  
21 potential importance for health of both diets. The analytical technicians were blinded to diet  
22 allocation, as was the statistician, up to analysis of the primary outcome. Participants were  
23 offered no financial compensation for participation in the study.  
24  
25  
26  
27  
28  
29  
30  
31

### 32 **Analyses**

33  
34 The analytical techniques have been reported previously [1]. Serum was analyzed in the J. Alick  
35 Little Lipid Research Laboratory [35] and LDL-C (in mmol/L) was calculated by the method of  
36 Friedewald et al. [1]. The methods for analyzing apolipoproteins A1 and B, high sensitivity C-  
37 reactive protein (hs-CRP), blood glucose, insulin, HbA1c, and homeostasis model assessment –  
38 insulin resistance model (HOMA-IR) have been described previously [1]. Exercise data were  
39 calculated as metabolic equivalents (METs) [41]. The absolute 10-year CHD risk score was  
40 calculated using the Framingham risk equation [42].  
41  
42  
43  
44  
45  
46  
47  
48  
49

50 Diets were assessed for macronutrients, fatty acids, cholesterol and fiber using a computer  
51 program based on the USDA database [43] and developed in our laboratory to allow the addition  
52 of the macronutrient content of study foods obtained from food labels or directly from food  
53  
54  
55  
56  
57  
58  
59  
60

1  
2  
3 manufacturers. The nutritional profiles of the diets were calculated from the 7-day food records  
4 completed once a month throughout the study and mean intakes are presented.  
5  
6

7  
8 Adherence with the three principal cholesterol-lowering components [vegetable proteins (soy  
9 and gluten), nuts, and viscous fibers] of the low-carbohydrate diet was estimated from the 7-day  
10 food records by applying 33.3% adherence factor to the recorded intake for each of the three  
11 main components. The sum of the three components if consumed as prescribed would equal  
12 100% adherence.  
13  
14  
15  
16  
17  
18  
19

## 20 21 22 **Statistical Analyses**

23  
24 Results are expressed as means  $\pm$  SEM or 95% confidence intervals (CIs). Time zero was used as  
25 the baseline and refers to the pre-metabolic study baseline [1]. Treatment differences in physical  
26 and biochemical measures were assessed using all available data and a repeated measures mixed  
27 model accounting for time of assessment (SAS 9.2) [44] in the Tables (Table 2 and 3) and the  
28 Results. The response variable was change from baseline, with diet and week as fixed effects and  
29 subject ID nested in diet. There was no adjustment for baseline. Any participant who started the  
30 ad libitum treatment was included in the analysis (N=39). The completer analysis included the 23  
31 participants who completed the study.  
32  
33

34 Multiple imputation (taking the mean of 5 sets of randomly imputed values) was used to present  
35 baseline and treatment values in the Tables (2 and 3) and Figures (2 and 3) by generating data for  
36 those who dropped out or had missing values [44].  
37  
38  
39  
40  
41  
42

## 43 44 45 46 47 48 49 50 51 52 53 **Results**

1  
2  
3 Compliance with the major dietary components [vegetable proteins (soy and gluten), nuts, and  
4 viscous fibers] was 33.6% or one-third of that prescribed during the metabolic phase (Table 2).  
5  
6 Saturated fat intakes were similar on both treatments whereas intake of monounsaturated fats,  
7  
8 vegetable proteins, and soy protein were significantly higher on the low-carbohydrate diet (Table  
9  
10 2). Available carbohydrate intake was significantly lower on the low-carbohydrate diet (Table 2).  
11  
12 The attrition rate was 50% (10/20) on the low-carbohydrate and 32% (6/19) on the high-  
13  
14 carbohydrate (Figure 1), this equates to a total attrition rate of 41% (16/39). The number of  
15  
16 participants who did not complete the study (including dropouts and withdrawals) did not differ  
17  
18 between treatments. Three participants were withdrawn by the study physician due to failure to  
19  
20 attain LDL-C targets on the low-carbohydrate diet (mean LDL-C = 5.24mmol/L) and one subject  
21  
22 on the high-carbohydrate diet (LDL-C = 7.78mmol/L). Participants on the low-carbohydrate diet  
23  
24 tended to have larger reductions in body weight over time (Figure 2). The weight loss from  
25  
26 baseline to the end of the 6-month ad libitum treatment was -6.9kg [95% CI, -7.7, -6.1] on the  
27  
28 low-carbohydrate and -5.8kg [95% CI, -6.6, -5.1] on the control diet with a significant difference  
29  
30 between groups (treatment difference [95% CI]: -1.1kg [-2.1, 0.0]; P=0.047) (Table 3). The final  
31  
32 reduction in BMI was also greater on the low-carbohydrate versus high-carbohydrate diet  
33  
34 (treatment difference [95% CI]: -0.4kg/m<sup>2</sup> [-0.8, 0.0]; P=0.039) (Table 3). Among the  
35  
36 completers, there were numerically larger differences between treatments for both body weight  
37  
38 and BMI (treatment difference [95% CI]: -1.8 kg [-3.0, -0.6]; P=0.0041 and -0.7 kg/m<sup>2</sup> [-1.1, -  
39  
40 0.2]; P=0.0039, respectively).  
41  
42  
43  
44  
45  
46  
47  
48  
49

50 There was a relative increase in recorded exercise by the high-carbohydrate diet participants,  
51  
52 whereas there was no relative change in the low-carbohydrate participants (treatment difference  
53  
54 [95% CI]: -9.3 [-16.4, -2.2] METs; P=0.012), but this was not reflected in a greater weight loss  
55  
56  
57  
58  
59  
60

1  
2  
3 (Table 3). There were no treatment differences in percent body fat, waist circumference or satiety  
4  
5  
6 (Table 3).  
7  
8  
9

## 10 **Lipids**

11  
12 At the end of the study, the reduction on the low-carbohydrate versus high-carbohydrate diet was  
13  
14 greater for LDL-C (treatment difference [95% CI]: -0.49mmol/L [-0.70, -0.28]; P<0.001, for TC  
15  
16 (-0.62mmol/L [-0.86, -0.37]; P<0.001, for TC:HDL-C -0.57 [-0.83, -0.32]; P<0.001, for LDL-  
17  
18 C:HDL-C (-0.42 [-0.60, -0.24]; P<0.001, and for triglycerides (-0.34mmol/L [-0.57, -0.11];  
19  
20 P=0.005). No treatment difference was seen in HDL-C (Table 3). A similar pattern was observed  
21  
22 in the completers. The treatment difference was numerically larger for LDL-C (-0.60mmol/L [-  
23  
24 0.84, -0.36]; P<0.0001), TC (-0.73mmol/L [-1.00, -0.45]; P<0.0001), TC:HDL-C (-0.68 [-0.97, -  
25  
26 0.39]; P<0.0001), and LDL-C:HDL-C (-0.53 [-0.73, -0.32]; P<0.0001). Values for LDL-C and  
27  
28 the TC:HDL-C ratio were consistently lower in participants on the low-carbohydrate diet  
29  
30 throughout the study while HDL-C values were not different from baseline (Figure 3 A-C).  
31  
32  
33  
34  
35  
36  
37  
38

## 39 **Apolipoproteins**

40  
41 ApoB and the ApoB:A1 ratio were reduced more on the low- versus the high-carbohydrate diet  
42  
43 at the end of the study (treatment different [95% CI]: -0.11g/L [-0.16, -0.06]; P<0.001 and -0.05  
44  
45 [-0.09, -0.02]; P=0.003, respectively) (Table 3). No significant difference between the diets was  
46  
47 observed for ApoA1 concentrations. The pattern of change in the apolipoproteins in the  
48  
49 completers reflected the changes seen in the whole group. Figure 3D and 3F show that the low-  
50  
51 carbohydrate diet resulted in lower apoB and ApoB:ApoA1 ratios relative to baseline over the  
52  
53 course of the study.  
54  
55  
56  
57  
58  
59  
60



## **C-Reactive Protein, HbA1c, Blood Glucose, Serum Insulin, Insulin Resistance and Blood Pressure**

Both treatments reduced hs-CRP with no difference between treatments (Table 3). HbA1c, fasting blood glucose, insulin, and insulin resistance (calculated using the HOMA model) fell similarly on both treatments during the course of the study (Table 3). Systolic and diastolic blood pressure decreased similarly with no treatment differences (Table 3). The completers also failed to show a difference between treatments.

## **Calculated CHD Risk**

The low-carbohydrate diet significantly reduced the calculated 10-year CHD risk relative to the high-carbohydrate diet (2% [-2, -1];  $P < 0.001$ ) (Table 3). A reduced CHD risk on the low-carbohydrate diet was also observed in the completers (2% [-3, -1];  $P < 0.001$ ).

## **Adverse Events**

No serious adverse events or events that involved hospitalisation occurred during the study.

## **Discussion**

The present study demonstrated that consumption of a low-carbohydrate vegan diet resulted in a modestly greater body weight reduction compared to a high-carbohydrate diet (7% versus 6% reductions, respectively) over a six-month ad libitum period. These reductions were similar to those reported for low-carbohydrate “Atkins-like” diets [2 3 6 10]. However by comparison with the high-carbohydrate diet, consumption of the low-carbohydrate diet containing vegetable

1  
2  
3 proteins and oils was also associated with significantly reduced concentrations of LDL-C. This  
4  
5 LDL-C reduction has not been reported for other low-carbohydrate diet studies in which a large  
6  
7 part of the protein and fat originated from animal sources and in which no significant LDL-C  
8  
9 reductions were seen [2-6 8]. The sustained reduction in LDL-C, associated with only a small  
10  
11 incremental weight loss on the 6-month self-selected diet, is a potentially important attribute of  
12  
13 the diet in reducing long-term CHD risk [45 46]. Furthermore, as seen in the present study, a  
14  
15 low-carbohydrate diet, in which vegetable fat and protein options were encouraged,  
16  
17 demonstrated a larger reduction in the TC:HDL-C ratio than that reported at 6 months in weight  
18  
19 loss studies employing either a Mediterranean or a high-carbohydrate diet [10].

20  
21 The majority of studies undertaken to date have been 6 months to one year in duration [2-6 47]  
22  
23 with more recent studies of up to 2 years [2 8] and, as with the present study, a number of these  
24  
25 studies had a high dropout rate [2 3 5 47]. The high dropout rate in the present study did not  
26  
27 prevent identification of significant LDL-C and body weight differences in the intent-to-treat  
28  
29 analysis (using all available data). However, the completer data demonstrated an even larger  
30  
31 treatment difference in LDL-C favoring the low-carbohydrate treatment . Those on the low-  
32  
33 carbohydrate diet showed overall adherence to the major dietary components [vegetable proteins  
34  
35 (soy and gluten), nuts, and viscous fibers] at 33.6% of that provided during the metabolic phase  
36  
37 [1]. This adherence is similar to the 43.3% seen with the dietary portfolio in the comparison of  
38  
39 the metabolic one month [35] and the ad libitum six month studies [48]. In this comparison also  
40  
41 just under half the LDL-C reduction (13-14%) seen on the ad libitum compared to the metabolic  
42  
43 study [35].  
44  
45  
46  
47  
48  
49  
50  
51

52  
53 The effect of low-carbohydrate diets on CHD events has not been assessed in randomized  
54  
55 controlled trials. Nevertheless, low-carbohydrate diets high in vegetable proteins and oils have  
56  
57  
58  
59  
60

1  
2  
3 been associated with a 30% reduced CHD risk and an 18% reduced incidence of diabetes in  
4 cohort studies [30 31]. The median interquartile difference in these studies between the first and  
5  
6 10<sup>th</sup> decile for vegetable protein and monounsaturated fat (MUFA) intakes, as a marker of  
7  
8 increased vegetable oil consumption, was 1.4% and 9.3% expressed as a percentage of total  
9  
10 caloric intake [30]. These figures compare with a 8.2% and a 4.6% relative increase in vegetable  
11  
12 protein and oil consumption from baseline on the Eco-Atkins diet compared to the control diet.  
13  
14 The increases in MUFA were therefore seen in both studies. Recently a Spanish Mediterranean  
15  
16 diet emphasizing increased nut or olive oil consumption, increasing monounsaturated fat intake  
17  
18 by 2-3%, has been shown to significantly reduce cardiovascular events also by approximately  
19  
20 30% [33]. These data provide consistent support for the view that the Eco-Atkins approach  
21  
22 would reduce CHD risk in the long term.  
23  
24  
25  
26  
27  
28

29 The present diet, while lowering LDL-C by 9%, did not result in any significant depression of  
30  
31 HDL-C. Lowering LDL-C while maintaining HDL-C would be expected to reduce CHD risk [45  
32  
33 46]. Similarly, reductions in ApoB and the ApoB:A1 ratio were also observed in the present  
34  
35 study. These findings further support the potential CHD benefit that this weight loss diet may  
36  
37 have [49-51]. It has also been claimed that apolipoproteins may be stronger predictors of CHD  
38  
39 events than conventional lipid variables [52-54].  
40  
41  
42  
43

44 In contrast to the metabolic study, the reductions in systolic and diastolic blood pressure were not  
45  
46 significant between the low- and high-carbohydrate diets. Similarly, hs-CRP was unchanged  
47  
48 between treatments, however, the level was significantly reduced with the low-carbohydrate diet  
49  
50 compared to baseline. Studies have shown that hs-CRP tended to be lowest on the diets  
51  
52 containing the highest proportion of carbohydrate [5]. Low glycemic index and low glycemic  
53  
54 load diets have also been associated with lower hs-CRP concentrations [55 56]. These  
55  
56  
57  
58  
59  
60

1  
2  
3 advantages of the higher carbohydrate diet may have reduced any hs-CRP difference between the  
4  
5 two diets in the present study.  
6

7  
8 Soy-containing foods as well as nuts have cholesterol lowering effects [15 17 18 57 58] and may  
9  
10 explain the reduction in LDL-C. Viscous fiber in low starch vegetables and  $\beta$ -glucan in oats and  
11  
12 barley may also have contributed to the overall cholesterol lowering effect of the diet [9 14 45].  
13  
14 Furthermore, nuts and high fiber food consumption have been associated with lower body weight  
15  
16 [59].  
17

18  
19 The study weaknesses include the relatively small sample size and the high dropout rate.  
20

21  
22 Nevertheless, high dropout rates have been reported in similar dietary studies and it is  
23  
24 noteworthy that attrition rates were low in the metabolic study when all food was provided [1].  
25

26  
27 Food availability and preparation may therefore be important factors. Future studies will need to  
28  
29 focus on strategies to increase and maintain adherence, especially to the cholesterol lowering  
30  
31 components, which all bear US FDA health claims for cardiovascular disease risk reduction.  
32

33  
34 Furthermore, collaboration with food industry may be helpful in addressing concerns of  
35  
36 availability, variety, and ease of preparation. In retrospect, a simplified one page eating plan for  
37  
38 breakfast, lunch, and dinner with a number of options and amounts for each meal, as we have  
39  
40 used in our dietary portfolio studies, might also be helpful [48]. For those who did complete the  
41  
42 study, however, there were benefits in weight loss and LDL-C reduction, an additional 2%  
43  
44 advantage in body weight reduction compared to the high-carbohydrate diet and a 13% drop in  
45  
46 LDL-C for participants consuming a more plant-based low-carbohydrate diet. Unfortunately it  
47  
48 was not possible to predict who would complete the diet based on pre-study data or changes  
49  
50 observed during the metabolic phase.  
51  
52  
53  
54  
55  
56  
57  
58  
59  
60

1  
2  
3 The study's strength is that the prescribed hypocaloric diet was self-selected, meaning the results  
4 are more in line with what can be expected under free-living conditions. The breadth of  
5 application of the plant-based low-carbohydrate diet, however, remains to be determined, but it  
6 may provide an option for some individuals for whom LDL-C reduction is an equal concern to  
7 weight loss. If low-carbohydrate dietary options become more generally available the number of  
8 individuals who will benefit is likely to increase.  
9

10 We conclude that a weight loss diet which reduced carbohydrate in exchange for increased  
11 intakes of vegetable sources of protein, such as gluten, soy and nuts, together with vegetable oils  
12 offers an opportunity to improve both LDL-C and body weight, both being risk factors for CHD.  
13 Further trials are warranted to evaluate low-carbohydrate diets, including more plant-based low-  
14 carbohydrate diets, on CHD risk factors and ultimately on CHD.  
15  
16  
17  
18  
19  
20  
21  
22  
23  
24  
25  
26  
27  
28  
29  
30  
31  
32  
33  
34  
35  
36  
37  
38  
39  
40  
41  
42  
43  
44  
45  
46  
47  
48  
49  
50  
51  
52  
53  
54  
55  
56  
57  
58  
59  
60

## Acknowledgements

We thank all the study participants for their attention to detail and enthusiasm.

Dr. Jenkins, together with those responsible for analysis and interpretation of data, had full access to all the data in the study and takes responsibility for the integrity of the data and the accuracy of the data analysis.

## Sources of Funding

This study was supported by Solae, LLC; Loblaw Companies Limited, and the Canada Research Chair Program of the Federal Government of Canada. Dr. Wong was a recipient of a Canadian Institutes of Health Research (CIHR) Doctoral Research Award, and is now a holder of a CIHR Randomized Controlled Trials – Mentoring Program Training Grant.

## Role of the Sponsors

None of the funding organizations or sponsors played any significant role in the design and conduct of the study, in the collection, management, analysis, and interpretation of the data, or in the preparation, or approval of the manuscript. However, the named co-authors from Solae LLC reviewed the manuscript.

## Disclosures

Dr. Jenkins has served on the Scientific Advisory Board of Sanitarium Company, Agri-Culture and Agri-Food Canada (AAFC), Canadian Agriculture Policy Institute (CAPI), California Strawberry Commission, Loblaw Supermarket, Herbal Life International, Nutritional Fundamental for Health, Pacific Health Laboratories, Metagenics, Bayer Consumer Care, Orafti,

1  
2  
3 Dean Foods, Kellogg's, Quaker Oats, Procter & Gamble, Coca-Cola, NuVal Griffin Hospital,  
4  
5 Abbott, Pulse Canada, Saskatchewan Pulse Growers, and Canola Council of Canada; received  
6  
7 honoraria for scientific advice from Sanitarium Company, Orafti, the Almond Board of  
8  
9 California, the American Peanut Council, International Tree Nut Council Nutrition Research and  
10  
11 Education Foundation and the Peanut Institute, Herbal Life International, Pacific Health  
12  
13 Laboratories, Nutritional Fundamental for Health, Barilla, Metagenics, Bayer Consumer Care,  
14  
15 Unilever Canada and Netherlands, Solae LLC, Oldways, Kellogg's, Quaker Oats, Procter &  
16  
17 Gamble, Coca-Cola, NuVal Griffin Hospital, Abbott, Canola Council of Canada, Dean Foods,  
18  
19 California Strawberry Commission, Haine Celestial, Pepsi, and Alpro Foundation; has been on  
20  
21 the speakers panel for the Almond Board of California; received research grants from  
22  
23 Saskatchewan Pulse Growers, the Agricultural Bioproducts Innovation Program (ABIP) through  
24  
25 the Pulse Research Network (PURENet), Advanced Food Materials Network (AFMNet),  
26  
27 Loblaw, Unilever, Barilla, Almond Board of California, Coca-Cola, Solae LLC, Haine Celestial,  
28  
29 Sanitarium Company, Orafti, International Tree Nut Council Nutrition Research and Education  
30  
31 Foundation and the Peanut Institute, the Canola and Flax Councils of Canada, Calorie Control  
32  
33 Council, Canadian Institutes of Health Research, Canada Foundation for Innovation, and the  
34  
35 Ontario Research Fund; and received travel support to meetings from the Solae LLC, Sanitarium  
36  
37 Company, Orafti, AFMNet, Coca-Cola, The Canola and Flax Councils of Canada, Oldways  
38  
39 Preservation Trust, Kellogg's, Quaker Oats, Griffin Hospital, Abbott Laboratories, Dean Foods,  
40  
41 the California Strawberry Commission, American Peanut Council, Herbal Life International,  
42  
43 Nutritional Fundamental for Health, Metagenics, Bayer Consumer Care, AAFC, CAPI, Pepsi,  
44  
45 Almond Board of California, Unilever, Alpro Foundation, International Tree Nut Council,  
46  
47 Barilla, Pulse Canada, and the Saskatchewan Pulse Growers. Dr Jenkins' wife is a director of  
48  
49  
50  
51  
52  
53  
54  
55  
56  
57  
58  
59  
60

1  
2  
3 Glycemic Index Laboratories, Toronto, Ontario, Canada. Dr. Kendall reported being on speakers  
4  
5 bureaus for Almond Board of California, Solae LLC, and Unilever; and receiving research grants  
6  
7  
8 from CIHR, Unilever, Solae LLC, Loblaw Brands Ltd, International Tree Nut Council, and  
9  
10 Almond Board of California. Mr. Vidgen has received partial salary funding from research  
11  
12 grants provided by Unilever, Loblaws, and the Almond Board of California. Drs. Paul,  
13  
14 Mukherjea, and Krul are employees of Solae, LLC.  
15  
16  
17  
18  
19  
20  
21  
22  
23  
24  
25  
26  
27  
28  
29  
30  
31  
32  
33  
34  
35  
36  
37  
38  
39  
40  
41  
42  
43  
44  
45  
46  
47  
48  
49  
50  
51  
52  
53  
54  
55  
56  
57  
58  
59  
60



## References

1. Jenkins DJ, Wong JM, Kendall CW, et al. The effect of a plant-based low-carbohydrate ("Eco-Atkins") diet on body weight and blood lipid concentrations in hyperlipidemic subjects. *Arch Intern Med* 2009;**169**(11):1046-54 doi: 10.1001/archinternmed.2009.115[published Online First: Epub Date]].
2. Samaha FF, Iqbal N, Seshadri P, et al. A low-carbohydrate as compared with a low-fat diet in severe obesity. *N Engl J Med* 2003;**348**(21):2074-81
3. Foster GD, Wyatt HR, Hill JO, et al. A randomized trial of a low-carbohydrate diet for obesity. *N Engl J Med* 2003;**348**(21):2082-90
4. Stern L, Iqbal N, Seshadri P, et al. The effects of low-carbohydrate versus conventional weight loss diets in severely obese adults: one-year follow-up of a randomized trial. *Ann Intern Med* 2004;**140**(10):778-85
5. Dansinger ML, Gleason JA, Griffith JL, et al. Comparison of the Atkins, Ornish, Weight Watchers, and Zone diets for weight loss and heart disease risk reduction: a randomized trial. *JAMA* 2005;**293**(1):43-53
6. Gardner CD, Kiazand A, Alhassan S, et al. Comparison of the Atkins, Zone, Ornish, and LEARN diets for change in weight and related risk factors among overweight premenopausal women: the A TO Z Weight Loss Study: a randomized trial. *JAMA* 2007;**297**(9):969-77
7. Sacks FM, Bray GA, Carey VJ, et al. Comparison of weight-loss diets with different compositions of fat, protein, and carbohydrates. *N Engl J Med* 2009;**360**(9):859-73 doi: 10.1056/NEJMoa0804748[published Online First: Epub Date]].

- 1  
2  
3 8. Foster GD, Wyatt HR, Hill JO, et al. Weight and metabolic outcomes after 2 years on a low-  
4 carbohydrate versus low-fat diet: a randomized trial. *Ann Intern Med* 2010;**153**(3):147-57  
5  
6 doi: 10.1059/0003-4819-153-3-201008030-00005[published Online First: Epub Date]].  
7  
8
- 9  
10 9. Anderson JW, Randles KM, Kendall CW, et al. Carbohydrate and fiber recommendations for  
11 individuals with diabetes: a quantitative assessment and meta-analysis of the evidence.  
12  
13 *Journal of the American College of Nutrition* 2004;**23**(1):5-17  
14
- 15  
16 10. Shai I, Schwarzfuchs D, Henkin Y, et al. Weight loss with a low-carbohydrate,  
17 Mediterranean, or low-fat diet. *N Engl J Med* 2008;**359**(3):229-41  
18
- 19  
20 11. Sacks FM, Ornish D, Rosner B, et al. Plasma lipoprotein levels in vegetarians. The effect of  
21 ingestion of fats from dairy products. *JAMA* 1985;**254**(10):1337-41  
22  
23
- 24  
25 12. Ornish D, Brown SE, Scherwitz LW, et al. Can lifestyle changes reverse coronary heart  
26 disease? The Lifestyle Heart Trial. *Lancet* 1990;**336**(8708):129-33  
27  
28
- 29  
30 13. Barnard ND, Cohen J, Jenkins DJ, et al. A low-fat vegan diet improves glycemic control and  
31 cardiovascular risk factors in a randomized clinical trial in individuals with type 2  
32  
33 diabetes. *Diabetes care* 2006;**29**(8):1777-83  
34  
35
- 36  
37 14. Jenkins DJ, Newton C, Leeds AR, et al. Effect of pectin, guar gum, and wheat fibre on  
38 serum-cholesterol. *Lancet* 1975;**1**(7916):1116-7  
39  
40
- 41  
42 15. Sirtori CR, Agradi E, Conti F, et al. Soybean-protein diet in the treatment of type-II  
43 hyperlipoproteinaemia. *Lancet* 1977;**1**(8006):275-7  
44  
45
- 46  
47 16. Grundy SM. Comparison of monounsaturated fatty acids and carbohydrates for lowering  
48 plasma cholesterol. *N Engl J Med* 1986;**314**(12):745-8  
49  
50
- 51  
52 17. Anderson JW, Johnstone BM, Cook-Newell ME. Meta-analysis of the effects of soy protein  
53 intake on serum lipids. *N Engl J Med* 1995;**333**(5):276-82  
54  
55  
56  
57  
58  
59  
60

- 1  
2  
3  
4  
5  
6  
7  
8  
9  
10  
11  
12  
13  
14  
15  
16  
17  
18  
19  
20  
21  
22  
23  
24  
25  
26  
27  
28  
29  
30  
31  
32  
33  
34  
35  
36  
37  
38  
39  
40  
41  
42  
43  
44  
45  
46  
47  
48  
49  
50  
51  
52  
53  
54  
55  
56  
57  
58  
59  
60
18. Kris-Etherton PM, Yu-Poth S, Sabate J, et al. Nuts and their bioactive constituents: effects on serum lipids and other factors that affect disease risk. *Am J Clin Nutr* 1999;**70**(3 Suppl):504S-11S
19. Sabate J, Oda K, Ros E. Nut consumption and blood lipid levels: a pooled analysis of 25 intervention trials. *Arch Intern Med* 2010;**170**(9):821-7 doi: 10.1001/archinternmed.2010.79[published Online First: Epub Date].
20. Ros E, Nunez I, Perez-Heras A, et al. A walnut diet improves endothelial function in hypercholesterolemic subjects: a randomized crossover trial. *Circulation* 2004;**109**(13):1609-14 doi: 10.1161/01.CIR.0000124477.91474.FF[published Online First: Epub Date].
21. Zhao G, Etherton TD, Martin KR, et al. Dietary alpha-linolenic acid reduces inflammatory and lipid cardiovascular risk factors in hypercholesterolemic men and women. *J Nutr* 2004;**134**(11):2991-7
22. West SG, Krick AL, Klein LC, et al. Effects of diets high in walnuts and flax oil on hemodynamic responses to stress and vascular endothelial function. *Journal of the American College of Nutrition* 2010;**29**(6):595-603
23. Sahoo PK, Behera P. Synthesis and biological screening of some novel amidocarbamate derivatives of ketoprofen.[Retraction in *Eur J Med Chem.* 2012 Jan;**47**(1):626; PMID: 22355807]. *European Journal of Medicinal Chemistry* 2010;**45**(7):3162-8
24. Appleby PN, Thorogood M, Mann JI, et al. The Oxford Vegetarian Study: an overview. *Am J Clin Nutr* 1999;**70**(3 Suppl):525S-31S
25. Fraser GE. *Diet, life expectancy, and chronic disease: studies of Seventh-Day Adventists and other vegetarians*. New York: Oxford University Press, 2003.

- 1  
2  
3  
4  
5  
6  
7  
8  
9  
10  
11  
12  
13  
14  
15  
16  
17  
18  
19  
20  
21  
22  
23  
24  
25  
26  
27  
28  
29  
30  
31  
32  
33  
34  
35  
36  
37  
38  
39  
40  
41  
42  
43  
44  
45  
46  
47  
48  
49  
50  
51  
52  
53  
54  
55  
56  
57  
58  
59  
60
26. Pereira MA, O'Reilly E, Augustsson K, et al. Dietary fiber and risk of coronary heart disease: a pooled analysis of cohort studies. *Arch Intern Med* 2004;**164**(4):370-6
27. Li TY, Brennan AM, Wedick NM, et al. Regular consumption of nuts is associated with a lower risk of cardiovascular disease in women with type 2 diabetes. *J Nutr* 2009;**139**(7):1333-8 doi: 10.3945/jn.108.103622[published Online First: Epub Date]].
28. Kris-Etherton PM, Hu FB, Ros E, et al. The role of tree nuts and peanuts in the prevention of coronary heart disease: multiple potential mechanisms. *J Nutr* 2008;**138**(9):1746S-51S
29. Pan A, Sun Q, Manson JE, et al. Walnut consumption is associated with lower risk of type 2 diabetes in women. *J Nutr* 2013;**143**(4):512-8 doi: 10.3945/jn.112.172171[published Online First: Epub Date]].
30. Halton TL, Willett WC, Liu S, et al. Low-carbohydrate-diet score and the risk of coronary heart disease in women. *N Engl J Med* 2006;**355**(19):1991-2002
31. Halton TL, Liu S, Manson JE, et al. Low-carbohydrate-diet score and risk of type 2 diabetes in women. *Am J Clin Nutr* 2008;**87**(2):339-46 doi: 87/2/339 [pii][published Online First: Epub Date]].
32. Pan A, Sun Q, Bernstein AM, et al. Red meat consumption and mortality: results from 2 prospective cohort studies. *Archives of internal medicine* 2012;**172**(7):555-63 doi: 10.1001/archinternmed.2011.2287[published Online First: Epub Date]].
33. Estruch R, Ros E, Salas-Salvado J, et al. Primary prevention of cardiovascular disease with a Mediterranean diet. *N Engl J Med* 2013;**368**(14):1279-90 doi: 10.1056/NEJMoa1200303[published Online First: Epub Date]].
34. Sacks FM, Kass EH. Low blood pressure in vegetarians: effects of specific foods and nutrients. *Am J Clin Nutr* 1988;**48**(3 Suppl):795-800

- 1  
2  
3 35. Jenkins DJ, Kendall CW, Marchie A, et al. Effects of a dietary portfolio of cholesterol-  
4 lowering foods vs lovastatin on serum lipids and C-reactive protein. JAMA  
5  
6  
7  
8 2003;**290**(4):502-10  
9
- 10 36. Appel LJ, Sacks FM, Carey VJ, et al. Effects of protein, monounsaturated fat, and  
11  
12 carbohydrate intake on blood pressure and serum lipids: results of the OmniHeart  
13  
14 randomized trial. JAMA 2005;**294**(19):2455-64  
15  
16
- 17 37. Gardner CD, Coulston A, Chatterjee L, et al. The effect of a plant-based diet on plasma lipids  
18  
19 in hypercholesterolemic adults: a randomized trial. Ann Intern Med 2005;**142**(9):725-33  
20  
21
- 22 38. Harris JA, Benedict FG. *A biometric study of basal metabolism in man*. Washington, DC:  
23  
24 Carnegie Institute of Washington, 1919 (Publication no. 279.).  
25  
26
- 27 39. Shetty PS, Henry CJ, Black AE, et al. Energy requirements of adults: an update on basal  
28  
29 metabolic rates (BMRs) and physical activity levels (PALs). Eur J Clin Nutr 1996;**50**  
30  
31 **Suppl 1**:S11-23  
32  
33
- 34 40. Pereira MA, Swain J, Goldfine AB, et al. Effects of a low-glycemic load diet on resting  
35  
36 energy expenditure and heart disease risk factors during weight loss. JAMA  
37  
38 2004;**292**(20):2482-90  
39  
40
- 41 41. Ainsworth BE, Haskell WL, Leon AS, et al. Compendium of physical activities:  
42  
43 classification of energy costs of human physical activities. Med Sci Sports Exerc  
44  
45 1993;**25**(1):71-80  
46  
47
- 48 42. Anderson KM, Wilson PW, Odell PM, et al. An updated coronary risk profile. A statement  
49  
50 for health professionals. Circulation 1991;**83**(1):356-62  
51  
52
- 53 43. USDA Nutrient Database for Standard Reference, Release 19. Nutrient Data Laboratory  
54  
55 Home Page: U.S. Department of Agriculture, Agricultural Research Service, 2006.  
56  
57  
58  
59  
60

- 1  
2  
3 44. SAS Institute. SAS/STAT User's Guide (ed 9.2) [program]. Cary, NC: SAS Institute, 2008.
- 4  
5  
6 45. Executive Summary of The Third Report of The National Cholesterol Education Program  
7  
8 (NCEP) Expert Panel on Detection, Evaluation, And Treatment of High Blood  
9  
10 Cholesterol In Adults (Adult Treatment Panel III). JAMA 2001;**285**(19):2486-97
- 11  
12  
13 46. Grundy SM, Cleeman JI, Merz CN, et al. Implications of recent clinical trials for the  
14  
15 National Cholesterol Education Program Adult Treatment Panel III guidelines.  
16  
17 Circulation 2004;**110**(2):227-39
- 18  
19  
20 47. Westman EC, Yancy WS, Edman JS, et al. Effect of 6-month adherence to a very low  
21  
22 carbohydrate diet program. Am J Med 2002;**113**(1):30-6
- 23  
24  
25 48. Jenkins DJ, Jones PJ, Lamarche B, et al. Effect of a dietary portfolio of cholesterol-lowering  
26  
27 foods given at 2 levels of intensity of dietary advice on serum lipids in hyperlipidemia: a  
28  
29 randomized controlled trial. JAMA 2011;**306**(8):831-9 doi:  
30  
31 10.1001/jama.2011.1202[published Online First: Epub Date].
- 32  
33  
34 49. Gotto AM, Jr., Whitney E, Stein EA, et al. Relation between baseline and on-treatment lipid  
35  
36 parameters and first acute major coronary events in the Air Force/Texas Coronary  
37  
38 Atherosclerosis Prevention Study (AFCAPS/TexCAPS). Circulation 2000;**101**(5):477-84
- 39  
40  
41 50. Sniderman AD, Furberg CD, Keech A, et al. Apolipoproteins versus lipids as indices of  
42  
43 coronary risk and as targets for statin treatment. Lancet 2003;**361**(9359):777-80
- 44  
45  
46 51. Yusuf S, Hawken S, Ounpuu S, et al. Effect of potentially modifiable risk factors associated  
47  
48 with myocardial infarction in 52 countries (the INTERHEART study): case-control  
49  
50 study. Lancet 2004;**364**(9438):937-52
- 51  
52  
53  
54  
55  
56  
57  
58  
59  
60

- 1  
2  
3  
4  
5  
6  
7  
8  
9  
10  
11  
12  
13  
14  
15  
16  
17  
18  
19  
20  
21  
22  
23  
24  
25  
26  
27  
28  
29  
30  
31  
32  
33  
34  
35  
36  
37  
38  
39  
40  
41  
42  
43  
44  
45  
46  
47  
48  
49  
50  
51  
52  
53  
54  
55  
56  
57  
58  
59  
60
52. McQueen MJ, Hawken S, Wang X, et al. Lipids, lipoproteins, and apolipoproteins as risk factors of myocardial infarction in 52 countries (the INTERHEART study): a case-control study. *Lancet* 2008;**372**:224-33
53. Contois JH, McConnell JP, Sethi AA, et al. Apolipoprotein B and cardiovascular disease risk: position statement from the AACC Lipoproteins and Vascular Diseases Division Working Group on Best Practices. *Clin Chem* 2009;**55**(3):407-19 doi: 10.1373/clinchem.2008.118356[published Online First: Epub Date]].
54. Sniderman AD, Williams K, Contois JH, et al. A meta-analysis of low-density lipoprotein cholesterol, non-high-density lipoprotein cholesterol, and apolipoprotein B as markers of cardiovascular risk. *Circ Cardiovasc Qual Outcomes* 2011;**4**(3):337-45 doi: 10.1161/CIRCOUTCOMES.110.959247[published Online First: Epub Date]].
55. Liu S, Manson JE, Buring JE, et al. Relation between a diet with a high glycemic load and plasma concentrations of high-sensitivity C-reactive protein in middle-aged women. *Am J Clin Nutr* 2002;**75**(3):492-8
56. Wolever TM, Gibbs AL, Mehling C, et al. The Canadian Trial of Carbohydrates in Diabetes (CCD), a 1-y controlled trial of low-glycemic-index dietary carbohydrate in type 2 diabetes: no effect on glycated hemoglobin but reduction in C-reactive protein. *Am J Clin Nutr* 2008;**87**(1):114-25
57. Sabate J, Fraser GE, Burke K, et al. Effects of walnuts on serum lipid levels and blood pressure in normal men. *N Engl J Med* 1993;**328**(9):603-7
58. Jenkins DJ, Kendall CW, Marchie A, et al. Dose response of almonds on coronary heart disease risk factors: blood lipids, oxidized low-density lipoproteins, lipoprotein(a),

1  
2  
3 homocysteine, and pulmonary nitric oxide: a randomized, controlled, crossover trial.  
4  
5 Circulation 2002;**106**(11):1327-32  
6  
7

- 8 59. Mozaffarian D, Hao T, Rimm EB, et al. Changes in diet and lifestyle and long-term weight  
9 gain in women and men. The New England journal of medicine 2011;**364**(25):2392-404  
10 doi: 10.1056/NEJMoa1014296[published Online First: Epub Date]].  
11  
12  
13  
14  
15  
16  
17  
18  
19  
20  
21  
22  
23  
24  
25  
26  
27  
28  
29  
30  
31  
32  
33  
34  
35  
36  
37  
38  
39  
40  
41  
42  
43  
44  
45  
46  
47  
48  
49  
50  
51  
52  
53  
54  
55  
56  
57  
58  
59  
60

For peer review only



1  
2  
3 **Figure Legends**  
4  
5  
6  
7

8 Figure 1: Patient Flow Diagram.  
9

10  
11  
12 Figure 2: Weight loss during the study on both diets.  
13  
14

15  
16  
17 Figure 3: Mean (A) LDL-C, (B) HDL-C, (C) TC:HDL-C, (D) apolipoprotein B (apoB) and (E)  
18 apolipoprotein A1 (apoA1), (F) ApoB:ApoA1 ratio between the two treatments during the  
19 metabolic and ad libitum phases.  
20  
21  
22  
23  
24  
25  
26  
27  
28  
29  
30  
31  
32  
33  
34  
35  
36  
37  
38  
39  
40  
41  
42  
43  
44  
45  
46  
47  
48  
49  
50  
51  
52  
53  
54  
55  
56  
57  
58  
59  
60

**Table 1: Baseline Characteristics for Those Who Started the 6-Month Self-Selected Diets (n=39)**

|                                          | High-carbohydrate (n=19) | Low-Carbohydrate (n=20) |
|------------------------------------------|--------------------------|-------------------------|
| Age (y)                                  | 55.3 ± 1.8               | 57.6 ± 1.4              |
| Males/Females                            | 6/13                     | 9/11                    |
| Body Weight, kg                          | 85.4 [79.3, 91.6]        | 83.7 [78.5, 89.0]       |
| Body Mass Index, kg/m <sup>2</sup>       | 31.1 [29.9, 32.4]        | 31.1 [29.8, 32.4]       |
| Blood Pressure, mm Hg                    |                          |                         |
| Systolic                                 | 122 [116, 128]           | 128 [123, 132]          |
| Diastolic                                | 75 [72, 79]              | 77 [74, 80]             |
| Cholesterol, mmol/L                      |                          |                         |
| Total                                    | 6.75 [6.28, 7.21]        | 6.76 [6.21, 7.31]       |
| LDL-C                                    | 4.40 [3.99, 4.82]        | 4.53 [4.14, 4.93]       |
| HDL-C                                    | 1.36 [1.22, 1.50]        | 1.21 [1.06, 1.36]       |
| Triglycerides, mmol/L                    | 2.16 [1.62, 2.70]        | 2.23 [1.65, 2.80]       |
| Ratios                                   |                          |                         |
| TC:HDL-C                                 | 5.17 [4.54, 5.80]        | 5.81 [5.20, 6.41]       |
| LDL-C: HDL-C                             | 3.35 [2.95, 3.75]        | 3.89 [3.49, 4.29]       |
| Medications                              |                          |                         |
| Lipid lowering (prior to start of study) | 4                        | 7                       |
| Blood pressure                           | 3                        | 6                       |
| Diabetes                                 | 0                        | 0                       |
| Thyroid                                  | 2                        | 1                       |

Values represent mean ± SEM or 95% confidence intervals (CIs).

No significant differences between treatments at baseline assessed by two sample t-test (two-tailed).

**Table 2: Nutritional Profiles on the High and Low Carbohydrate Diets (n=39)**

|                                                                                                                                                                                                                                                                                                                                           | High Carbohydrate   |                         | Low Carbohydrate    |                         | Between-Treatment Difference <sup>c</sup> | P-value <sup>d</sup> |
|-------------------------------------------------------------------------------------------------------------------------------------------------------------------------------------------------------------------------------------------------------------------------------------------------------------------------------------------|---------------------|-------------------------|---------------------|-------------------------|-------------------------------------------|----------------------|
|                                                                                                                                                                                                                                                                                                                                           | Week 0 <sup>b</sup> | Ad Libitum <sup>b</sup> | Week 0 <sup>b</sup> | Ad Libitum <sup>b</sup> |                                           |                      |
| Calories (kcal)                                                                                                                                                                                                                                                                                                                           | 1598 [1421, 1775]   | 1347 [1140, 1553]       | 1840 [1550, 2130]   | 1388 [1234, 1541]       | -248 [-391, -106]                         | 0.001                |
| % of Total Calories                                                                                                                                                                                                                                                                                                                       |                     |                         |                     |                         |                                           |                      |
| Available Carbohydrate                                                                                                                                                                                                                                                                                                                    | 46.3 [42.2, 50.4]   | 53.9 [50.2, 57.5]       | 43.8 [40.2, 47.4]   | 39.6 [35.7, 43.6]       | -10.5 [-13.6, -7.5]                       | < 0.001              |
| Protein                                                                                                                                                                                                                                                                                                                                   | 20.6 [18.7, 22.5]   | 18.4 [17.4, 19.5]       | 20.1 [18.0, 22.2]   | 22.7 [20.1, 25.4]       | 5.9 [4.3, 7.5]                            | < 0.001              |
| Vegetable Protein                                                                                                                                                                                                                                                                                                                         | 5.6 [5.0, 6.1]      | 6.7 [6.1, 7.3]          | 5.7 [5.3, 6.1]      | 15.0 [11.7, 18.2]       | 8.2 [6.5, 9.9]                            | < 0.001              |
| Soy Protein                                                                                                                                                                                                                                                                                                                               | 0 [0, 0]            | 0.2 [0.1, 0.2]          | 0 [0, 0]            | 4.7 [2.7, 6.8]          | 3.6 [2.9, 4.4]                            | < 0.001              |
| Fat                                                                                                                                                                                                                                                                                                                                       | 30.8 [27.3, 34.4]   | 27.5 [24.6, 30.4]       | 34.4 [31.4, 37.5]   | 36.0 [31.5, 40.5]       | 5.2 [2.6, 7.7]                            | < 0.001              |
| Saturated                                                                                                                                                                                                                                                                                                                                 | 10.8 [9.1, 12.6]    | 7.6 [6.2, 8.9]          | 11.8 [10.3, 13.3]   | 7.5 [6.6, 8.4]          | -0.4 [-1.4, 0.6]                          | 0.401                |
| Monounsaturated                                                                                                                                                                                                                                                                                                                           | 12.3 [10.7, 13.8]   | 10.4 [9.3, 11.6]        | 13.0 [11.9, 14.2]   | 14.8 [13.1, 16.6]       | 4.6 [3.1, 6.1]                            | < 0.001              |
| Polyunsaturated*                                                                                                                                                                                                                                                                                                                          | 5.2 [4.6, 5.8]      | 6.3 [5.4, 7.2]          | 6.6 [5.5, 7.8]      | 8.4 [7.5, 9.4]          | 0.4 [-0.5, 1.4]                           | 0.4                  |
| Alcohol                                                                                                                                                                                                                                                                                                                                   | 2.2 [0.3, 4.2]      | 1.9 [0.7, 3.2]          | 1.6 [0.0, 3.3]      | 1.1 [0.1, 2.1]          | -0.5 [-1.3, 0.2]                          | 0.160                |
| Dietary Fibre (g/1000 kcal)                                                                                                                                                                                                                                                                                                               | 10.9 [9.2, 12.5]    | 18.2 [15.2, 21.1]       | 12.1 [9.9, 14.4]    | 21.3 [18.8, 23.8]       | 1.5 [-0.5, 3.5]                           | 0.127                |
| Dietary Cholesterol (mg/1000 kcal)                                                                                                                                                                                                                                                                                                        | 149 [129, 169]      | 87 [61, 113]            | 157 [136, 177]      | 117 [44, 189]           | 11 [-22, 23]                              | 0.954                |
| Adherence with "Eco-Atkins" Components <sup>a</sup>                                                                                                                                                                                                                                                                                       |                     |                         |                     |                         |                                           |                      |
| Viscous Fiber (out of 33.3%)                                                                                                                                                                                                                                                                                                              | ---                 | ---                     | ---                 | 14.0 [9.4, 18.6]        | ---                                       | ---                  |
| Vegetable Protein (soy and gluten) (out of 33.3%)                                                                                                                                                                                                                                                                                         | ---                 | ---                     | ---                 | 14.7 [10.3, 19.1]       | ---                                       | ---                  |
| Nuts (out of 33.3%)                                                                                                                                                                                                                                                                                                                       | ---                 | ---                     | ---                 | 6.3 [3.3, 9.3]          | ---                                       | ---                  |
| Total Adherence (out of 100%)                                                                                                                                                                                                                                                                                                             | ---                 | ---                     | ---                 | 33.6 [22.1, 45.2]       | ---                                       | ---                  |
| Values represent mean ± 95% confidence intervals (CIs).                                                                                                                                                                                                                                                                                   |                     |                         |                     |                         |                                           |                      |
| <sup>a</sup> Adherence represents the mean percentage intake of the prescribed intake of the 3 cholesterol-lowering components [viscous fiber, vegetable protein (soy and gluten), nuts] by expressing the recorded intake for each component as 33.3%. The sum of the 3 components if consumed as prescribed would equal 100% adherence. |                     |                         |                     |                         |                                           |                      |
| <sup>b</sup> Values represent multiple imputation (taking the mean of 5 sets of randomly imputed values) to generate data for those who dropped out or had missing values.                                                                                                                                                                |                     |                         |                     |                         |                                           |                      |
| <sup>c</sup> Between Treatment Difference = Change from baseline between the two diets using all available data.                                                                                                                                                                                                                          |                     |                         |                     |                         |                                           |                      |
| <sup>d</sup> P-values assessed using all available data and a repeated measures mixed model accounting for time of assessment. The response variable was change from baseline, with diet and week as fixed effects and subject ID nested in diet. There was no adjustment for baseline.                                                   |                     |                         |                     |                         |                                           |                      |
| *Significantly different between treatments at baseline assessed by two sample t-test (two tailed), P=0.025.                                                                                                                                                                                                                              |                     |                         |                     |                         |                                           |                      |

**Table 3: Effect of high and low carbohydrate diets on body weight, blood lipids, apolipoproteins and 10-yr CHD risk (n=39)**

|                                   | High Carbohydrate   |                         | Low Carbohydrate    |                         | Between Treatment Difference <sup>b</sup> | P-value <sup>c</sup> |
|-----------------------------------|---------------------|-------------------------|---------------------|-------------------------|-------------------------------------------|----------------------|
|                                   | Week 0 <sup>a</sup> | Ad Libitum <sup>a</sup> | Week 0 <sup>a</sup> | Ad Libitum <sup>a</sup> |                                           |                      |
| Body Weight, kg                   | 85.4 [79.3, 91.6]   | 80.4 [74.2, 86.6]       | 83.7 [78.5, 89.0]   | 76.9 [71.9, 81.9]       | -1.1 [-2.1, 0.0]                          | 0.047                |
| BMI                               | 31.1 [29.9, 32.4]   | 29.2 [27.9, 30.5]       | 31.1 [29.8, 32.4]   | 28.7 [27.3, 30.1]       | -0.4 [-0.8, 0.0]                          | 0.039                |
| Body Fat, %                       | 38.9 [34.0, 43.8]   | 35.0 [30.7, 39.2]       | 35.6 [30.1, 41.1]   | 31.4 [26.1, 36.6]       | -1.7 [-4.0, 0.7]                          | 0.161                |
| Waist Circumference (cm)          | 102.8 [99.4, 106.2] | 97.4 [93.1, 101.6]      | 99.8 [96.1, 103.5]  | 93.7 [89.8, 97.7]       | 0.1 [-1.1, 1.3]                           | 0.861                |
| Fasting Glucose                   | 5.2 [4.9, 5.4]      | 4.6 [4.5, 4.7]          | 5.2 [5.0, 5.4]      | 4.6 [4.4, 4.9]          | 0.1 [-0.1, 0.2]                           | 0.447                |
| HbA1c (%)                         | 5.2 [5.0, 5.4]      | 5.2 [5.0, 5.3]          | 5.3 [5.0, 5.5]      | 5.2 [5.0, 5.4]          | 0.0 [-0.2, 0.1]                           | 0.852                |
| Fasting Insulin                   | 50.0 [38.3, 61.7]   | 36.4 [27.5, 45.4]       | 47.3 [36.9, 57.6]   | 33.3 [22.8, 43.9]       | -0.6 [-9.1, 8.0]                          | 0.898                |
| HOMA-IR                           | 1.65 [1.17, 2.13]   | 1.11 [0.81, 1.41]       | 1.53 [1.19, 1.88]   | 0.99 [0.68, 1.30]       | 0.01 [-0.30, 0.33]                        | 0.937                |
| Satiety (-4 to 4)                 | 1.0 [0.7, 1.4]      | 0.9 [0.7, 1.2]          | 1.2 [0.8, 1.7]      | 1.1 [0.8, 1.4]          | -0.1 [-0.4, 0.2]                          | 0.440                |
| Exercise, METs                    | 17.4 [12.4, 22.4]   | 25.8 [21.1, 30.6]       | 24.0 [12.9, 35.0]   | 23.9 [15.3, 32.6]       | -9.3 [-16.4, -2.2]                        | 0.012                |
| Cholesterol, mmol/L <sup>†</sup>  |                     |                         |                     |                         |                                           |                      |
| Total                             | 6.75 [6.28, 7.21]   | 6.49 [5.97, 7.02]       | 6.76 [6.21, 7.31]   | 6.10 [5.67, 6.53]       | -0.62 [-0.86, -0.37]                      | <0.001               |
| LDL-C                             | 4.40 [3.99, 4.82]   | 4.40 [3.91, 4.90]       | 4.53 [4.14, 4.93]   | 4.06 [3.71, 4.42]       | -0.49 [-0.70, -0.28]                      | <0.001               |
| HDL-C                             | 1.36 [1.22, 1.50]   | 1.35 [1.22, 1.48]       | 1.21 [1.06, 1.36]   | 1.25 [1.10, 1.39]       | 0.03 [-0.02, 0.07]                        | 0.245                |
| Triglycerides                     | 2.16 [1.62, 2.70]   | 1.71 [1.35, 2.07]       | 2.23 [1.65, 2.80]   | 1.50 [1.22, 1.77]       | -0.34 [-0.57, -0.11]                      | 0.005                |
| Ratios                            |                     |                         |                     |                         |                                           |                      |
| Tchol:HDL-C                       | 5.17 [4.54, 5.80]   | 4.92 [4.49, 5.34]       | 5.81 [5.20, 6.41]   | 5.13 [4.65, 5.62]       | -0.57 [-0.83, -0.32]                      | <0.001               |
| LDL-C:HDL-C                       | 3.35 [2.95, 3.75]   | 3.34 [3.00, 3.68]       | 3.89 [3.49, 4.29]   | 3.48 [3.06, 3.90]       | -0.42 [-0.60, -0.24]                      | <0.002               |
| Apolipoproteins, g/L <sup>‡</sup> |                     |                         |                     |                         |                                           |                      |
| Apo A1                            | 1.69 [1.60, 1.78]   | 1.69 [1.60, 1.77]       | 1.57 [1.45, 1.69]   | 1.57 [1.46, 1.67]       | -0.02 [-0.06, 0.02]                       | 0.316                |
| Apo B                             | 1.38 [1.26, 1.50]   | 1.23 [1.13, 1.33]       | 1.42 [1.30, 1.54]   | 1.20 [1.10, 1.31]       | -0.11 [-0.16, -0.06]                      | <0.001               |
| Apo B: Apo A1                     | 0.83 [0.74, 0.91]   | 0.74 [0.68, 0.80]       | 0.92 [0.84, 0.99]   | 0.78 [0.70, 0.86]       | -0.05 [-0.09, -0.02]                      | 0.003                |
| hs-CRP, mg/dL                     | 2.1 [1.0, 3.3]      | 1.9 [1.3, 2.4]          | 3.0 [1.5, 4.5]      | 2.6 [1.0, 4.1]          | -0.4 [-0.9, 0.1]                          | 0.082                |
| Blood Pressure, mmHg              |                     |                         |                     |                         |                                           |                      |
| Systolic                          | 122 [116, 128]      | 118 [114, 122]          | 128 [123, 132]      | 123 [119, 128]          | -2 [-5, 2]                                | 0.356                |
| Diastolic                         | 75 [72, 79]         | 74 [71, 77]             | 77 [74, 80]         | 76 [71, 80]             | -1 [-3, 1]                                | 0.288                |
| 10-yr CHD risk (%)*               | 8 [6, 9]            | 7 [6, 9]                | 12 [9, 14]          | 9 [7, 11]               | -2 [-2, -1]                               | <0.001               |

1  
2  
3  
4  
5  
6  
7  
8  
9  
10  
11  
12  
13  
14  
15  
16  
17  
18  
19  
20  
21  
22  
23  
24  
25  
26  
27  
28  
29  
30  
31  
32  
33  
34  
35  
36  
37  
38  
39  
40  
41  
42  
43  
44  
45  
46  
47  
48  
49

|                                                                                                                                                                                                                                                                                         |  |  |  |  |  |
|-----------------------------------------------------------------------------------------------------------------------------------------------------------------------------------------------------------------------------------------------------------------------------------------|--|--|--|--|--|
| Values represent mean ± 95% confidence intervals (CIs).                                                                                                                                                                                                                                 |  |  |  |  |  |
| <sup>†</sup> To convert total cholesterol, LDL-C, and HDL-C to mg/dL, divide by 0.0259; to convert triglycerides to mg/dL, divide by 0.0113.                                                                                                                                            |  |  |  |  |  |
| <sup>‡</sup> To convert apolipoprotein A1 and B to mg/dL, multiply by 100.                                                                                                                                                                                                              |  |  |  |  |  |
|                                                                                                                                                                                                                                                                                         |  |  |  |  |  |
| <sup>a</sup> Values represent multiple imputation (taking the mean of 5 sets of randomly imputed values) to generate data for those who dropped out or had missing values.                                                                                                              |  |  |  |  |  |
| <sup>b</sup> Between Treatment Difference = Change from baseline between the two diets using all available data.                                                                                                                                                                        |  |  |  |  |  |
| <sup>c</sup> P-values assessed using all available data and a repeated measures mixed model accounting for time of assessment. The response variable was change from baseline, with diet and week as fixed effects and subject ID nested in diet. There was no adjustment for baseline. |  |  |  |  |  |
| <sup>*</sup> Significantly different between treatments at baseline assessed by two sample t-test (two tailed), P=0.007.                                                                                                                                                                |  |  |  |  |  |

peer review only

1  
2  
3  
4  
5  
6  
7  
8  
9  
10  
11  
12  
13  
14

# Six Months of a Vegan Low-Carbohydrate (“Eco-Atkins”) Diet Improves Cardiovascular Risk Factors and Body Weight in Hyperlipidemic Adults: A Randomized Controlled Trial

15 David JA Jenkins, MD<sup>1-5</sup> Julia MW Wong, PhD<sup>1,3</sup> Cyril WC Kendall, PhD<sup>1,3</sup> Amin Esfahani,  
16 MSc<sup>1,3</sup> Vivian WY Ng, RD<sup>1,3</sup> Tracy CK Leong, BSc<sup>1,3</sup> Dorothea A Faulkner, PhD<sup>1,3</sup> Ed  
17 Vidgen, BSc<sup>1,3</sup> Gregory Paul, PhD<sup>6</sup> Ratna Mukherjea, PhD<sup>6</sup> Elaine S. Krul, PhD<sup>6</sup> William  
18 Singer, MD<sup>1-4</sup>  
19  
20  
21  
22  
23  
24  
25  
26

27 Departments of <sup>1</sup>Nutritional Sciences, <sup>2</sup>Medicine, Faculty of Medicine, University of Toronto,  
28 Toronto, Ontario, Canada; <sup>3</sup>Clinical Nutrition & Risk Factor Modification Center, St. Michael’s  
29 Hospital, Toronto, Ontario, Canada; <sup>4</sup>Department of Medicine, Division of Endocrinology and  
30 Metabolism, <sup>5</sup>Li Ka Shing Knowledge Institute, St. Michael’s Hospital, Toronto, Ontario,  
31 Canada; <sup>6</sup>Solae LLC, St. Louis, Missouri, USA  
32  
33  
34  
35  
36  
37  
38

39 JMWW current affiliation is the New Balance Foundation Obesity Prevention Center, Boston Children’s  
40 Hospital, Boston, MA, USA, and Department of Pediatrics, Harvard Medical School, Boston, MA, USA.  
41  
42

43 AE current affiliation is New York Medical College, School of Medicine, Valhalla, NY, USA.  
44

45 Address correspondence and reprint requests to David JA Jenkins, Clinical Nutrition and Risk  
46 Factor Modification Center, St. Michael’s Hospital, 61 Queen St. East, Toronto, Ontario,  
47  
48 CANADA, M5C 2T2. Phone: (416) 978-4752; Fax: (416) 978-5310; EM:  
49  
50  
51

52 [cyril.kendall@utoronto.ca](mailto:cyril.kendall@utoronto.ca)  
53  
54

55  
56 | Manuscript Word Count: 3,891+88  
57  
58  
59  
60

1  
2  
3 **Number of Tables:** 3

4  
5  
6 **Number of Figures:** 3

7  
8 **Number of References:** 59

9  
10 **Running Title:** Weight loss in hyperlipidemia on a vegan diet

11  
12 **Trial Registration:** #NCT00256516

13  
14  
15 **Keywords:** weight loss, vegetable proteins, nuts, soy, vegan diet, hyperlipidemia

16  
17  
18  
19  
20 **Contributions**

21  
22 *Conception and design* - Jenkins, Wong, Kendall, Faulkner, Paul, Mukherjea, Krul, Singer

23  
24 *Acquisition of data* - Jenkins, Wong, Kendall, Esfahani, Ng, Leong

25  
26 *Analysis and interpretation of data* – Jenkins, Wong, Kendall, Vidgen

27  
28 *Drafting of the manuscript* – Jenkins, Wong

29  
30 *Critical revision of the manuscript for important intellectual content* – Jenkins, Wong, Kendall,

31  
32 Esfahani, Ng, Leong, Faulkner, Vidgen, Paul, Mukherjea, Krul, Singer

33  
34 *Statistical analysis* - Vidgen

35  
36 *Obtaining funding* – Jenkins, Kendall, Wong

37  
38 *Administrative, technical, or material support* – Wong, Kendall, Esfahani, Ng, Leong, Faulkner

39  
40 *Supervision* – Jenkins, Kendall, Wong, Singer

41  
42 *No additional contributions* - Paul, Mukherjea, Krul

## Abstract

**Objective:** Low-carbohydrate diets may be useful for weight loss. Diets high in vegetable proteins and oils may reduce the risk of coronary heart disease (CHD). The main objective was to determine the longer term effect of a diet that was both low-carbohydrate and plant-based on weight loss and LDL-C.

**Design, Setting, Participants:** A parallel design study of 39 overweight hyperlipidemic men and postmenopausal women conducted at a Canadian university-affiliated hospital nutrition research center from April 2005 to November 2006.

**Intervention:** Participants were advised to consume either a low-carbohydrate vegan diet or a high-carbohydrate lacto-ovo vegetarian diet for six-months after completing one-month metabolic (all foods provided) versions of these diets. The prescribed macronutrient intakes for the low- and high-carbohydrate diets were: 26% and 58% of energy from carbohydrate, 31% and 16% from protein and 43% and 25% from fat, respectively.

**Primary Outcome:** Change in body weight.

**Results:** Twenty-three participants (50% test, 68% control) completed the six-month ad libitum study. The approximate 4kg weight loss on the metabolic study was increased to -6.9kg on low-carbohydrate and -5.8kg on high-carbohydrate six-month ad libitum treatments (treatment difference [95% CI]: -1.1kg [-2.1, 0.0],  $P=0.047$ ). The relative LDL-C and triglyceride reductions were also greater on the low-carbohydrate treatment (treatment difference [95% CI]: -0.49mmol/L [-0.70, -0.28],  $P<0.001$  and -0.34mmol/L [-0.57, -0.11],  $P=0.005$ , respectively), as were the TC:HDL-C and apolipoprotein B:A1 ratios (-0.57 [-0.83, -0.32],  $P<0.001$  and -0.05 [-0.09, -0.02],  $P=0.003$ , respectively).



1  
2  
3 **Conclusions:** A self-selected low-carbohydrate vegan diet, containing increased protein and fat  
4  
5 from gluten and soy products, nuts, and vegetable oils, had lipid lowering advantages over a  
6  
7 high-carbohydrate, low-fat weight loss diet, thus improving heart disease risk factors.  
8  
9

10  
11  
12 **Trial Registration:** clinicaltrials.gov (<http://www.clinicaltrials.gov/>), #NCT00256516  
13  
14

15  
16  
17 **Abstract Word Count:** 273 (up to 300 allowed)  
18  
19  
20  
21  
22  
23  
24  
25  
26  
27  
28  
29  
30  
31  
32  
33  
34  
35  
36  
37  
38  
39  
40  
41  
42  
43  
44  
45  
46  
47  
48  
49  
50  
51  
52  
53  
54  
55  
56  
57  
58  
59  
60

## Article Summary

### Article Focus

- Low-carbohydrate diets may be useful for weight loss. Diets high in vegetable proteins and oils may reduce the risk of coronary heart disease (CHD).
- The objective of the randomized clinical trial was to determine the longer term effect of a diet that was both low-carbohydrate and plant-based on weight loss and LDL-C.
- We have already reported the effect of this dietary strategy in producing a difference of 8% in LDL-C reduction between calorie-restricted diets (60% of estimated calorie requirements) when all food was provided. We now report findings after these same participants continued on their respective diets for an additional 6 months, under self-selected conditions, in order to gain insights into the real life effectiveness of this diet.

### Key Messages

- By comparison with the high-carbohydrate diet, consumption of the low-carbohydrate diet containing vegetable proteins and oils was also associated with significantly reduced concentrations of LDL-C. This LDL-C reduction has not been reported for other low-carbohydrate diet studies in which a large part of the protein and fat originated from animal sources, ~~and where increases in LDL-C were seen.~~
- The present study also demonstrated that consumption of a low-carbohydrate vegan diet resulted in modestly greater body weight reductions compared to a high-carbohydrate diet (7% versus 6% reductions, respectively) over a six-month ad libitum period.

- 1  
2  
3 - The sustained reduction in LDL-C, associated with only a small incremental weight loss on  
4 the 6-month self-selected diet, is a potentially important attribute of the diet in reducing long-  
5 term CHD risk  
6  
7  
8  
9

### 10 11 12 **Strengths and Limitations of this Study**

13 The study weaknesses include the relatively small sample size and the high dropout rate.

14  
15 Nevertheless, high dropout rates have been reported in similar dietary studies and it is  
16 noteworthy that attrition rates were low in the metabolic study when all food was provided [1].

17 Food availability and preparation may therefore be important factors. For those who did  
18 complete the study, however, there were benefits in weight loss and LDL-C reduction, an  
19 additional 2% advantage in body weight reduction compared to the high-carbohydrate diet and a  
20 13% drop in LDL-C for participants consuming a more plant-based low-carbohydrate diet.  
21

22 The study's strength is that the prescribed hypocaloric diet was self-selected, meaning the results  
23 are more in line with what can be expected under free-living conditions. The breadth of  
24 application of the plant-based low-carbohydrate diet, however, remains to be determined, but it  
25 may provide an option for some individuals for whom LDL-C reduction is an equal concern to  
26 weight loss. If low-carbohydrate dietary options become more generally available the number of  
27 individuals who will benefit is likely to increase.  
28  
29  
30  
31  
32  
33  
34  
35  
36  
37  
38  
39  
40  
41  
42  
43  
44  
45  
46  
47  
48  
49  
50  
51  
52  
53  
54  
55  
56  
57  
58  
59  
60

## Introduction

Many popular weight loss diets emphasize carbohydrate restriction (Atkins, Eddies, South Beach, Zone). Their success is determined by the level of compliance with the prescribed diets [2-7]. However, a high content of animal products, rich in saturated fat and cholesterol, may make conventional low-carbohydrate diets less appropriate for those with hypercholesterolemia [3 8]. Even during active weight loss, these high saturated fat diets ~~do not lower, may raise~~ serum LDL-C ~~below~~ ~~above~~ baseline [3 8] and there is concern that if such diets continue to be eaten when weight loss has ceased, a more atherogenic blood lipid profile may result [9]. These concerns have prompted exploration of other weight loss strategies, but only modest reductions in LDL-C have been observed [10].

By contrast vegan diets significantly lower LDL-C [11]. Trials of vegan and vegetarian diets also reduce progression of coronary heart disease (CHD) [12] and improve diabetes control [13].

Plant food components such as vegetable proteins, vegetable oils, nuts and viscous fibers, reduce serum lipids in many studies [14-19] and may increase flow mediated vasodilatation [20-23].

Nuts, fiber and vegetarian diets in general, all reduce CHD and diabetes in cohort studies [24-29]. Finally, in cohort studies, low-carbohydrate diets, high in vegetable oils and proteins as opposed to animal products, reduce CHD events and diabetes incidence in women [30 31], while lower red meat intake reduces total, cardiovascular and cancer mortality [32]. Most recently a large randomized controlled trial confirmed the effect of nuts and increased vegetable oil (olive oil) intake in reducing cardiovascular events in the context of a Mediterranean diet [33].

In view of the apparent success of low-carbohydrate diets for weight loss and the demonstration that relatively high-carbohydrate vegetarian and vegan diets, and diets low in animal products, lower CHD risk factors [34-37], we designed a diet that combined both vegan and low-

1  
2  
3 carbohydrate elements to determine whether such a diet captured both the weight loss and CHD  
4 risk reduction advantages. We have already reported the effect of this dietary strategy in  
5 producing a difference of 8% in LDL-C reduction between calorie-restricted diets (60% of  
6 estimated calorie requirements) when all food was provided [1]. We now report findings after  
7 these same participants continued on their respective diets for an additional 6 months, under self-  
8 selected conditions, in order to gain insights into the real life effectiveness of this diet. The  
9 results of the metabolic (all foods provided) study have been reported previously and had  
10 demonstrated a CHD risk factor advantage, but with no greater weight loss than the control diet  
11 [1].  
12  
13  
14  
15  
16  
17  
18  
19  
20  
21  
22  
23  
24  
25  
26

## 27 **Methods**

### 28 **Participants**

29  
30 Forty-seven overweight participants, recruited by newspaper advertisement and hospital clinic  
31 notices, undertook the one-month metabolic first phase of the study (Figure 1) that has been  
32 previously reported [1]. At the start of the study, participants were given the option to participate  
33 in both the metabolic and ad libitum phases or only the metabolic phase. On completion of the  
34 metabolic phase, thirty-nine participants (19 control and 20 test participants) continued for an  
35 ad libitum six-month study (Table 1). The study was conducted at a Canadian university-  
36 affiliated hospital nutrition research center from April 2005 to November 2006. All participants  
37 had high normal to raised LDL-C levels ( $>3.4\text{mmol/L}$  at diagnosis) and a body mass index  $> 27$   
38  $\text{kg/m}^2$ . Details of the eligibility criteria have been previously reported [1]. After recruitment, the  
39 11/39 participants who were taking lipid lowering medications discontinued their lipid-lowering  
40 medications at least two weeks prior to starting and for the study duration (Table 1).  
41  
42  
43  
44  
45  
46  
47  
48  
49  
50  
51  
52  
53  
54  
55  
56  
57  
58  
59  
60

## Study Protocol

The intervention was a randomized parallel study stratified by sex in which participants were randomized to either low- or high-carbohydrate, calorie-reduced diets. The first month was the previously reported metabolically controlled study [1]. For the following six-months, participants continued on the diet to which they had been assigned as a self-selected (ad libitum) diet.

Anthropometric, blood pressure and blood lipid measurements were repeated at monthly intervals. Insulin and HbA1c were measured at baseline and at the start and end of the ad libitum treatment. Percentage body fat was measured at baseline and end of the ad libitum treatment by bioelectrical impedance (Quantum II; RJL Systems, Clinton Township, Michigan). Seven-day diet and exercise histories were recorded in the week prior to each monthly visit. These histories were reviewed and discussed with the dietitian and appropriate dietary counselling was provided to enhance adherence. The overall feeling of satiety for the previous week was assessed at each study visit using a 9-point bipolar semantic scale, where -4 was extremely hungry, 0 was neutral, and +4 was uncomfortably full [1 35]. No exercise advice was given during the study, There was no prescription related to exercise where but Aalterations in exercise were allowed and recorded.

The Ethics Committees of St. Michael's Hospital and the University of Toronto, and the Therapeutic Products Directorate of Health Canada approved the study. Written informed consent was obtained from the participants. The study's clinical trial registration number was #NCT00256516.

## Diets

1  
2  
3 As with the previous metabolic study, participants were encouraged to eat only 60% of their  
4 estimated caloric requirements in order to continue the body weight reduction started on their  
5 metabolic phase [38-40]. The prescribed test diet was a low-carbohydrate vegan diet containing  
6 26% of calories from carbohydrate, 31% of calories from vegetable proteins and 43% from fat  
7 (primarily vegetable oils). Carbohydrate sources on the low-carbohydrate diet featured viscous  
8 fiber-containing foods (such as oats and barley) and low-starch vegetables (emphasizing okra  
9 and eggplant) for the relatively limited amount of carbohydrate allowed. The vegetable proteins  
10 were prescribed as gluten (54.8% of total protein), soy (23.0%), fruits and vegetables (8.7%),  
11 nuts (7.5%), and cereals (6.0%). Gluten was contained in the nut bread and wheat gluten (also  
12 called “seitan”) products. Soy protein was present in the form of burgers, veggie bacon, deli  
13 slices, breakfast links, tofu, and soy milks. Nuts included almonds, cashews, hazelnuts,  
14 macadamia, pecans, and pistachios. The fat sources were nuts (43.6% of total fat), vegetable oils  
15 (24.4%), soy products (18.5%), avocado (7.1%), cereals (2.7%), fruits and vegetables (2.3%),  
16 and seitan products (1.4%). Participants were able to purchase at the research center the “no”  
17 starch high protein nut bread and three of the seitan (wheat gluten) products used in the study  
18 which were not available in Canada. The control, high-carbohydrate lacto-ovo vegetarian diet  
19 (58% carbohydrate, 16% protein and 25% fat) emphasized whole wheat cereals and cereal fiber,  
20 as well as low-fat or skim milk dairy products and liquid egg substitute to reduce saturated fat  
21 and cholesterol intakes. These diets have been published previously [1]. Participants were given  
22 a copy of the menu plans that outlined the food items and amounts prescribed during the  
23 metabolic phase. This served as a reference during the ad libitum phase. Furthermore,  
24 participants were given an exchange list of the items prescribed on the menu plan. The goal was  
25 to enhance adherence.  
26  
27  
28  
29  
30  
31  
32  
33  
34  
35  
36  
37  
38  
39  
40  
41  
42  
43  
44  
45  
46  
47  
48  
49  
50  
51  
52  
53  
54  
55  
56  
57  
58  
59  
60

1  
2  
3 Self-taring electronic scales (My Weigh Scales, Vancouver, BC or Tanita Corporation, Arlington  
4 Heights, IL) were provided to all participants and they were instructed to weigh all food items  
5  
6 while recording the seven-day food diary in the week prior to monthly clinic visits. Adherence  
7  
8 to the three principal cholesterol-lowering components [vegetable proteins (soy and gluten), nuts,  
9 and viscous fibers] of the low-carbohydrate diet was assessed from the completed monthly  
10  
11 seven-day food records. The amount of each component provided during the metabolic phase  
12  
13 remained the same as that prescribed during the ad libitum phase.  
14  
15  
16  
17  
18  
19

20 Neither the dietitians nor participants could be blinded, but equal emphasis was placed on the  
21  
22 potential importance for health of both diets. The analytical technicians were blinded to diet  
23  
24 allocation, as was the statistician, up to analysis of the primary outcome. Participants were  
25  
26 offered no financial compensation for participation in the study.  
27  
28  
29  
30  
31

### 32 **Analyses**

33  
34 The analytical techniques have been reported previously [1]. Serum was analyzed ~~according to~~  
35  
36 ~~the Lipid Research Clinics protocol~~ in the J. Alick Little Lipid Research Laboratory [35] and  
37  
38 LDL-C (in mmol/L) was calculated by the method of Friedewald et al. [1]. The methods for  
39  
40 analyzing apolipoproteins A1 and B, high sensitivity C-reactive protein (hs-CRP), blood  
41  
42 glucose, insulin, HbA1c, and homeostasis model assessment – insulin resistance model (HOMA-  
43  
44 IR) have been described previously [1]. Exercise data were calculated as metabolic equivalents  
45  
46 (METs) [41]. The absolute 10-year CHD risk score was calculated using the Framingham risk  
47  
48 equation [42].  
49  
50  
51  
52

53 Diets were assessed for macronutrients, fatty acids, cholesterol and fiber using a computer  
54  
55 program based on the USDA database [43] and developed in our laboratory to allow the addition  
56  
57  
58  
59  
60



1  
2  
3 of the macronutrient content of study foods obtained from food labels or directly from food  
4  
5 manufacturers. The nutritional profiles of the diets were calculated from the 7-day food records  
6  
7 completed once a month throughout the study and mean intakes are presented.  
8  
9

10 Adherence with the three principal cholesterol-lowering components [vegetable proteins (soy  
11 and gluten), nuts, and viscous fibers] of the low-carbohydrate diet was estimated from the 7-day  
12 food records by applying 33.3% adherence factor to the recorded intake for each of the three  
13 main components. The sum of the three components if consumed as prescribed would equal  
14  
15 100% adherence.  
16  
17  
18  
19  
20  
21

## 22 23 24 **Statistical Analyses**

25 Results are expressed as means  $\pm$  SEM or 95% confidence intervals (CIs). Time zero was used as  
26 the baseline and refers to the pre-metabolic study baseline [1]. Treatment differences in physical  
27 and biochemical measures were assessed using all available data and a repeated measures mixed  
28 model accounting for time of assessment (SAS 9.2) [44] in the Tables (Table 2 and 3) and the  
29 Results. The response variable was change from baseline, with diet and week as fixed effects and  
30 subject ID nested in diet. There was no adjustment for baseline. Any participant who started the  
31 ad libitum treatment was included in the analysis (N=39). The completer analysis included the 23  
32 participants who completed the study.  
33  
34  
35  
36  
37  
38  
39  
40  
41  
42  
43  
44  
45

46 Multiple imputation (taking the mean of 5 sets of randomly imputed values) was used to present  
47 baseline and treatment values in the Tables (2 and 3) and Figures (2 and 3) by generating data for  
48 those who dropped out or had missing values [44].  
49  
50  
51  
52  
53  
54

## 55 **Results**

56  
57  
58  
59  
60

1  
2  
3 Compliance with the major dietary components [vegetable proteins (soy and gluten), nuts, and  
4 viscous fibers] was 33.6% or one-third of that prescribed during the metabolic phase (Table 2).  
5  
6 Saturated fat intakes were similar on both treatments whereas intake of monounsaturated fats,  
7  
8 vegetable proteins, and soy protein were significantly higher on the low-carbohydrate diet (Table  
9  
10  
11  
12  
13 2). Available carbohydrate intake was significantly lower on the low-carbohydrate diet (Table 2).

14  
15 The attrition dropout rate was 50.35% (710/20) on the low-carbohydrate and 32.26% (65/19) on  
16  
17 the high-carbohydrate (Figure 1). this equates to a total attrition dropout rate of 43.1% (16/39).

18  
19 The number of participants who did not complete the study (including dropouts and withdrawals)  
20  
21 did not differ between treatments. Three participants were withdrawn by the study physician due  
22  
23

24 to failure to attain LDL-C targets on the low-carbohydrate diet (mean LDL-C = 5.24mmol/L)

25 and one subject on the high-carbohydrate diet (LDL-C = 7.78mmol/L). Participants on the low-

26  
27 carbohydrate diet tended to have larger reductions in body weight over time (Figure 2). The

28  
29 weight loss from baseline to the end of the 6-month ad libitum treatment was -6.9kg [95% CI, -

30  
31 7.7, -6.1] on the low-carbohydrate and -5.8kg [95% CI, -6.6, -5.1] on the control diet with a

32  
33 significant difference between groups (treatment difference [95% CI]: -1.1kg [-2.1, 0.0];

34  
35 P=0.047) (Table 3). The final reduction in BMI was also greater on the low-carbohydrate versus

36  
37 high-carbohydrate diet (treatment difference [95% CI]: -0.4kg/m<sup>2</sup> [-0.8, 0.0]; P=0.039) (Table 3).

38  
39 Among the completers, there were numerically larger differences between treatments for both

40  
41 body weight and BMI (treatment difference [95% CI]: -1.8 kg [-3.0, -0.6]; P=0.0041 and -0.7

42  
43 kg/m<sup>2</sup> [-1.1, -0.2]; P=0.0039, respectively).

44  
45 There was a relative increase in recorded exercise by the high-carbohydrate diet participants,

46  
47 whereas there was no relative change in the low-carbohydrate participants (treatment difference

48  
49 [95% CI]: -9.3 [-16.4, -2.2] METs; P=0.012), but this was not reflected in a greater weight loss

(Table 3). There were no treatment differences in percent body fat, waist circumference or satiety (Table 3).

## Lipids

At the end of the study, the reduction on the low-carbohydrate versus high-carbohydrate diet was greater for LDL-C (treatment difference [95% CI]: -0.49mmol/L [-0.70, -0.28];  $P<0.001$ , for TC (-0.62mmol/L [-0.86, -0.37];  $P<0.001$ , for TC:HDL-C -0.57 [-0.83, -0.32];  $P<0.001$ , for LDL-C:HDL-C (-0.42 [-0.60, -0.24];  $P<0.001$ , and for triglycerides (-0.34mmol/L [-0.57, -0.11];  $P=0.005$ ). No treatment difference was seen in HDL-C (Table 3). A similar pattern was observed in the completers. The treatment difference was numerically larger for LDL-C (-0.60mmol/L [-0.84, -0.36];  $P<0.0001$ ), TC (-0.73mmol/L [-1.00, -0.45];  $P<0.0001$ ), TC:HDL-C (-0.68 [-0.97, -0.39];  $P<0.0001$ ), and LDL-C:HDL-C (-0.53 [-0.73, -0.32];  $P<0.0001$ ). Values for LDL-C and the TC:HDL-C ratio were consistently lower in participants on the low-carbohydrate diet throughout the study while HDL-C values were not different from baseline (Figure 3 A-C).

## Apolipoproteins

ApoB and the ApoB:A1 ratio were reduced more on the low- versus the high-carbohydrate diet at the end of the study (treatment different [95% CI]: -0.11g/L [-0.16, -0.06];  $P<0.001$  and -0.05 [-0.09, -0.02];  $P=0.003$ , respectively) (Table 3). No significant difference between the diets was observed for ApoA1 concentrations. The pattern of change in the apolipoproteins in the completers reflected the changes seen in the whole group. Figure 3D and 3F show that the low-carbohydrate diet resulted in lower apoB and ApoB:ApoA1 ratios relative to baseline over the course of the study.

## C-Reactive Protein, HbA1c, Blood Glucose, Serum Insulin, Insulin Resistance and Blood Pressure

Both treatments reduced hs-CRP with no difference between treatments (Table 3). HbA1c, fasting blood glucose, insulin, and insulin resistance (calculated using the HOMA model) fell similarly on both treatments during the course of the study (Table 3). Systolic and diastolic blood pressure decreased similarly with no treatment differences (Table 3). [The completers also failed to show a difference between treatments.](#)

## Calculated CHD Risk

The low-carbohydrate diet significantly reduced the calculated 10-year CHD risk relative to the high-carbohydrate diet (2% [-2, -1];  $P < 0.001$ ) (Table 3). [A reduced CHD risk on the low-carbohydrate diet was also observed in the completers \(2% \[-3, -1\];  \$P < 0.001\$ \).](#)

## Adverse Events

No serious adverse events or events that involved hospitalisation occurred during the study.

## Discussion

The present study demonstrated that consumption of a low-carbohydrate vegan diet resulted in a modestly greater body weight reduction compared to a high-carbohydrate diet (7% versus 6% reductions, respectively) over a six-month ad libitum period. These reductions were similar to those reported for low-carbohydrate “Atkins-like” diets [2 3 6 10]. However by comparison with the high-carbohydrate diet, consumption of the low-carbohydrate diet containing vegetable

1  
2  
3 proteins and oils was also associated with significantly reduced concentrations of LDL-C. This  
4  
5 LDL-C reduction has not been reported for other low-carbohydrate diet studies in which a large  
6  
7 part of the protein and fat originated from animal sources and in which no significant LDL-C  
8  
9 reductions were seen where increases in LDL-C were seen [2-6 8]. The sustained reduction in  
10  
11 LDL-C, associated with only a small incremental weight loss on the 6-month self-selected diet, is  
12  
13 a potentially important attribute of the diet in reducing long-term CHD risk [45 46]. Furthermore,  
14  
15 as seen in the present study, a low-carbohydrate diet, in which vegetable fat and protein options  
16  
17 were encouraged, demonstrated a larger reduction in the TC:HDL-C ratio than that reported at 6  
18  
19 months in weight loss studies employing either a Mediterranean or a high-carbohydrate diet [10].  
20  
21 The majority of studies undertaken to date have been 6 months to one year in duration [2-6 47]  
22  
23 with more recent studies of up to 2 years [2 8] and, as with the present study, a number of these  
24  
25 studies had a high dropout rate [2 3 5 47]. The high dropout rate in the present study did not  
26  
27 prevent identification of significant LDL-C and body weight differences in the intent-to-treat  
28  
29 analysis (using all available data). However, the completer data demonstrated an even larger  
30  
31 treatment difference in LDL-C ~~of -0.60mmol/L [-0.84, -0.36]~~ favoring the low-carbohydrate test  
32  
33 treatment (P<0.001). Those on the low-carbohydrate diet showed overall adherence to the major  
34  
35 dietary components [vegetable proteins (soy and gluten), nuts, and viscous fibers] at 33.6% of  
36  
37 that provided during the metabolic phase [1]. This adherence is similar to the 43.3% seen with  
38  
39 the dietary portfolio in the comparison of the metabolic one month [35] and the ad libitum six  
40  
41 month studies [48]. In this comparison also just under half the LDL-C reduction (13-14%) seen  
42  
43 on the ad libitum compared to the metabolic study [35].  
44  
45  
46  
47  
48  
49  
50  
51  
52

53 The effect of low-carbohydrate diets on CHD events has not been assessed in randomized  
54  
55 controlled trials. Nevertheless, low-carbohydrate diets high in vegetable proteins and oils have  
56  
57  
58  
59  
60

1  
2  
3 been associated with a 30% reduced CHD risk and an 18% reduced incidence of diabetes in  
4 cohort studies [30 31]. The median interquartile difference in these studies between the first and  
5  
6 10<sup>th</sup> decile for vegetable protein and monounsaturated fat (MUFA) intakes, as a marker of  
7  
8 increased vegetable oil consumption, was 1.4% and 9.3% expressed as a percentage of total  
9  
10 caloric intake [30]. These figures compare with a 8.2% and a 4.6% relative increase in vegetable  
11  
12 protein and oil consumption from baseline on the Eco-Atkins diet compared to the control diet.  
13  
14 The increases in MUFA were therefore seen in both studies. Recently a Spanish Mediterranean  
15  
16 diet emphasizing increased nut or olive oil consumption, increasing monounsaturated fat intake  
17  
18 by 2-3%, has been shown to significantly reduce cardiovascular events also by approximately  
19  
20 30% [33]. These data provide consistent support for the view that the Eco-Atkins approach  
21  
22 would reduce CHD risk in the long term.  
23  
24  
25  
26  
27

28  
29 The present diet, while lowering LDL-C by 9%, did not result in any significant depression of  
30  
31 HDL-C. Lowering LDL-C while maintaining HDL-C would be expected to reduce CHD risk [45  
32  
33 46]. Similarly, reductions in ApoB and the ApoB:A1 ratio were also observed in the present  
34  
35 study. These findings further support the potential CHD benefit that this weight loss diet may  
36  
37 have [49-51]. It has also been claimed that apolipoproteins may be stronger predictors of CHD  
38  
39 events than conventional lipid variables [52-54].  
40  
41  
42

43  
44 In contrast to the metabolic study, the reductions in systolic and diastolic blood pressure were not  
45  
46 significant between the [low- and high-carbohydrate](#) diets. Similarly, hs-CRP was unchanged  
47  
48 between treatments, however, the level was significantly reduced with the low-carbohydrate diet  
49  
50 compared to baseline. Studies have shown that hs-CRP tended to be lowest on the diets  
51  
52 containing the highest proportion of carbohydrate [5]. Low glycemic index and low glycemic  
53  
54 load diets have also been associated with lower hs-CRP concentrations [55 56]. These  
55  
56  
57  
58  
59  
60

1  
2  
3 advantages of the higher carbohydrate diet may have reduced any hs-CRP difference between the  
4  
5 two diets in the present study.  
6

7  
8 Soy-containing foods as well as nuts have cholesterol lowering effects [15 17 18 57 58] and may  
9  
10 explain the reduction in LDL-C. Viscous fiber in low starch vegetables and  $\beta$ -glucan in oats and  
11  
12 barley may also have contributed to the overall cholesterol lowering effect of the diet [9 14 45].  
13  
14 Furthermore, nuts and high fiber food consumption have been associated with lower body weight  
15  
16 [59].  
17

18  
19 The study weaknesses include the relatively small sample size and the high dropout rate.  
20

21  
22 Nevertheless, high dropout rates have been reported in similar dietary studies and it is  
23  
24 noteworthy that attrition rates were low in the metabolic study when all food was provided [1].  
25  
26

27 Food availability and preparation may therefore be important factors. Future studies will need to  
28  
29 focus on strategies to increase and maintain adherence, especially to the cholesterol lowering  
30  
31 components, which all bear US FDA health claims for cardiovascular disease risk reduction.  
32  
33 Furthermore, collaboration with food industry may be helpful in addressing concerns of  
34  
35 availability, variety, and ease of preparation. In retrospect, a simplified one page eating plan for  
36  
37 breakfast, lunch, and dinner with a number of options and amounts for each meal, as we have  
38  
39 used in our dietary portfolio studies, might also be helpful [48]. For those who did complete the  
40  
41 study, however, there were benefits in weight loss and LDL-C reduction, an additional 2%  
42  
43 advantage in body weight reduction compared to the high-carbohydrate diet and a 13% drop in  
44  
45 LDL-C for participants consuming a more plant-based low-carbohydrate diet. Unfortunately it  
46  
47 was not possible to predict who would complete the diet based on pre-study data or changes  
48  
49 observed during the metabolic phase.  
50  
51  
52  
53  
54  
55  
56  
57  
58  
59  
60

1  
2  
3 The study's strength is that the prescribed hypocaloric diet was self-selected, meaning the results  
4 are more in line with what can be expected under free-living conditions. The breadth of  
5 application of the plant-based low-carbohydrate diet, however, remains to be determined, but it  
6 may provide an option for some individuals for whom LDL-C reduction is an equal concern to  
7 weight loss. If low-carbohydrate dietary options become more generally available the number of  
8 individuals who will benefit is likely to increase.  
9

10 We conclude that a weight loss diet which reduced carbohydrate in exchange for increased  
11 intakes of vegetable sources of protein, such as gluten, soy and nuts, together with vegetable oils  
12 offers an opportunity to improve both LDL-C and body weight, both being risk factors for CHD.  
13 Further trials are warranted to evaluate low-carbohydrate diets, including more plant-based low-  
14 carbohydrate diets, on CHD risk factors and ultimately on CHD.  
15  
16  
17  
18  
19  
20  
21  
22  
23  
24  
25  
26  
27  
28  
29  
30  
31  
32  
33  
34  
35  
36  
37  
38  
39  
40  
41  
42  
43  
44  
45  
46  
47  
48  
49  
50  
51  
52  
53  
54  
55  
56  
57  
58  
59  
60



### **Acknowledgements**

We thank all the study participants for their attention to detail and enthusiasm.

Dr. Jenkins, together with those responsible for analysis and interpretation of data, had full access to all the data in the study and takes responsibility for the integrity of the data and the accuracy of the data analysis.

### **Sources of Funding**

This study was supported by Solae, LLC; Loblaw Companies Limited, and the Canada Research Chair Program of the Federal Government of Canada. Dr. Wong was a recipient of a Canadian Institutes of Health Research (CIHR) Doctoral Research Award, and is now a holder of a CIHR Randomized Controlled Trials – Mentoring Program Training Grant.

### **Role of the Sponsors**

None of the funding organizations or sponsors played any significant role in the design and conduct of the study, in the collection, management, analysis, and interpretation of the data, or in the preparation, or approval of the manuscript. However, the named co-authors from Solae LLC reviewed the manuscript.

### **Disclosures**

Dr. Jenkins has served on the Scientific Advisory Board of Sanitarium Company, Agri-Culture and Agri-Food Canada (AAFC), Canadian Agriculture Policy Institute (CAPI), California Strawberry Commission, Loblaw Supermarket, Herbal Life International, Nutritional Fundamental for Health, Pacific Health Laboratories, Metagenics, Bayer Consumer Care, Orafti,

1  
2  
3 Dean Foods, Kellogg's, Quaker Oats, Procter & Gamble, Coca-Cola, NuVal Griffin Hospital,  
4  
5 Abbott, Pulse Canada, Saskatchewan Pulse Growers, and Canola Council of Canada; received  
6  
7 honoraria for scientific advice from Sanitarium Company, Orafti, the Almond Board of  
8  
9 California, the American Peanut Council, International Tree Nut Council Nutrition Research and  
10  
11 Education Foundation and the Peanut Institute, Herbal Life International, Pacific Health  
12  
13 Laboratories, Nutritional Fundamental for Health, Barilla, Metagenics, Bayer Consumer Care,  
14  
15 Unilever Canada and Netherlands, Solae LLC, Oldways, Kellogg's, Quaker Oats, Procter &  
16  
17 Gamble, Coca-Cola, NuVal Griffin Hospital, Abbott, Canola Council of Canada, Dean Foods,  
18  
19 California Strawberry Commission, Haine Celestial, Pepsi, and Alpro Foundation; has been on  
20  
21 the speakers panel for the Almond Board of California; received research grants from  
22  
23 Saskatchewan Pulse Growers, the Agricultural Bioproducts Innovation Program (ABIP) through  
24  
25 the Pulse Research Network (PURENet), Advanced Food Materials Network (AFMNet),  
26  
27 Loblaw, Unilever, Barilla, Almond Board of California, Coca-Cola, Solae LLC, Haine Celestial,  
28  
29 Sanitarium Company, Orafti, International Tree Nut Council Nutrition Research and Education  
30  
31 Foundation and the Peanut Institute, the Canola and Flax Councils of Canada, Calorie Control  
32  
33 Council, Canadian Institutes of Health Research, Canada Foundation for Innovation, and the  
34  
35 Ontario Research Fund; and received travel support to meetings from the Solae LLC, Sanitarium  
36  
37 Company, Orafti, AFMNet, Coca-Cola, The Canola and Flax Councils of Canada, Oldways  
38  
39 Preservation Trust, Kellogg's, Quaker Oats, Griffin Hospital, Abbott Laboratories, Dean Foods,  
40  
41 the California Strawberry Commission, American Peanut Council, Herbal Life International,  
42  
43 Nutritional Fundamental for Health, Metagenics, Bayer Consumer Care, AAFC, CAPI, Pepsi,  
44  
45 Almond Board of California, Unilever, Alpro Foundation, International Tree Nut Council,  
46  
47 Barilla, Pulse Canada, and the Saskatchewan Pulse Growers. Dr Jenkins' wife is a director of  
48  
49  
50  
51  
52  
53  
54  
55  
56  
57  
58  
59  
60

1  
2  
3 Glycemic Index Laboratories, Toronto, Ontario, Canada. Dr. Kendall reported being on speakers  
4  
5 bureaus for Almond Board of California, Solae LLC, and Unilever; and receiving research grants  
6  
7  
8 from CIHR, Unilever, Solae LLC, Loblaw Brands Ltd, International Tree Nut Council, and  
9  
10 Almond Board of California. Mr. Vidgen has received partial salary funding from research  
11  
12 grants provided by Unilever, Loblaws, and the Almond Board of California. Drs. Paul,  
13  
14 Mukherjea, and Krul are employees of Solae, LLC.  
15  
16  
17  
18  
19  
20  
21  
22  
23  
24  
25  
26  
27  
28  
29  
30  
31  
32  
33  
34  
35  
36  
37  
38  
39  
40  
41  
42  
43  
44  
45  
46  
47  
48  
49  
50  
51  
52  
53  
54  
55  
56  
57  
58  
59  
60

## References

1. Jenkins DJ, Wong JM, Kendall CW, et al. The effect of a plant-based low-carbohydrate ("Eco-Atkins") diet on body weight and blood lipid concentrations in hyperlipidemic subjects. *Arch Intern Med* 2009;**169**(11):1046-54 doi: 10.1001/archinternmed.2009.115[published Online First: Epub Date]].
2. Samaha FF, Iqbal N, Seshadri P, et al. A low-carbohydrate as compared with a low-fat diet in severe obesity. *N Engl J Med* 2003;**348**(21):2074-81
3. Foster GD, Wyatt HR, Hill JO, et al. A randomized trial of a low-carbohydrate diet for obesity. *N Engl J Med* 2003;**348**(21):2082-90
4. Stern L, Iqbal N, Seshadri P, et al. The effects of low-carbohydrate versus conventional weight loss diets in severely obese adults: one-year follow-up of a randomized trial. *Ann Intern Med* 2004;**140**(10):778-85
5. Dansinger ML, Gleason JA, Griffith JL, et al. Comparison of the Atkins, Ornish, Weight Watchers, and Zone diets for weight loss and heart disease risk reduction: a randomized trial. *JAMA* 2005;**293**(1):43-53
6. Gardner CD, Kiazand A, Alhassan S, et al. Comparison of the Atkins, Zone, Ornish, and LEARN diets for change in weight and related risk factors among overweight premenopausal women: the A TO Z Weight Loss Study: a randomized trial. *JAMA* 2007;**297**(9):969-77
7. Sacks FM, Bray GA, Carey VJ, et al. Comparison of weight-loss diets with different compositions of fat, protein, and carbohydrates. *N Engl J Med* 2009;**360**(9):859-73 doi: 10.1056/NEJMoa0804748[published Online First: Epub Date]].

- 1  
2  
3 8. Foster GD, Wyatt HR, Hill JO, et al. Weight and metabolic outcomes after 2 years on a low-  
4  
5 carbohydrate versus low-fat diet: a randomized trial. *Ann Intern Med* 2010;**153**(3):147-57  
6  
7 doi: 10.1059/0003-4819-153-3-201008030-00005[published Online First: Epub Date]].  
8  
9
- 10 9. Anderson JW, Randles KM, Kendall CW, et al. Carbohydrate and fiber recommendations for  
11  
12 individuals with diabetes: a quantitative assessment and meta-analysis of the evidence.  
13  
14 *Journal of the American College of Nutrition* 2004;**23**(1):5-17  
15  
16
- 17 10. Shai I, Schwarzfuchs D, Henkin Y, et al. Weight loss with a low-carbohydrate,  
18  
19 Mediterranean, or low-fat diet. *N Engl J Med* 2008;**359**(3):229-41  
20  
21
- 22 11. Sacks FM, Ornish D, Rosner B, et al. Plasma lipoprotein levels in vegetarians. The effect of  
23  
24 ingestion of fats from dairy products. *JAMA* 1985;**254**(10):1337-41  
25  
26
- 27 12. Ornish D, Brown SE, Scherwitz LW, et al. Can lifestyle changes reverse coronary heart  
28  
29 disease? The Lifestyle Heart Trial. *Lancet* 1990;**336**(8708):129-33  
30  
31
- 32 13. Barnard ND, Cohen J, Jenkins DJ, et al. A low-fat vegan diet improves glycemic control and  
33  
34 cardiovascular risk factors in a randomized clinical trial in individuals with type 2  
35  
36 diabetes. *Diabetes care* 2006;**29**(8):1777-83  
37  
38
- 39 14. Jenkins DJ, Newton C, Leeds AR, et al. Effect of pectin, guar gum, and wheat fibre on  
40  
41 serum-cholesterol. *Lancet* 1975;**1**(7916):1116-7  
42  
43
- 44 15. Sirtori CR, Agradi E, Conti F, et al. Soybean-protein diet in the treatment of type-II  
45  
46 hyperlipoproteinaemia. *Lancet* 1977;**1**(8006):275-7  
47  
48
- 49 16. Grundy SM. Comparison of monounsaturated fatty acids and carbohydrates for lowering  
50  
51 plasma cholesterol. *N Engl J Med* 1986;**314**(12):745-8  
52  
53
- 54 17. Anderson JW, Johnstone BM, Cook-Newell ME. Meta-analysis of the effects of soy protein  
55  
56 intake on serum lipids. *N Engl J Med* 1995;**333**(5):276-82  
57  
58  
59  
60

- 1  
2  
3  
4  
5  
6  
7  
8  
9  
10  
11  
12  
13  
14  
15  
16  
17  
18  
19  
20  
21  
22  
23  
24  
25  
26  
27  
28  
29  
30  
31  
32  
33  
34  
35  
36  
37  
38  
39  
40  
41  
42  
43  
44  
45  
46  
47  
48  
49  
50  
51  
52  
53  
54  
55  
56  
57  
58  
59  
60
18. Kris-Etherton PM, Yu-Poth S, Sabate J, et al. Nuts and their bioactive constituents: effects on serum lipids and other factors that affect disease risk. *Am J Clin Nutr* 1999;**70**(3 Suppl):504S-11S
  19. Sabate J, Oda K, Ros E. Nut consumption and blood lipid levels: a pooled analysis of 25 intervention trials. *Arch Intern Med* 2010;**170**(9):821-7 doi: 10.1001/archinternmed.2010.79[published Online First: Epub Date].
  20. Ros E, Nunez I, Perez-Heras A, et al. A walnut diet improves endothelial function in hypercholesterolemic subjects: a randomized crossover trial. *Circulation* 2004;**109**(13):1609-14 doi: 10.1161/01.CIR.0000124477.91474.FF[published Online First: Epub Date].
  21. Zhao G, Etherton TD, Martin KR, et al. Dietary alpha-linolenic acid reduces inflammatory and lipid cardiovascular risk factors in hypercholesterolemic men and women. *J Nutr* 2004;**134**(11):2991-7
  22. West SG, Krick AL, Klein LC, et al. Effects of diets high in walnuts and flax oil on hemodynamic responses to stress and vascular endothelial function. *Journal of the American College of Nutrition* 2010;**29**(6):595-603
  23. Sahoo PK, Behera P. Synthesis and biological screening of some novel amidocarbamate derivatives of ketoprofen.[Retraction in *Eur J Med Chem.* 2012 Jan;**47**(1):626; PMID: 22355807]. *European Journal of Medicinal Chemistry* 2010;**45**(7):3162-8
  24. Appleby PN, Thorogood M, Mann JI, et al. The Oxford Vegetarian Study: an overview. *Am J Clin Nutr* 1999;**70**(3 Suppl):525S-31S
  25. Fraser GE. *Diet, life expectancy, and chronic disease: studies of Seventh-Day Adventists and other vegetarians*. New York: Oxford University Press, 2003.

- 1  
2  
3 26. Pereira MA, O'Reilly E, Augustsson K, et al. Dietary fiber and risk of coronary heart disease:  
4 a pooled analysis of cohort studies. *Arch Intern Med* 2004;**164**(4):370-6  
5  
6  
7  
8 27. Li TY, Brennan AM, Wedick NM, et al. Regular consumption of nuts is associated with a  
9 lower risk of cardiovascular disease in women with type 2 diabetes. *J Nutr*  
10 2009;**139**(7):1333-8 doi: 10.3945/jn.108.103622[published Online First: Epub Date]].  
11  
12  
13 28. Kris-Etherton PM, Hu FB, Ros E, et al. The role of tree nuts and peanuts in the prevention of  
14 coronary heart disease: multiple potential mechanisms. *J Nutr* 2008;**138**(9):1746S-51S  
15  
16  
17 29. Pan A, Sun Q, Manson JE, et al. Walnut consumption is associated with lower risk of type 2  
18 diabetes in women. *J Nutr* 2013;**143**(4):512-8 doi: 10.3945/jn.112.172171[published  
19 Online First: Epub Date]].  
20  
21  
22 30. Halton TL, Willett WC, Liu S, et al. Low-carbohydrate-diet score and the risk of coronary  
23 heart disease in women. *N Engl J Med* 2006;**355**(19):1991-2002  
24  
25  
26 31. Halton TL, Liu S, Manson JE, et al. Low-carbohydrate-diet score and risk of type 2 diabetes  
27 in women. *Am J Clin Nutr* 2008;**87**(2):339-46 doi: 87/2/339 [pii][published Online First:  
28 Epub Date]].  
29  
30  
31 32. Pan A, Sun Q, Bernstein AM, et al. Red meat consumption and mortality: results from 2  
32 prospective cohort studies. *Archives of internal medicine* 2012;**172**(7):555-63 doi:  
33 10.1001/archinternmed.2011.2287[published Online First: Epub Date]].  
34  
35  
36 33. Estruch R, Ros E, Salas-Salvado J, et al. Primary prevention of cardiovascular disease with a  
37 Mediterranean diet. *N Engl J Med* 2013;**368**(14):1279-90 doi:  
38 10.1056/NEJMoa1200303[published Online First: Epub Date]].  
39  
40  
41 34. Sacks FM, Kass EH. Low blood pressure in vegetarians: effects of specific foods and  
42 nutrients. *Am J Clin Nutr* 1988;**48**(3 Suppl):795-800  
43  
44  
45  
46  
47  
48  
49  
50  
51  
52  
53  
54  
55  
56  
57  
58  
59  
60

- 1  
2  
3  
4 35. Jenkins DJ, Kendall CW, Marchie A, et al. Effects of a dietary portfolio of cholesterol-  
5  
6 lowering foods vs lovastatin on serum lipids and C-reactive protein. JAMA  
7  
8 2003;**290**(4):502-10  
9
- 10 36. Appel LJ, Sacks FM, Carey VJ, et al. Effects of protein, monounsaturated fat, and  
11  
12 carbohydrate intake on blood pressure and serum lipids: results of the OmniHeart  
13  
14 randomized trial. JAMA 2005;**294**(19):2455-64  
15  
16
- 17 37. Gardner CD, Coulston A, Chatterjee L, et al. The effect of a plant-based diet on plasma lipids  
18  
19 in hypercholesterolemic adults: a randomized trial. Ann Intern Med 2005;**142**(9):725-33  
20  
21
- 22 38. Harris JA, Benedict FG. *A biometric study of basal metabolism in man*. Washington, DC:  
23  
24 Carnegie Institute of Washington, 1919 (Publication no. 279.).  
25  
26
- 27 39. Shetty PS, Henry CJ, Black AE, et al. Energy requirements of adults: an update on basal  
28  
29 metabolic rates (BMRs) and physical activity levels (PALs). Eur J Clin Nutr 1996;**50**  
30  
31 **Suppl 1**:S11-23  
32  
33
- 34 40. Pereira MA, Swain J, Goldfine AB, et al. Effects of a low-glycemic load diet on resting  
35  
36 energy expenditure and heart disease risk factors during weight loss. JAMA  
37  
38 2004;**292**(20):2482-90  
39  
40
- 41 41. Ainsworth BE, Haskell WL, Leon AS, et al. Compendium of physical activities:  
42  
43 classification of energy costs of human physical activities. Med Sci Sports Exerc  
44  
45 1993;**25**(1):71-80  
46  
47
- 48 42. Anderson KM, Wilson PW, Odell PM, et al. An updated coronary risk profile. A statement  
49  
50 for health professionals. Circulation 1991;**83**(1):356-62  
51  
52
- 53 43. USDA Nutrient Database for Standard Reference, Release 19. Nutrient Data Laboratory  
54  
55 Home Page: U.S. Department of Agriculture, Agricultural Research Service, 2006.  
56  
57  
58  
59  
60



- 1  
2  
3  
4 44. SAS Institute. SAS/STAT User's Guide (ed 9.2) [program]. Cary, NC: SAS Institute, 2008.  
5  
6 45. Executive Summary of The Third Report of The National Cholesterol Education Program  
7  
8 (NCEP) Expert Panel on Detection, Evaluation, And Treatment of High Blood  
9  
10 Cholesterol In Adults (Adult Treatment Panel III). JAMA 2001;**285**(19):2486-97  
11  
12 46. Grundy SM, Cleeman JI, Merz CN, et al. Implications of recent clinical trials for the  
13  
14 National Cholesterol Education Program Adult Treatment Panel III guidelines.  
15  
16 Circulation 2004;**110**(2):227-39  
17  
18 47. Westman EC, Yancy WS, Edman JS, et al. Effect of 6-month adherence to a very low  
19  
20 carbohydrate diet program. Am J Med 2002;**113**(1):30-6  
21  
22 48. Jenkins DJ, Jones PJ, Lamarche B, et al. Effect of a dietary portfolio of cholesterol-lowering  
23  
24 foods given at 2 levels of intensity of dietary advice on serum lipids in hyperlipidemia: a  
25  
26 randomized controlled trial. JAMA 2011;**306**(8):831-9 doi:  
27  
28 10.1001/jama.2011.1202[published Online First: Epub Date].  
29  
30 49. Gotto AM, Jr., Whitney E, Stein EA, et al. Relation between baseline and on-treatment lipid  
31  
32 parameters and first acute major coronary events in the Air Force/Texas Coronary  
33  
34 Atherosclerosis Prevention Study (AFCAPS/TexCAPS). Circulation 2000;**101**(5):477-84  
35  
36 50. Sniderman AD, Furberg CD, Keech A, et al. Apolipoproteins versus lipids as indices of  
37  
38 coronary risk and as targets for statin treatment. Lancet 2003;**361**(9359):777-80  
39  
40 51. Yusuf S, Hawken S, Ounpuu S, et al. Effect of potentially modifiable risk factors associated  
41  
42 with myocardial infarction in 52 countries (the INTERHEART study): case-control  
43  
44 study. Lancet 2004;**364**(9438):937-52  
45  
46  
47  
48  
49  
50  
51  
52  
53  
54  
55  
56  
57  
58  
59  
60

- 1  
2  
3  
4  
5  
6  
7  
8  
9  
10  
11  
12  
13  
14  
15  
16  
17  
18  
19  
20  
21  
22  
23  
24  
25  
26  
27  
28  
29  
30  
31  
32  
33  
34  
35  
36  
37  
38  
39  
40  
41  
42  
43  
44  
45  
46  
47  
48  
49  
50  
51  
52  
53  
54  
55  
56  
57  
58  
59  
60
52. McQueen MJ, Hawken S, Wang X, et al. Lipids, lipoproteins, and apolipoproteins as risk factors of myocardial infarction in 52 countries (the INTERHEART study): a case-control study. *Lancet* 2008;**372**:224-33
53. Contois JH, McConnell JP, Sethi AA, et al. Apolipoprotein B and cardiovascular disease risk: position statement from the AACC Lipoproteins and Vascular Diseases Division Working Group on Best Practices. *Clin Chem* 2009;**55**(3):407-19 doi: 10.1373/clinchem.2008.118356[published Online First: Epub Date]].
54. Sniderman AD, Williams K, Contois JH, et al. A meta-analysis of low-density lipoprotein cholesterol, non-high-density lipoprotein cholesterol, and apolipoprotein B as markers of cardiovascular risk. *Circ Cardiovasc Qual Outcomes* 2011;**4**(3):337-45 doi: 10.1161/CIRCOUTCOMES.110.959247[published Online First: Epub Date]].
55. Liu S, Manson JE, Buring JE, et al. Relation between a diet with a high glycemic load and plasma concentrations of high-sensitivity C-reactive protein in middle-aged women. *Am J Clin Nutr* 2002;**75**(3):492-8
56. Wolever TM, Gibbs AL, Mehling C, et al. The Canadian Trial of Carbohydrates in Diabetes (CCD), a 1-y controlled trial of low-glycemic-index dietary carbohydrate in type 2 diabetes: no effect on glycated hemoglobin but reduction in C-reactive protein. *Am J Clin Nutr* 2008;**87**(1):114-25
57. Sabate J, Fraser GE, Burke K, et al. Effects of walnuts on serum lipid levels and blood pressure in normal men. *N Engl J Med* 1993;**328**(9):603-7
58. Jenkins DJ, Kendall CW, Marchie A, et al. Dose response of almonds on coronary heart disease risk factors: blood lipids, oxidized low-density lipoproteins, lipoprotein(a),

1  
2  
3 homocysteine, and pulmonary nitric oxide: a randomized, controlled, crossover trial.

4  
5  
6 Circulation 2002;**106**(11):1327-32

- 7  
8 59. Mozaffarian D, Hao T, Rimm EB, et al. Changes in diet and lifestyle and long-term weight  
9 gain in women and men. The New England journal of medicine 2011;**364**(25):2392-404  
10  
11 doi: 10.1056/NEJMoa1014296[published Online First: Epub Date]].  
12  
13  
14  
15  
16  
17  
18  
19  
20  
21  
22  
23  
24  
25  
26  
27  
28  
29  
30  
31  
32  
33  
34  
35  
36  
37  
38  
39  
40  
41  
42  
43  
44  
45  
46  
47  
48  
49  
50  
51  
52  
53  
54  
55  
56  
57  
58  
59  
60

For peer review only

## Figure Legends

Figure 1: Patient Flow Diagram.

Figure 2: Weight loss during the study on both diets.

Figure 3: Mean (A) LDL-C, (B) HDL-C, (C) TC:HDL-C, (D) apolipoprotein B (apoB) and (E) apolipoprotein A1 (apoA1), (F) ApoB:ApoA1 ratio between the two treatments during the metabolic and ad libitum phases.

**Table 1: Baseline Characteristics for Those Who Started the 6-Month Self-Selected Diets (n=39)**

|                                          | High-carbohydrate (n=19) | Low-Carbohydrate (n=20) |
|------------------------------------------|--------------------------|-------------------------|
| Age (y)                                  | 55.3 ± 1.8               | 57.6 ± 1.4              |
| Males/Females                            | 6/13                     | 9/11                    |
| Body Weight, kg                          | 85.4 [79.3, 91.6]        | 83.7 [78.5, 89.0]       |
| Body Mass Index, kg/m <sup>2</sup>       | 31.1 [29.9, 32.4]        | 31.1 [29.8, 32.4]       |
| Blood Pressure, mm Hg                    |                          |                         |
| Systolic                                 | 122 [116, 128]           | 128 [123, 132]          |
| Diastolic                                | 75 [72, 79]              | 77 [74, 80]             |
| Cholesterol, mmol/L                      |                          |                         |
| Total                                    | 6.75 [6.28, 7.21]        | 6.76 [6.21, 7.31]       |
| LDL-C                                    | 4.40 [3.99, 4.82]        | 4.53 [4.14, 4.93]       |
| HDL-C                                    | 1.36 [1.22, 1.50]        | 1.21 [1.06, 1.36]       |
| Triglycerides, mmol/L                    | 2.16 [1.62, 2.70]        | 2.23 [1.65, 2.80]       |
| Ratios                                   |                          |                         |
| TC:HDL-C                                 | 5.17 [4.54, 5.80]        | 5.81 [5.20, 6.41]       |
| LDL-C: HDL-C                             | 3.35 [2.95, 3.75]        | 3.89 [3.49, 4.29]       |
| Medications                              |                          |                         |
| Lipid lowering (prior to start of study) | 4                        | 7                       |
| Blood pressure                           | 3                        | 6                       |
| Diabetes                                 | 0                        | 0                       |
| Thyroid                                  | 2                        | 1                       |

Values represent mean ± SEM or 95% confidence intervals (CIs).

No significant differences between treatments at baseline assessed by two sample t-test (two-tailed).

**Table 2: Nutritional Profiles on the High and Low Carbohydrate Diets (n=39)**

|                                                                                                                                                                                                                                                                                                                                           | High Carbohydrate   |                         | Low Carbohydrate    |                         | Between-Treatment Difference <sup>c</sup> | P-value <sup>d</sup> |
|-------------------------------------------------------------------------------------------------------------------------------------------------------------------------------------------------------------------------------------------------------------------------------------------------------------------------------------------|---------------------|-------------------------|---------------------|-------------------------|-------------------------------------------|----------------------|
|                                                                                                                                                                                                                                                                                                                                           | Week 0 <sup>b</sup> | Ad Libitum <sup>b</sup> | Week 0 <sup>b</sup> | Ad Libitum <sup>b</sup> |                                           |                      |
| Calories (kcal)                                                                                                                                                                                                                                                                                                                           | 1598 [1421, 1775]   | 1347 [1140, 1553]       | 1840 [1550, 2130]   | 1388 [1234, 1541]       | -248 [-391, -106]                         | 0.001                |
| % of Total Calories                                                                                                                                                                                                                                                                                                                       |                     |                         |                     |                         |                                           |                      |
| Available Carbohydrate                                                                                                                                                                                                                                                                                                                    | 46.3 [42.2, 50.4]   | 53.9 [50.2, 57.5]       | 43.8 [40.2, 47.4]   | 39.6 [35.7, 43.6]       | -10.5 [-13.6, -7.5]                       | < 0.001              |
| Protein                                                                                                                                                                                                                                                                                                                                   | 20.6 [18.7, 22.5]   | 18.4 [17.4, 19.5]       | 20.1 [18.0, 22.2]   | 22.7 [20.1, 25.4]       | 5.9 [4.3, 7.5]                            | < 0.001              |
| Vegetable Protein                                                                                                                                                                                                                                                                                                                         | 5.6 [5.0, 6.1]      | 6.7 [6.1, 7.3]          | 5.7 [5.3, 6.1]      | 15.0 [11.7, 18.2]       | 8.2 [6.5, 9.9]                            | < 0.001              |
| Soy Protein                                                                                                                                                                                                                                                                                                                               | 0 [0, 0]            | 0.2 [0.1, 0.2]          | 0 [0, 0]            | 4.7 [2.7, 6.8]          | 3.6 [2.9, 4.4]                            | < 0.001              |
| Fat                                                                                                                                                                                                                                                                                                                                       | 30.8 [27.3, 34.4]   | 27.5 [24.6, 30.4]       | 34.4 [31.4, 37.5]   | 36.0 [31.5, 40.5]       | 5.2 [2.6, 7.7]                            | < 0.001              |
| Saturated                                                                                                                                                                                                                                                                                                                                 | 10.8 [9.1, 12.6]    | 7.6 [6.2, 8.9]          | 11.8 [10.3, 13.3]   | 7.5 [6.6, 8.4]          | -0.4 [-1.4, 0.6]                          | 0.401                |
| Monounsaturated                                                                                                                                                                                                                                                                                                                           | 12.3 [10.7, 13.8]   | 10.4 [9.3, 11.6]        | 13.0 [11.9, 14.2]   | 14.8 [13.1, 16.6]       | 4.6 [3.1, 6.1]                            | < 0.001              |
| Polyunsaturated*                                                                                                                                                                                                                                                                                                                          | 5.2 [4.6, 5.8]      | 6.3 [5.4, 7.2]          | 6.6 [5.5, 7.8]      | 8.4 [7.5, 9.4]          | 0.4 [-0.5, 1.4]                           | 0.4                  |
| Alcohol                                                                                                                                                                                                                                                                                                                                   | 2.2 [0.3, 4.2]      | 1.9 [0.7, 3.2]          | 1.6 [0.0, 3.3]      | 1.1 [0.1, 2.1]          | -0.5 [-1.3, 0.2]                          | 0.160                |
| Dietary Fibre (g/1000 kcal)                                                                                                                                                                                                                                                                                                               | 10.9 [9.2, 12.5]    | 18.2 [15.2, 21.1]       | 12.1 [9.9, 14.4]    | 21.3 [18.8, 23.8]       | 1.5 [-0.5, 3.5]                           | 0.127                |
| Dietary Cholesterol (mg/1000 kcal)                                                                                                                                                                                                                                                                                                        | 149 [129, 169]      | 87 [61, 113]            | 157 [136, 177]      | 117 [44, 189]           | 11 [-22, 23]                              | 0.954                |
| Adherence with "Eco-Atkins" Components <sup>a</sup>                                                                                                                                                                                                                                                                                       |                     |                         |                     |                         |                                           |                      |
| Viscous Fiber (out of 33.3%)                                                                                                                                                                                                                                                                                                              | ---                 | ---                     | ---                 | 14.0 [9.4, 18.6]        | ---                                       | ---                  |
| Vegetable Protein (soy and gluten) (out of 33.3%)                                                                                                                                                                                                                                                                                         | ---                 | ---                     | ---                 | 14.7 [10.3, 19.1]       | ---                                       | ---                  |
| Nuts (out of 33.3%)                                                                                                                                                                                                                                                                                                                       | ---                 | ---                     | ---                 | 6.3 [3.3, 9.3]          | ---                                       | ---                  |
| Total Adherence (out of 100%)                                                                                                                                                                                                                                                                                                             | ---                 | ---                     | ---                 | 33.6 [22.1, 45.2]       | ---                                       | ---                  |
| Values represent mean ± 95% confidence intervals (CIs).                                                                                                                                                                                                                                                                                   |                     |                         |                     |                         |                                           |                      |
| <sup>a</sup> Adherence represents the mean percentage intake of the prescribed intake of the 3 cholesterol-lowering components [viscous fiber, vegetable protein (soy and gluten), nuts] by expressing the recorded intake for each component as 33.3%. The sum of the 3 components if consumed as prescribed would equal 100% adherence. |                     |                         |                     |                         |                                           |                      |
| <sup>b</sup> Values represent multiple imputation (taking the mean of 5 sets of randomly imputed values) to generate data for those who dropped out or had missing values.                                                                                                                                                                |                     |                         |                     |                         |                                           |                      |
| <sup>c</sup> Between Treatment Difference = Change from baseline between the two diets using all available data.                                                                                                                                                                                                                          |                     |                         |                     |                         |                                           |                      |
| <sup>d</sup> P-values assessed using all available data and a repeated measures mixed model accounting for time of assessment. The response variable was change from baseline, with diet and week as fixed effects and subject ID nested in diet. There was no adjustment for baseline.                                                   |                     |                         |                     |                         |                                           |                      |
| *Significantly different between treatments at baseline assessed by two sample t-test (two tailed), P=0.025.                                                                                                                                                                                                                              |                     |                         |                     |                         |                                           |                      |

Table 3: Effect of high and low carbohydrate diets on body weight, blood lipids, apolipoproteins and 10-yr CHD risk (n=39)

|                                   | High Carbohydrate   |                         | Low Carbohydrate    |                         | Between Treatment Difference <sup>b</sup> | P-value <sup>c</sup> |
|-----------------------------------|---------------------|-------------------------|---------------------|-------------------------|-------------------------------------------|----------------------|
|                                   | Week 0 <sup>a</sup> | Ad Libitum <sup>a</sup> | Week 0 <sup>a</sup> | Ad Libitum <sup>a</sup> |                                           |                      |
| Body Weight, kg                   | 85.4 [79.3, 91.6]   | 80.4 [74.2, 86.6]       | 83.7 [78.5, 89.0]   | 76.9 [71.9, 81.9]       | -1.1 [-2.1, 0.0]                          | 0.047                |
| BMI                               | 31.1 [29.9, 32.4]   | 29.2 [27.9, 30.5]       | 31.1 [29.8, 32.4]   | 28.7 [27.3, 30.1]       | -0.4 [-0.8, 0.0]                          | 0.039                |
| Body Fat, %                       | 38.9 [34.0, 43.8]   | 35.0 [30.7, 39.2]       | 35.6 [30.1, 41.1]   | 31.4 [26.1, 36.6]       | -1.7 [-4.0, 0.7]                          | 0.161                |
| Waist Circumference (cm)          | 102.8 [99.4, 106.2] | 97.4 [93.1, 101.6]      | 99.8 [96.1, 103.5]  | 93.7 [89.8, 97.7]       | 0.1 [-1.1, 1.3]                           | 0.861                |
| Fasting Glucose                   | 5.2 [4.9, 5.4]      | 4.6 [4.5, 4.7]          | 5.2 [5.0, 5.4]      | 4.6 [4.4, 4.9]          | 0.1 [-0.1, 0.2]                           | 0.447                |
| HbA1c (%)                         | 5.2 [5.0, 5.4]      | 5.2 [5.0, 5.3]          | 5.3 [5.0, 5.5]      | 5.2 [5.0, 5.4]          | 0.0 [-0.2, 0.1]                           | 0.852                |
| Fasting Insulin                   | 50.0 [38.3, 61.7]   | 36.4 [27.5, 45.4]       | 47.3 [36.9, 57.6]   | 33.3 [22.8, 43.9]       | -0.6 [-9.1, 8.0]                          | 0.898                |
| HOMA-IR                           | 1.65 [1.17, 2.13]   | 1.11 [0.81, 1.41]       | 1.53 [1.19, 1.88]   | 0.99 [0.68, 1.30]       | 0.01 [-0.30, 0.33]                        | 0.937                |
| Satiety (-4 to 4)                 | 1.0 [0.7, 1.4]      | 0.9 [0.7, 1.2]          | 1.2 [0.8, 1.7]      | 1.1 [0.8, 1.4]          | -0.1 [-0.4, 0.2]                          | 0.440                |
| Exercise, METs                    | 17.4 [12.4, 22.4]   | 25.8 [21.1, 30.6]       | 24.0 [12.9, 35.0]   | 23.9 [15.3, 32.6]       | -9.3 [-16.4, -2.2]                        | 0.012                |
| Cholesterol, mmol/L <sup>†</sup>  |                     |                         |                     |                         |                                           |                      |
| Total                             | 6.75 [6.28, 7.21]   | 6.49 [5.97, 7.02]       | 6.76 [6.21, 7.31]   | 6.10 [5.67, 6.53]       | -0.62 [-0.86, -0.37]                      | <0.001               |
| LDL-C                             | 4.40 [3.99, 4.82]   | 4.40 [3.91, 4.90]       | 4.53 [4.14, 4.93]   | 4.06 [3.71, 4.42]       | -0.49 [-0.70, -0.28]                      | <0.001               |
| HDL-C                             | 1.36 [1.22, 1.50]   | 1.35 [1.22, 1.48]       | 1.21 [1.06, 1.36]   | 1.25 [1.10, 1.39]       | 0.03 [-0.02, 0.07]                        | 0.245                |
| Triglycerides                     | 2.16 [1.62, 2.70]   | 1.71 [1.35, 2.07]       | 2.23 [1.65, 2.80]   | 1.50 [1.22, 1.77]       | -0.34 [-0.57, -0.11]                      | 0.005                |
| Ratios                            |                     |                         |                     |                         |                                           |                      |
| Tchol:HDL-C                       | 5.17 [4.54, 5.80]   | 4.92 [4.49, 5.34]       | 5.81 [5.20, 6.41]   | 5.13 [4.65, 5.62]       | -0.57 [-0.83, -0.32]                      | <0.001               |
| LDL-C:HDL-C                       | 3.35 [2.95, 3.75]   | 3.34 [3.00, 3.68]       | 3.89 [3.49, 4.29]   | 3.48 [3.06, 3.90]       | -0.42 [-0.60, -0.24]                      | <0.002               |
| Apolipoproteins, g/L <sup>‡</sup> |                     |                         |                     |                         |                                           |                      |
| Apo A1                            | 1.69 [1.60, 1.78]   | 1.69 [1.60, 1.77]       | 1.57 [1.45, 1.69]   | 1.57 [1.46, 1.67]       | -0.02 [-0.06, 0.02]                       | 0.316                |
| Apo B                             | 1.38 [1.26, 1.50]   | 1.23 [1.13, 1.33]       | 1.42 [1.30, 1.54]   | 1.20 [1.10, 1.31]       | -0.11 [-0.16, -0.06]                      | <0.001               |
| Apo B: Apo A1                     | 0.83 [0.74, 0.91]   | 0.74 [0.68, 0.80]       | 0.92 [0.84, 0.99]   | 0.78 [0.70, 0.86]       | -0.05 [-0.09, -0.02]                      | 0.003                |
| hs-CRP, mg/dL                     | 2.1 [1.0, 3.3]      | 1.9 [1.3, 2.4]          | 3.0 [1.5, 4.5]      | 2.6 [1.0, 4.1]          | -0.4 [-0.9, 0.1]                          | 0.082                |
| Blood Pressure, mmHg              |                     |                         |                     |                         |                                           |                      |
| Systolic                          | 122 [116, 128]      | 118 [114, 122]          | 128 [123, 132]      | 123 [119, 128]          | -2 [-5, 2]                                | 0.356                |
| Diastolic                         | 75 [72, 79]         | 74 [71, 77]             | 77 [74, 80]         | 76 [71, 80]             | -1 [-3, 1]                                | 0.288                |
| 10-yr CHD risk (%)*               | 8 [6, 9]            | 7 [6, 9]                | 12 [9, 14]          | 9 [7, 11]               | -2 [-2, -1]                               | <0.001               |

1  
2  
3  
4 Values represent mean  $\pm$  95% confidence intervals (CIs).

5 †To convert total cholesterol, LDL-C, and HDL-C to mg/dL, divide by 0.0259; to convert triglycerides to mg/dL, divide by 0.0113.

6 ‡To convert apolipoprotein A1 and B to mg/dL, multiply by 100.  
7  
8

9 <sup>a</sup>Values represent multiple imputation (taking the mean of 5 sets of randomly imputed values) to generate data for those who dropped out or had missing values.

10 <sup>b</sup>Between Treatment Difference = Change from baseline between the two diets using all available data.

11 <sup>c</sup>P-values assessed using all available data and a repeated measures mixed model accounting for time of assessment. The response variable was change from baseline,  
12 with diet and week as fixed effects and subject ID nested in diet. There was no adjustment for baseline.

13 \*Significantly different between treatments at baseline assessed by two sample t-test (two tailed), P=0.007.  
14  
15  
16  
17  
18  
19  
20  
21  
22  
23  
24  
25  
26  
27  
28  
29  
30  
31  
32  
33  
34  
35  
36  
37  
38  
39  
40  
41  
42  
43  
44  
45  
46  
47  
48  
49



Figure 1

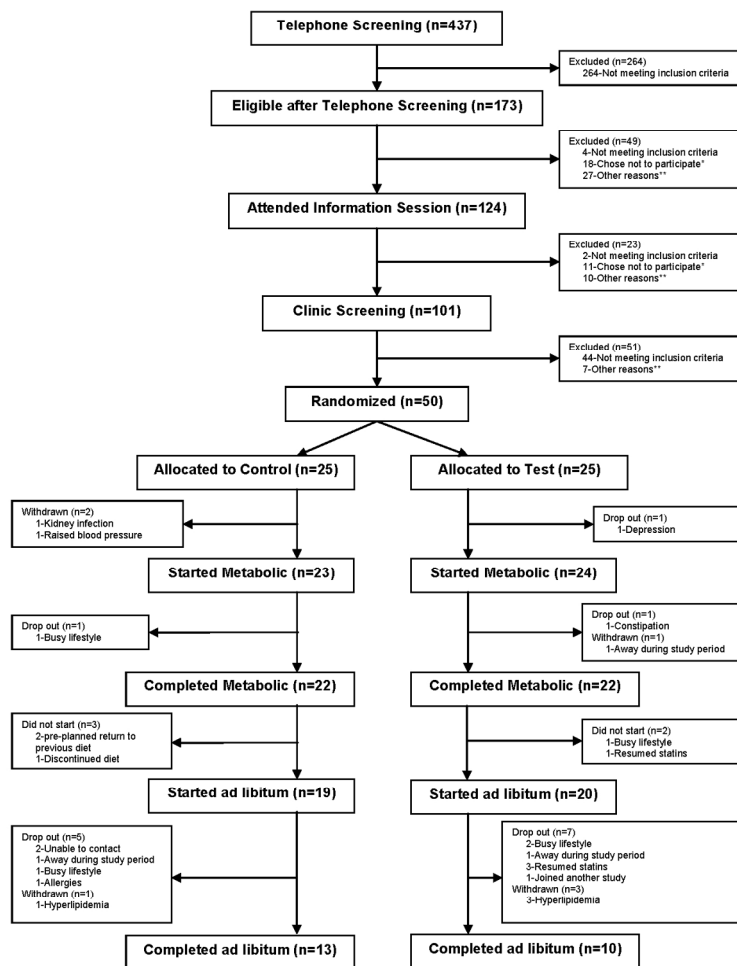

\*Chose not to participate (29): busy lifestyle (13), not interested (6), study too demanding (3), currently on another diet (2), no compensation (2), work-related (2), dislike prepackaged foods (1)

\*\*Other reasons (44): unable to contact (19), unable to come to clinic (13), away (5), throat surgery (1), bowel resection (1), high potassium and BP (1), high potassium (1), raised liver function tests (1), not interested (1), medical insurance issue (1)

215x279mm (200 x 200 DPI)



1  
2  
3  
4  
5  
6  
7  
8  
9  
10  
11  
12  
13  
14  
15  
16  
17  
18  
19  
20  
21  
22  
23  
24  
25  
26  
27  
28  
29  
30  
31  
32  
33  
34  
35  
36  
37  
38  
39  
40  
41  
42  
43  
44  
45  
46  
47  
48  
49  
50  
51  
52  
53  
54  
55  
56  
57  
58  
59  
60

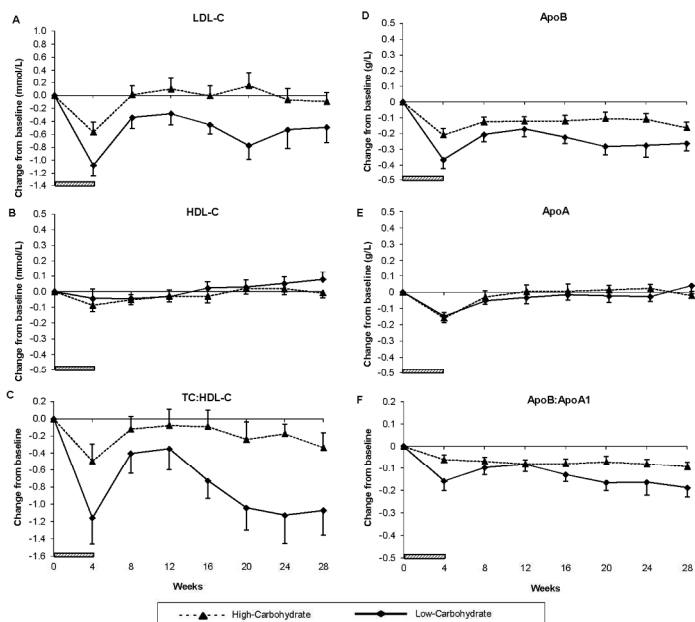

Figure 3. Change in (A) LDL-C, (B) HDL-C, (C) TC:HDL-C, (D) Apolipoprotein B (apoB), (E) Apolipoprotein A1 (apoA1), (F) ApoB:ApoA1 ratio between the two treatments during the metabolic phase and the ad libitum phase. Values represent mean  $\pm$  SEM of the change from baseline using multiple imputation (taking the mean of 5 sets of randomly imputed values) to generate data for those who dropped out or had missing values for the ad libitum phase. Significant treatment differences were seen for LDL-C (P<0.001), apo B (P<0.001) and the ratios TC:HDL-C (P<0.001) and apoB:apoA1 (p=0.003) using all available data in the repeated measures mixed model analysis during the ad libitum phase.

■ Represents the metabolic phase.

279x215mm (200 x 200 DPI)

Review only

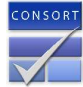

## CONSORT 2010 checklist of information to include when reporting a randomised trial\*

| Section/Topic             | Item No | Checklist item                                                                                                                        | Reported on page No                                           |
|---------------------------|---------|---------------------------------------------------------------------------------------------------------------------------------------|---------------------------------------------------------------|
| <b>Title and abstract</b> |         |                                                                                                                                       |                                                               |
|                           | 1a      | Identification as a randomised trial in the title                                                                                     | 1                                                             |
|                           | 1b      | Structured summary of trial design, methods, results, and conclusions (for specific guidance see CONSORT for abstracts)               | 5-6                                                           |
| <b>Introduction</b>       |         |                                                                                                                                       |                                                               |
| Background and objectives | 2a      | Scientific background and explanation of rationale                                                                                    | 7-8                                                           |
|                           | 2b      | Specific objectives or hypotheses                                                                                                     | 8                                                             |
| <b>Methods</b>            |         |                                                                                                                                       |                                                               |
| Trial design              | 3a      | Description of trial design (such as parallel, factorial) including allocation ratio                                                  | 9                                                             |
|                           | 3b      | Important changes to methods after trial commencement (such as eligibility criteria), with reasons                                    | NA                                                            |
| Participants              | 4a      | Eligibility criteria for participants                                                                                                 | 8, also previously published from results of metabolic phase  |
|                           | 4b      | Settings and locations where the data were collected                                                                                  | 8                                                             |
| Interventions             | 5       | The interventions for each group with sufficient details to allow replication, including how and when they were actually administered | 9-11                                                          |
| Outcomes                  | 6a      | Completely defined pre-specified primary and secondary outcome measures, including how and when they were assessed                    | 10-12                                                         |
|                           | 6b      | Any changes to trial outcomes after the trial commenced, with reasons                                                                 | NA                                                            |
| Sample size               | 7a      | How sample size was determined                                                                                                        | Continuation with ad libitum phase, metabolic phase published |

1  
2  
3  
4  
5  
6  
7  
8  
9  
10  
11  
12  
13  
14  
15  
16  
17  
18  
19  
20  
21  
22  
23  
24  
25  
26  
27  
28  
29  
30  
31  
32  
33  
34  
35  
36  
37  
38  
39  
40  
41  
42  
43  
44  
45  
46  
47  
48  
49

Randomisation:  
Sequence  
generation

7b When applicable, explanation of any interim analyses and stopping guidelines

NA

8a Method used to generate the random allocation sequence

Continuation  
with ad libitum  
phase,  
randomized  
metabolic  
phase  
published

8b Type of randomisation; details of any restriction (such as blocking and block size)

Continuation  
with ad libitum  
phase,  
randomized  
metabolic  
phase  
published

Allocation  
concealment  
mechanism

9 Mechanism used to implement the random allocation sequence (such as sequentially numbered containers), describing any steps taken to conceal the sequence until interventions were assigned

Continuation  
with ad libitum  
phase,  
randomized  
metabolic  
phase  
published

Implementation

10 Who generated the random allocation sequence, who enrolled participants, and who assigned participants to interventions

Continuation  
with ad libitum  
phase,  
randomized  
metabolic  
phase  
published

Blinding

11a If done, who was blinded after assignment to interventions (for example, participants, care providers, those assessing outcomes) and how

11a

11b If relevant, description of the similarity of interventions

NA

|    |                                                      |     |                                                                                                                                                   |                                                                                                                                                                                 |
|----|------------------------------------------------------|-----|---------------------------------------------------------------------------------------------------------------------------------------------------|---------------------------------------------------------------------------------------------------------------------------------------------------------------------------------|
| 1  |                                                      |     |                                                                                                                                                   |                                                                                                                                                                                 |
| 2  | Statistical methods                                  | 12a | Statistical methods used to compare groups for primary and secondary outcomes                                                                     | <del>12</del>                                                                                                                                                                   |
| 3  |                                                      | 12b | Methods for additional analyses, such as subgroup analyses and adjusted analyses                                                                  | <del>12</del>                                                                                                                                                                   |
| 4  |                                                      |     |                                                                                                                                                   |                                                                                                                                                                                 |
| 5  | <b>Results</b>                                       |     |                                                                                                                                                   |                                                                                                                                                                                 |
| 6  | Participant flow (a diagram is strongly recommended) | 13a | For each group, the numbers of participants who were randomly assigned, received intended treatment, and were analysed for the primary outcome    | Figure 1, CONSORT Diagram                                                                                                                                                       |
| 7  |                                                      | 13b | For each group, losses and exclusions after randomisation, together with reasons                                                                  | Figure 1, CONSORT Diagram                                                                                                                                                       |
| 8  |                                                      |     |                                                                                                                                                   |                                                                                                                                                                                 |
| 9  | Recruitment                                          | 14a | Dates defining the periods of recruitment and follow-up                                                                                           | 8                                                                                                                                                                               |
| 10 |                                                      | 14b | Why the trial ended or was stopped                                                                                                                | NA                                                                                                                                                                              |
| 11 |                                                      |     |                                                                                                                                                   |                                                                                                                                                                                 |
| 12 | Baseline data                                        | 15  | A table showing baseline demographic and clinical characteristics for each group                                                                  | Table 1                                                                                                                                                                         |
| 13 | Numbers analysed                                     | 16  | For each group, number of participants (denominator) included in each analysis and whether the analysis was by original assigned groups           | <del>12</del>                                                                                                                                                                   |
| 14 |                                                      | 17a | For each primary and secondary outcome, results for each group, and the estimated effect size and its precision (such as 95% confidence interval) | <del>132-153</del> , Table 3, Figure 2 & 3                                                                                                                                      |
| 15 | Outcomes and estimation                              | 17b | For binary outcomes, presentation of both absolute and relative effect sizes is recommended                                                       | Relative effect sizes are given in Results <del>132-153</del> and Tables 2 & 3. The absolute differences from each treatment can be derived from Table 2 & 3 and Figures 2 & 3. |
| 16 |                                                      | 18  | Results of any other analyses performed, including subgroup analyses and adjusted analyses, distinguishing pre-specified from exploratory         | <del>13-152, 13</del>                                                                                                                                                           |
| 17 |                                                      |     |                                                                                                                                                   |                                                                                                                                                                                 |
| 18 | Ancillary analyses                                   | 18  | Results of any other analyses performed, including subgroup analyses and adjusted analyses, distinguishing pre-specified from exploratory         | <del>13-152, 13</del>                                                                                                                                                           |
| 19 |                                                      |     |                                                                                                                                                   |                                                                                                                                                                                 |
| 20 |                                                      |     |                                                                                                                                                   |                                                                                                                                                                                 |
| 21 |                                                      |     |                                                                                                                                                   |                                                                                                                                                                                 |
| 22 |                                                      |     |                                                                                                                                                   |                                                                                                                                                                                 |
| 23 |                                                      |     |                                                                                                                                                   |                                                                                                                                                                                 |
| 24 |                                                      |     |                                                                                                                                                   |                                                                                                                                                                                 |
| 25 |                                                      |     |                                                                                                                                                   |                                                                                                                                                                                 |
| 26 |                                                      |     |                                                                                                                                                   |                                                                                                                                                                                 |
| 27 |                                                      |     |                                                                                                                                                   |                                                                                                                                                                                 |
| 28 |                                                      |     |                                                                                                                                                   |                                                                                                                                                                                 |
| 29 |                                                      |     |                                                                                                                                                   |                                                                                                                                                                                 |
| 30 |                                                      |     |                                                                                                                                                   |                                                                                                                                                                                 |
| 31 |                                                      |     |                                                                                                                                                   |                                                                                                                                                                                 |
| 32 |                                                      |     |                                                                                                                                                   |                                                                                                                                                                                 |
| 33 |                                                      |     |                                                                                                                                                   |                                                                                                                                                                                 |
| 34 |                                                      |     |                                                                                                                                                   |                                                                                                                                                                                 |
| 35 |                                                      |     |                                                                                                                                                   |                                                                                                                                                                                 |
| 36 |                                                      |     |                                                                                                                                                   |                                                                                                                                                                                 |
| 37 |                                                      |     |                                                                                                                                                   |                                                                                                                                                                                 |
| 38 |                                                      |     |                                                                                                                                                   |                                                                                                                                                                                 |
| 39 |                                                      |     |                                                                                                                                                   |                                                                                                                                                                                 |
| 40 |                                                      |     |                                                                                                                                                   |                                                                                                                                                                                 |
| 41 |                                                      |     |                                                                                                                                                   |                                                                                                                                                                                 |
| 42 |                                                      |     |                                                                                                                                                   |                                                                                                                                                                                 |
| 43 |                                                      |     |                                                                                                                                                   |                                                                                                                                                                                 |

1  
2  
3  
4  
5  
6  
7  
8  
9  
10  
11  
12  
13  
14  
15  
16  
17  
18  
19  
20  
21  
22  
23  
24  
25  
26  
27  
28  
29  
30  
31  
32  
33  
34  
35  
36  
37  
38  
39  
40  
41  
42  
43  
44  
45  
46  
47  
48  
49

|                          |    |                                                                                                                  |                                  |
|--------------------------|----|------------------------------------------------------------------------------------------------------------------|----------------------------------|
| Harms                    | 19 | All important harms or unintended effects in each group (for specific guidance see CONSORT for harms)            | <u>154</u>                       |
| <b>Discussion</b>        |    |                                                                                                                  |                                  |
| Limitations              | 20 | Trial limitations, addressing sources of potential bias, imprecision, and, if relevant, multiplicity of analyses | <u>186</u>                       |
| Generalisability         | 21 | Generalisability (external validity, applicability) of the trial findings                                        | <u>15-194,15</u>                 |
| Interpretation           | 22 | Interpretation consistent with results, balancing benefits and harms, and considering other relevant evidence    | <u>145-1946</u>                  |
| <b>Other information</b> |    |                                                                                                                  |                                  |
| Registration             | 23 | Registration number and name of trial registry                                                                   | <u>2</u>                         |
| Protocol                 | 24 | Where the full trial protocol can be accessed, if available                                                      | <u>2</u>                         |
| Funding                  | 25 | Sources of funding and other support (such as supply of drugs), role of funders                                  | <u>2-3, (repeated<br/>18) 20</u> |

\*We strongly recommend reading this statement in conjunction with the CONSORT 2010 Explanation and Elaboration for important clarifications on all the items. If relevant, we also recommend reading CONSORT extensions for cluster randomised trials, non-inferiority and equivalence trials, non-pharmacological treatments, herbal interventions, and pragmatic trials. Additional extensions are forthcoming: for those and for up to date references relevant to this checklist, see [www.consort-statement.org](http://www.consort-statement.org).



**Effect of a Six Months Vegan Low-Carbohydrate (“Eco-Atkins”) Diet on Cardiovascular Risk Factors and Body Weight in Hyperlipidemic Adults: A Randomized Controlled Trial**

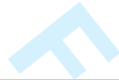

|                                 |                                                                                                                                                                                                                                                                                                                                                                                                                                                                                                                                                                                                                                                                                                                                                                                                                                                                                                                                                                                                                                                                                                                                                                                                                                                                                                           |
|---------------------------------|-----------------------------------------------------------------------------------------------------------------------------------------------------------------------------------------------------------------------------------------------------------------------------------------------------------------------------------------------------------------------------------------------------------------------------------------------------------------------------------------------------------------------------------------------------------------------------------------------------------------------------------------------------------------------------------------------------------------------------------------------------------------------------------------------------------------------------------------------------------------------------------------------------------------------------------------------------------------------------------------------------------------------------------------------------------------------------------------------------------------------------------------------------------------------------------------------------------------------------------------------------------------------------------------------------------|
| Journal:                        | <i>BMJ Open</i>                                                                                                                                                                                                                                                                                                                                                                                                                                                                                                                                                                                                                                                                                                                                                                                                                                                                                                                                                                                                                                                                                                                                                                                                                                                                                           |
| Manuscript ID:                  | bmjopen-2013-003505.R2                                                                                                                                                                                                                                                                                                                                                                                                                                                                                                                                                                                                                                                                                                                                                                                                                                                                                                                                                                                                                                                                                                                                                                                                                                                                                    |
| Article Type:                   | Research                                                                                                                                                                                                                                                                                                                                                                                                                                                                                                                                                                                                                                                                                                                                                                                                                                                                                                                                                                                                                                                                                                                                                                                                                                                                                                  |
| Date Submitted by the Author:   | 17-Dec-2013                                                                                                                                                                                                                                                                                                                                                                                                                                                                                                                                                                                                                                                                                                                                                                                                                                                                                                                                                                                                                                                                                                                                                                                                                                                                                               |
| Complete List of Authors:       | Jenkins, David; University of Toronto, Nutritional Sciences; St. Michael's Hospital, Clinical Nutrition & Risk Factor Modification Center<br>Wong, Julia; University of Toronto, Nutritional Sciences; St. Michael's Hospital, Clinical Nutrition & Risk Factor Modification Center<br>Kendall, Cyril; University of Toronto, Nutritional Sciences; St. Michael's Hospital, Clinical Nutrition & Risk Factor Modification Center<br>Esfahani, Amin; University of Toronto, Nutritional Sciences; St. Michael's Hospital, Clinical Nutrition & Risk Factor Modification Center<br>Ng, Vivian; University of Toronto, Nutritional Sciences; St. Michael's Hospital, Clinical Nutrition & Risk Factor Modification Center<br>Leong, Tracy; University of Toronto, Nutritional Sciences; St. Michael's Hospital, Clinical Nutrition & Risk Factor Modification Center<br>Faulkner, Dorothea; University of Toronto, Nutritional Sciences; St. Michael's Hospital, Clinical Nutrition & Risk Factor Modification Center<br>Vidgen, Ed; University of Toronto, Nutritional Sciences; St. Michael's Hospital, Clinical Nutrition & Risk Factor Modification Center<br>Paul, Gregory; Solae LLC,<br>Mukherjea, Ratna; Solae LLC,<br>Krul, Elaine; Solae LLC,<br>Singer, William; St. Michael's Hospital, Medicine |
| <b>Primary Subject Heading</b>: | Nutrition and metabolism                                                                                                                                                                                                                                                                                                                                                                                                                                                                                                                                                                                                                                                                                                                                                                                                                                                                                                                                                                                                                                                                                                                                                                                                                                                                                  |
| Secondary Subject Heading:      | Cardiovascular medicine                                                                                                                                                                                                                                                                                                                                                                                                                                                                                                                                                                                                                                                                                                                                                                                                                                                                                                                                                                                                                                                                                                                                                                                                                                                                                   |
| Keywords:                       | weight loss, diet, hyperlipidemia                                                                                                                                                                                                                                                                                                                                                                                                                                                                                                                                                                                                                                                                                                                                                                                                                                                                                                                                                                                                                                                                                                                                                                                                                                                                         |
|                                 |                                                                                                                                                                                                                                                                                                                                                                                                                                                                                                                                                                                                                                                                                                                                                                                                                                                                                                                                                                                                                                                                                                                                                                                                                                                                                                           |

SCHOLARONE™  
Manuscripts



1  
2  
3  
4  
5  
6  
7  
8  
9  
10  
11  
12  
13  
14

# Effect of a Six Month Vegan Low-Carbohydrate (“Eco-Atkins”) Diet on Cardiovascular Risk Factors and Body Weight in Hyperlipidemic Adults: A Randomized Controlled Trial

15 David JA Jenkins, MD<sup>1-5</sup> Julia MW Wong, PhD<sup>1,3</sup> Cyril WC Kendall, PhD<sup>1,3</sup> Amin Esfahani,  
16 MSc<sup>1,3</sup> Vivian WY Ng, RD<sup>1,3</sup> Tracy CK Leong, BSc<sup>1,3</sup> Dorothea A Faulkner, PhD<sup>1,3</sup> Ed  
17 Vidgen, BSc<sup>1,3</sup> Gregory Paul, PhD<sup>6</sup> Ratna Mukherjea, PhD<sup>6</sup> Elaine S. Krul, PhD<sup>6</sup> William  
18 Singer, MD<sup>1-4</sup>  
19  
20  
21  
22  
23  
24  
25  
26

27 Departments of <sup>1</sup>Nutritional Sciences, <sup>2</sup>Medicine, Faculty of Medicine, University of Toronto,  
28 Toronto, Ontario, Canada; <sup>3</sup>Clinical Nutrition & Risk Factor Modification Center, St. Michael’s  
29 Hospital, Toronto, Ontario, Canada; <sup>4</sup>Department of Medicine, Division of Endocrinology and  
30 Metabolism, <sup>5</sup>Li Ka Shing Knowledge Institute, St. Michael’s Hospital, Toronto, Ontario,  
31 Canada; <sup>6</sup>Solae LLC, St. Louis, Missouri, USA  
32  
33  
34  
35  
36  
37  
38

39 JMWW current affiliation is the New Balance Foundation Obesity Prevention Center, Boston Children’s  
40 Hospital, Boston, MA, USA, and Department of Pediatrics, Harvard Medical School, Boston, MA, USA.  
41  
42

43 AE current affiliation is New York Medical College, School of Medicine, Valhalla, NY, USA.  
44

45 Address correspondence and reprint requests to David JA Jenkins, Clinical Nutrition and Risk  
46 Factor Modification Center, St. Michael’s Hospital, 61 Queen St. East, Toronto, Ontario,  
47  
48 CANADA, M5C 2T2. Phone: (416) 978-4752; Fax: (416) 978-5310; EM:  
49  
50  
51

52 [cyril.kendall@utoronto.ca](mailto:cyril.kendall@utoronto.ca)  
53  
54

55  
56 **Manuscript Word Count:** 3,932  
57  
58  
59  
60

1  
2  
3 **Number of Tables:** 3  
4

5 **Number of Figures:** 3  
6

7  
8 **Number of References:** 59  
9

10 **Running Title:** Weight loss in hyperlipidemia on a vegan diet  
11

12 **Trial Registration:** #NCT00256516  
13

14 **Keywords:** weight loss, vegetable proteins, nuts, soy, vegan diet, hyperlipidemia  
15  
16

17 **Abstract Word Count:** 273 (up to 300 allowed)  
18  
19  
20  
21  
22  
23  
24  
25  
26  
27  
28  
29  
30  
31  
32  
33  
34  
35  
36  
37  
38  
39  
40  
41  
42  
43  
44  
45  
46  
47  
48  
49  
50  
51  
52  
53  
54  
55  
56  
57  
58  
59  
60

**Abstract**

**Objective:** Low-carbohydrate diets may be useful for weight loss. Diets high in vegetable proteins and oils may reduce the risk of coronary heart disease (CHD). The main objective was to determine the longer term effect of a diet that was both low-carbohydrate and plant-based on weight loss and LDL-C.

**Design, Setting, Participants:** A parallel design study of 39 overweight hyperlipidemic men and postmenopausal women conducted at a Canadian university-affiliated hospital nutrition research center from April 2005 to November 2006.

**Intervention:** Participants were advised to consume either a low-carbohydrate vegan diet or a high-carbohydrate lacto-ovo vegetarian diet for six-months after completing one-month metabolic (all foods provided) versions of these diets. The prescribed macronutrient intakes for the low- and high-carbohydrate diets were: 26% and 58% of energy from carbohydrate, 31% and 16% from protein and 43% and 25% from fat, respectively.

**Primary Outcome:** Change in body weight.

**Results:** Twenty-three participants (50% test, 68% control) completed the six-month ad libitum study. The approximate 4kg weight loss on the metabolic study was increased to -6.9kg on low-carbohydrate and -5.8kg on high-carbohydrate six-month ad libitum treatments (treatment difference [95% CI]: -1.1kg [-2.1, 0.0], P=0.047). The relative LDL-C and triglyceride reductions were also greater on the low-carbohydrate treatment (treatment difference [95% CI]: -0.49mmol/L [-0.70, -0.28], P<0.001 and -0.34mmol/L [-0.57, -0.11], P=0.005, respectively), as were the TC:HDL-C and apolipoprotein B:A1 ratios (-0.57 [-0.83, -0.32], P<0.001 and -0.05 [-0.09, -0.02], P=0.003, respectively).

1  
2  
3 **Conclusions:** A self-selected low-carbohydrate vegan diet, containing increased protein and fat  
4  
5 from gluten and soy products, nuts, and vegetable oils, had lipid lowering advantages over a  
6  
7 high-carbohydrate, low-fat weight loss diet, thus improving heart disease risk factors.  
8  
9

10  
11  
12 **Trial Registration:** clinicaltrials.gov (<http://www.clinicaltrials.gov/>), #NCT00256516  
13  
14  
15  
16  
17  
18  
19  
20  
21  
22  
23  
24  
25  
26  
27  
28  
29  
30  
31  
32  
33  
34  
35  
36  
37  
38  
39  
40  
41  
42  
43  
44  
45  
46  
47  
48  
49  
50  
51  
52  
53  
54  
55  
56  
57  
58  
59  
60

For peer review only

## Article Summary

### Article Focus

- Low-carbohydrate diets may be useful for weight loss. Diets high in vegetable proteins and oils may reduce the risk of coronary heart disease (CHD).
- The objective of the randomized clinical trial was to determine the longer term effect of a diet that was both low-carbohydrate and plant-based on weight loss and LDL-C.
- We have already reported the effect of this dietary strategy in producing a difference of 8% in LDL-C reduction between calorie-restricted diets (60% of estimated calorie requirements) when all food was provided. We now report findings after these same participants continued on their respective diets for an additional 6 months, under self-selected conditions, in order to gain insights into the real life effectiveness of this diet.

### Key Messages

- By comparison with the high-carbohydrate diet, consumption of the low-carbohydrate diet containing vegetable proteins and oils was also associated with significantly reduced concentrations of LDL-C. This LDL-C reduction has not been reported for other low-carbohydrate diet studies in which a large part of the protein and fat originated from animal sources.
- The present study also demonstrated that consumption of a low-carbohydrate vegan diet resulted in modestly greater body weight reductions compared to a high-carbohydrate diet (7% versus 6% reductions, respectively) over a six-month ad libitum period.

- 1  
2  
3 - The sustained reduction in LDL-C, associated with a small incremental weight loss on the 6-  
4 month self-selected diet, is a potentially important attribute of the diet in reducing long-term  
5  
6  
7  
8 CHD risk  
9

### 10 11 12 **Strengths and Limitations of this Study**

13  
14  
15 The study weaknesses include the relatively small sample size and the high dropout rate.

16  
17  
18 Nevertheless, it is noteworthy that attrition rates were low in the metabolic study when all food  
19  
20 was provided [1]. Food availability and preparation may therefore be important factors. For those  
21  
22 who did complete the study, however, there were benefits in weight loss and LDL-C reduction,  
23  
24 an additional 2% advantage in body weight reduction compared to the high-carbohydrate diet  
25  
26 and a 13% drop in LDL-C for participants consuming a more plant-based low-carbohydrate diet.

27  
28  
29 The study's strength is that the prescribed hypocaloric diet was self-selected, meaning the results  
30  
31 are more in line with what can be expected under free-living conditions. The breadth of  
32  
33 application of the plant-based low-carbohydrate diet, however, remains to be determined, but it  
34  
35 may provide an option for some individuals for whom LDL-C reduction is an equal concern to  
36  
37 weight loss. If low-carbohydrate dietary options become more generally available the number of  
38  
39 individuals who will benefit is likely to increase.  
40  
41  
42  
43  
44  
45  
46  
47  
48  
49  
50  
51  
52  
53  
54  
55  
56  
57  
58  
59  
60

## Introduction

Many popular weight loss diets emphasize carbohydrate restriction (Atkins, Eddies, South Beach, Zone). Their success is determined by the level of compliance with the prescribed diets [2-7]. However, a high content of animal products, rich in saturated fat and cholesterol, may make conventional low-carbohydrate diets less appropriate for those with hypercholesterolemia [3 8]. Even during active weight loss, these high saturated fat diets do not lower serum LDL-C below baseline [3 8] and there is concern that if such diets continue to be eaten when weight loss has ceased, a more atherogenic blood lipid profile may result [9]. These concerns have prompted exploration of other weight loss strategies, but only modest reductions in LDL-C have been observed [10].

By contrast vegan diets significantly lower LDL-C [11]. Trials of vegan and vegetarian diets also reduce progression of coronary heart disease (CHD) [12] and improve diabetes control [13].

Plant food components such as vegetable proteins, vegetable oils, nuts and viscous fibers, reduce serum lipids in many studies [14-19] and may increase flow mediated vasodilatation [20-23].

Nuts, fiber and vegetarian diets in general, all reduce CHD and diabetes in cohort studies [24-29]. Finally, in cohort studies, low-carbohydrate diets, high in vegetable oils and proteins as opposed to animal products, reduce CHD events and diabetes incidence in women [30 31], while lower red meat intake reduces total, cardiovascular and cancer mortality [32]. Most recently a large randomized controlled trial confirmed the effect of nuts and increased vegetable oil (olive oil) intake in reducing cardiovascular events in the context of a Mediterranean diet [33].

In view of the apparent success of low-carbohydrate diets for weight loss and the demonstration that relatively high-carbohydrate vegetarian and vegan diets, and diets low in animal products, lower CHD risk factors [34-37], we designed a diet that combined both vegan and low-

1  
2  
3 carbohydrate elements to determine whether such a diet captured both the weight loss and CHD  
4 risk reduction advantages. We have already reported the effect of this dietary strategy in  
5 producing a difference of 8% in LDL-C reduction between calorie-restricted diets (60% of  
6 estimated calorie requirements) when all food was provided [1]. We now report findings after  
7 these same participants continued on their respective diets for an additional 6 months, under self-  
8 selected conditions, in order to gain insights into the real life effectiveness of this diet. The  
9 results of the metabolic (all foods provided) study have been reported previously and had  
10 demonstrated a CHD risk factor advantage, but with no greater weight loss than the control diet  
11 [1].  
12  
13  
14  
15  
16  
17  
18  
19  
20  
21  
22  
23  
24  
25  
26

## 27 **Methods**

### 28 **Participants**

29  
30 Forty-seven overweight participants, recruited by newspaper advertisement and hospital clinic  
31 notices, undertook the one-month metabolic first phase of the study (Figure 1) that has been  
32 previously reported [1]. At the start of the study, participants were given the option to participate  
33 in both the metabolic and ad libitum phases or only the metabolic phase. On completion of the  
34 metabolic phase, thirty-nine participants (19 control and 20 test participants) continued for an ad  
35 libitum six-month study and their data (n=39) were used in the final analysis (Table 1). The  
36 study was conducted at a Canadian university-affiliated hospital nutrition research center from  
37 April 2005 to November 2006. All participants had high normal to raised LDL-C levels  
38 (>3.4mmol/L at diagnosis) and a body mass index > 27 kg/m<sup>2</sup>. Details of the eligibility criteria  
39 have been previously reported [1]. After recruitment, the 11/39 participants who were taking  
40  
41  
42  
43  
44  
45  
46  
47  
48  
49  
50  
51  
52  
53  
54  
55  
56  
57  
58  
59  
60



1  
2  
3 lipid lowering medications discontinued their medications at least two weeks prior to starting and  
4  
5 for the study duration (Table 1).  
6  
7  
8  
9

### 10 **Study Protocol**

11  
12 The intervention was a randomized parallel study stratified by sex in which participants were  
13  
14 randomized to either low- or high-carbohydrate, calorie-reduced diets. The first month was the  
15  
16 previously reported metabolically controlled study [1]. For the following six-months, participants  
17  
18 continued on the diet to which they had been assigned as a self-selected (ad libitum) diet.  
19  
20

21 Anthropometric, blood pressure and blood lipid measurements were repeated at monthly  
22  
23 intervals. Insulin and HbA1c were measured at baseline and at the start and end of the ad libitum  
24  
25 treatment. Percentage body fat was measured at baseline and end of the ad libitum treatment by  
26  
27 bioelectrical impedance (Quantum II; RJL Systems, Clinton Township, Michigan). Seven-day  
28  
29 diet and exercise histories were recorded in the week prior to each monthly visit. These histories  
30  
31 were reviewed and discussed with the dietitian and appropriate dietary counselling was provided  
32  
33 to enhance adherence. The overall feeling of satiety for the previous week was assessed at each  
34  
35 study visit using a 9-point bipolar semantic scale, where -4 was extremely hungry, 0 was neutral,  
36  
37 and +4 was uncomfortably full [1 35]. No exercise advise was given during the study, but  
38  
39 alterations in exercise were allowed and recorded.  
40  
41  
42  
43  
44

45 The Ethics Committees of St. Michael's Hospital and the University of Toronto, and the  
46  
47 Therapeutic Products Directorate of Health Canada approved the study. Written informed  
48  
49 consent was obtained from the participants. The study's clinical trial registration number was  
50  
51 #NCT00256516.  
52  
53  
54  
55  
56  
57  
58  
59  
60

## Diets

As with the previous metabolic study, participants were encouraged to eat only 60% of their estimated caloric requirements in order to continue the body weight reduction started on their metabolic phase [38-40]. The prescribed test diet was a low-carbohydrate vegan diet containing 26% of calories from carbohydrate, 31% of calories from vegetable proteins and 43% from fat (primarily vegetable oils). Carbohydrate sources on the low-carbohydrate diet featured viscous fiber-containing foods (such as oats and barley) and low-starch vegetables (emphasizing okra and eggplant) for the relatively limited amount of carbohydrate allowed. The vegetable proteins were prescribed as gluten (54.8% of total protein), soy (23.0%), fruits and vegetables (8.7%), nuts (7.5%), and cereals (6.0%). Gluten was contained in the nut bread and wheat gluten (also called “seitan”) products. Soy protein was present in the form of burgers, deli slices, breakfast links, veggie bacon, tofu, and soy milks. Nuts included almonds, cashews, hazelnuts, macadamia, pecans, and pistachios. The fat sources were nuts (43.6% of total fat), vegetable oils (24.4%), soy products (18.5%), avocado (7.1%), cereals (2.7%), fruits and vegetables (2.3%), and seitan products (1.4%). Participants were able to purchase at the research center the “no” starch high protein nut bread and three of the seitan (wheat gluten) products used in the study which were not available in Canada. The control, high-carbohydrate lacto-ovo vegetarian diet (58% carbohydrate, 16% protein and 25% fat) emphasized whole wheat cereals and cereal fiber, as well as low-fat or skim milk dairy products and liquid egg substitute to reduce saturated fat and cholesterol intakes. These diets have been published previously [1]. Participants were given a copy of the menu plans that outlined the food items and amounts prescribed during the metabolic phase. These menu plans served as a reference during the ad libitum phase.

1  
2  
3 Furthermore, participants were given an exchange list of the items prescribed on the menu plan.

4  
5 The goal was to enhance adherence.

6  
7  
8 Self-taring electronic scales (My Weigh Scales, Vancouver, BC or Tanita Corporation, Arlington  
9 Heights, IL) were provided to all participants and they were instructed to weigh all food items  
10 while recording the seven-day food diary in the week prior to monthly clinic visits. Adherence to  
11 the three principal cholesterol-lowering components [vegetable proteins (soy and gluten), nuts,  
12 and viscous fibers] of the low-carbohydrate diet was assessed from the completed monthly  
13 seven-day food records. The amount of each component provided during the metabolic phase  
14 remained the same as that prescribed during the ad libitum phase.

15  
16  
17 Neither the dietitians nor participants could be blinded, but equal emphasis was placed on the  
18 potential importance for health of both diets. The analytical technicians were blinded to diet  
19 allocation, as was the statistician, up to analysis of the primary outcome. Participants were  
20 offered no financial compensation for participation in the study.  
21  
22  
23  
24  
25  
26  
27  
28  
29  
30  
31  
32  
33  
34  
35

### 36 **Analyses**

37  
38 The analytical techniques have been reported previously [1]. Serum was analyzed in the J. Alick  
39 Little Lipid Research Laboratory [35]. LDL-C (in mmol/L) was calculated by the method of  
40 Friedewald et al. [1], using all data including the two participants who had baseline and during  
41 study triglyceride values above 4.5 mmol/L (3 values on low-carbohydrate diet and 2 on high-  
42 carbohydrate diet, maximum triglyceride < 6.5 mmol/L) (exclusion of these two individuals did  
43 not alter the findings). The methods for analyzing apolipoproteins A1 and B, high sensitivity C-  
44 reactive protein (hs-CRP), blood glucose, insulin, HbA1c, and homeostasis model assessment –  
45 insulin resistance model (HOMA-IR) have been described previously [1]. Exercise data were  
46  
47  
48  
49  
50  
51  
52  
53  
54  
55  
56  
57  
58  
59  
60

1  
2  
3 calculated as metabolic equivalents (METs) [41]. The absolute 10-year CHD risk score was  
4  
5 calculated using the Framingham risk equation [42].  
6

7  
8 Diets were assessed for macronutrients, fatty acids, cholesterol and fiber using a computer  
9  
10 program based on the USDA database [43] and developed in our laboratory to allow the addition  
11  
12 of the macronutrient content of study foods obtained from food labels or directly from food  
13  
14 manufacturers. The nutritional profiles of the diets were calculated from the 7-day food records  
15  
16 completed once a month throughout the study and mean intakes are presented.  
17  
18

19  
20 Adherence to the three principal cholesterol-lowering components [vegetable proteins (soy and  
21  
22 gluten), nuts, and viscous fibers] of the low-carbohydrate diet was estimated from the 7-day food  
23  
24 records. Each component was assessed as contributing 1/3 or 33.3% to the LDL-C reduction.  
25  
26

27 When the amount consumed was equivalent to the amount prescribed a 33.3% compliance would  
28  
29 be recorded for that component. The sum of the three components if consumed as prescribed  
30  
31 would equal 100% adherence.  
32  
33

### 34 35 36 **Statistical Analyses**

37  
38 Results are expressed as means  $\pm$  SEM or 95% confidence intervals (CIs). Time zero was used as  
39  
40 the baseline and refers to the pre-metabolic study baseline [1]. Treatment differences in physical  
41  
42 and biochemical measures were assessed using all available data from the 39 participants and a  
43  
44 repeated measures mixed model accounting for time of assessment (SAS 9.2) [44] in the Tables  
45  
46 (Table 2 and 3) and the Results. The response variable was change from baseline, with diet and  
47  
48 week as fixed effects and subject ID nested in diet. There was no adjustment for baseline. Any  
49  
50 participant who started the ad libitum treatment was included in the analysis (N=39). The  
51  
52 completer analysis included the 23 participants who completed the study (Figure 1).  
53  
54  
55  
56  
57  
58  
59  
60

1  
2  
3 Multiple imputation (taking the mean of 5 sets of randomly imputed values) was used to present  
4  
5 baseline and treatment values in the Tables (2 and 3) and Figures (2 and 3) by generating data for  
6  
7 those who dropped out or had missing values [44].  
8  
9

## 10 11 12 **Results**

13  
14 Compliance with the major dietary components [vegetable proteins (soy and gluten), nuts, and  
15  
16 viscous fibers] was 33.6% or one-third of that prescribed during the metabolic phase (Table 2).  
17  
18 Saturated fat intakes were similar on both treatments whereas intake of monounsaturated fats,  
19  
20 vegetable proteins, and soy protein were significantly higher on the low-carbohydrate diet (Table  
21  
22 2). Available carbohydrate intake was significantly lower on the low-carbohydrate diet (Table 2).  
23  
24 The attrition rate was 50% (10/20) on the low-carbohydrate and 32% (6/19) on the high-  
25  
26 carbohydrate (Figure 1), this equates to a total attrition rate of 41% (16/39). The number of  
27  
28 participants who did not complete the study (including dropouts and withdrawals) did not differ  
29  
30 between treatments. Three participants were withdrawn by the study physician due to failure to  
31  
32 attain LDL-C targets on the low-carbohydrate diet (mean LDL-C = 5.24mmol/L) and one subject  
33  
34 on the high-carbohydrate diet (LDL-C = 7.78mmol/L). Participants on the low-carbohydrate diet  
35  
36 tended to have larger reductions in body weight over time (Figure 2). The weight loss from  
37  
38 baseline to the end of the 6-month ad libitum treatment was -6.9kg [95% CI, -7.7, -6.1] on the  
39  
40 low-carbohydrate and -5.8kg [95% CI, -6.6, -5.1] on the control diet with a significant difference  
41  
42 between groups (treatment difference [95% CI]: -1.1kg [-2.1, 0.0]; P=0.047) (Table 3). The final  
43  
44 reduction in BMI was also greater on the low-carbohydrate versus high-carbohydrate diet  
45  
46 (treatment difference [95% CI]: -0.4kg/m<sup>2</sup> [-0.8, 0.0]; P=0.039) (Table 3). Among the  
47  
48 completers, there were numerically larger differences between treatments for both body weight  
49  
50  
51  
52  
53  
54  
55  
56  
57  
58  
59  
60

1  
2  
3 and BMI (treatment difference [95% CI]: -1.8 kg [-3.0, -0.6]; P=0.004 and -0.7 kg/m<sup>2</sup> [-1.1, -  
4  
5 0.2]; P=0.004, respectively).

6  
7  
8 There was a relative increase in recorded exercise by the high-carbohydrate diet participants,  
9  
10 whereas there was no relative change in the low-carbohydrate participants (treatment difference  
11  
12 [95% CI]: -9.3 [-16.4, -2.2] METs; P=0.012), but this was not reflected in a greater weight loss  
13  
14 (Table 3). There were no treatment differences in percent body fat, waist circumference or satiety  
15  
16 (Table 3).  
17  
18  
19

## 20 21 22 **Lipids**

23  
24 At the end of the study, the reduction on the low-carbohydrate versus high-carbohydrate diet was  
25  
26 greater for LDL-C (treatment difference [95% CI]: -0.49mmol/L [-0.70, -0.28]; P<0.001, for TC  
27  
28 (-0.62mmol/L [-0.86, -0.37]; P<0.001, for TC:HDL-C -0.57 [-0.83, -0.32]; P<0.001, for LDL-  
29  
30 C:HDL-C (-0.42 [-0.60, -0.24]; P<0.001, and for triglycerides (-0.34mmol/L [-0.57, -0.11];  
31  
32 P=0.005). No treatment difference was seen in HDL-C (Table 3). A similar pattern was observed  
33  
34 in the completers. The treatment difference was numerically larger for LDL-C (-0.60mmol/L [-  
35  
36 0.84, -0.36]; P<0.0001), TC (-0.73mmol/L [-1.00, -0.45]; P<0.0001), TC:HDL-C (-0.68 [-0.97, -  
37  
38 0.39]; P<0.0001), and LDL-C:HDL-C (-0.53 [-0.73, -0.32]; P<0.0001). Values for LDL-C and  
39  
40 the TC:HDL-C ratio were consistently lower in participants on the low-carbohydrate diet  
41  
42 throughout the study while HDL-C values were not different from baseline (Figure 3 A-C).  
43  
44  
45  
46  
47  
48  
49

## 50 51 **Apolipoproteins**

52  
53 ApoB and the ApoB:A1 ratio were reduced more on the low- versus the high-carbohydrate diet  
54  
55 at the end of the study (treatment different [95% CI]: -0.11g/L [-0.16, -0.06]; P<0.001 and -0.05  
56  
57  
58  
59  
60

1  
2  
3 [-0.09, -0.02]; P=0.003, respectively) (Table 3). No significant difference between the diets was  
4  
5 observed for ApoA1 concentrations. The pattern of change in the apolipoproteins in the  
6  
7 completers reflected the changes seen in the whole group. Figure 3D and 3F show that the low-  
8  
9 carbohydrate diet resulted in lower apoB and ApoB:ApoA1 ratios relative to baseline over the  
10  
11 course of the study.  
12  
13

### 14 15 16 17 18 **C-Reactive Protein, HbA1c, Blood Glucose, Serum Insulin, Insulin Resistance and Blood** 19 20 **Pressure**

21  
22 Both treatments reduced hs-CRP with no difference between treatments (Table 3). HbA1c,  
23  
24 fasting blood glucose, insulin, and insulin resistance (calculated using the HOMA model) fell  
25  
26 similarly on both treatments during the course of the study (Table 3). Systolic and diastolic blood  
27  
28 pressure decreased similarly with no treatment differences (Table 3). The completers also failed  
29  
30 to show a difference between treatments.  
31  
32

### 33 34 35 36 **Calculated CHD Risk**

37  
38 The low-carbohydrate diet significantly reduced the calculated 10-year CHD risk relative to the  
39  
40 high-carbohydrate diet (2% [-2, -1]; P<0.001) (Table 3). A reduced CHD risk on the low-  
41  
42 carbohydrate diet was also observed in the completers (2% [-3, -1]; P<0.001).  
43  
44  
45  
46  
47

### 48 **Adverse Events**

49  
50 No serious adverse events or events that involved hospitalisation occurred during the study.  
51  
52  
53  
54

### 55 **Discussion**

1  
2  
3 The present study demonstrated that consumption of a low-carbohydrate vegan diet resulted in a  
4 modestly greater body weight reduction compared to a high-carbohydrate diet (7% versus 6%  
5 reductions, respectively) over a six-month ad libitum period. These reductions were similar to  
6 those reported for low-carbohydrate “Atkins-like” diets[2 3 6 10]. However by comparison with  
7 the high-carbohydrate diet, consumption of the low-carbohydrate diet containing vegetable  
8 proteins and oils was also associated with significantly reduced concentrations of LDL-C. This  
9 LDL-C reduction has not been reported for other low-carbohydrate diet studies in which a large  
10 part of the protein and fat originated from animal sources and in which no significant LDL-C  
11 reductions were seen [2-6 8]. The sustained reduction in LDL-C, associated with a small  
12 incremental weight loss on the 6-month self-selected diet, is a potentially important attribute of  
13 the diet in reducing long-term CHD risk [45 46]. Furthermore, as seen in the present study, a  
14 low-carbohydrate diet, in which vegetable fat and protein options were encouraged,  
15 demonstrated a larger reduction in the TC:HDL-C ratio than that reported at 6 months in weight  
16 loss studies employing either a Mediterranean or a high-carbohydrate diet [10].

17  
18  
19  
20  
21  
22  
23  
24  
25  
26  
27  
28  
29  
30  
31  
32  
33  
34  
35  
36  
37  
38  
39  
40  
41  
42  
43  
44  
45  
46  
47  
48  
49  
50  
51  
52  
53  
54  
55  
56  
57  
58  
59  
60  
The majority of studies undertaken to date have been 6 months to one year in duration [2-6 47]  
with more recent studies of up to 2 years [2 8]. The high dropout rate in the present 6-month  
study did not prevent identification of significant LDL-C and body weight differences in the  
intent-to-treat analysis (using all available data). However, the completer data demonstrated an  
even larger treatment difference in LDL-C favoring the low-carbohydrate treatment. Those on  
the low-carbohydrate diet showed overall adherence to the major dietary components [vegetable  
proteins (soy and gluten), nuts, and viscous fibers] at 33.6% of that provided during the  
metabolic phase [1]. This adherence is similar to the 43.3% seen with the dietary portfolio in the  
comparison of the metabolic one month [35] and the ad libitum six month studies [48]. In this



1  
2  
3 study, the LDL-C reduction on the low-carbohydrate metabolic month was also greater than that  
4  
5 on the ad libitum 6 months, although the treatment differences were similar [35].  
6

7  
8 The effect of low-carbohydrate diets on CHD events has not been assessed in randomized  
9  
10 controlled trials. Nevertheless, low-carbohydrate diets high in vegetable proteins and oils have  
11  
12 been associated with a 30% reduced CHD risk and an 18% reduced incidence of diabetes in  
13  
14 cohort studies [30 31]. The median interquartile difference in these studies between the first and  
15  
16 10<sup>th</sup> decile for vegetable protein and monounsaturated fat (MUFA) intakes, as a marker of  
17  
18 increased vegetable oil consumption, was 1.4% and 9.3% expressed as a percentage of total  
19  
20 caloric intake [30]. These figures compare with an 8.2% and a 4.6% relative increase in  
21  
22 vegetable protein and oil consumption from baseline on the Eco-Atkins diet compared to the  
23  
24 control diet. The increases in MUFA were therefore seen in both studies. Recently a Spanish  
25  
26 Mediterranean diet emphasizing increased nut or olive oil consumption, and so increasing  
27  
28 monounsaturated fat intake by 2-3%, has been shown to significantly reduce cardiovascular  
29  
30 events also by approximately 30% [33]. These data provide consistent support for the view that  
31  
32 the Eco-Atkins approach would reduce CHD risk in the long term.  
33  
34

35  
36 The present diet, while lowering LDL-C by 9%, did not result in any significant depression of  
37  
38 HDL-C. Lowering LDL-C while maintaining HDL-C would be expected to reduce CHD risk [45  
39  
40 46]. Similarly, reductions in ApoB and the ApoB:A1 ratio were also observed in the present  
41  
42 study. These findings further support the potential CHD benefit that this weight loss diet may  
43  
44 have [49-51]. It has also been claimed that apolipoproteins may be stronger predictors of CHD  
45  
46 events than conventional lipid variables [52-54].  
47  
48

49  
50 In contrast to the metabolic study, the reductions in systolic and diastolic blood pressure were not  
51  
52 significant between the low- and high-carbohydrate diets. Similarly, hs-CRP was unchanged  
53  
54  
55  
56  
57  
58  
59  
60

1  
2  
3 between treatments, however, the level was significantly reduced with the low-carbohydrate diet  
4 compared to baseline. Studies have shown that hs-CRP tended to be lowest on the diets  
5  
6 containing the highest proportion of carbohydrate [5]. Low glycemic index and low glycemic  
7  
8 load diets have also been associated with lower hs-CRP concentrations [55 56]. These  
9  
10 advantages of the higher carbohydrate diet may have reduced any hs-CRP difference between the  
11  
12 two diets in the present study.  
13  
14

15  
16 Soy-containing foods as well as nuts have cholesterol lowering effects [15 17 18 57 58] and may  
17  
18 explain the reduction in LDL-C. Viscous fiber in low starch vegetables and  $\beta$ -glucan in oats and  
19  
20 barley may also have contributed to the overall cholesterol lowering effect of the diet [9 14 45].  
21  
22 Furthermore, nuts and high fiber food consumption have been associated with lower body weight  
23  
24 [59].  
25  
26

27  
28 The study weaknesses include the relatively small sample size and the high dropout rate.  
29

30  
31 Nevertheless, it is noteworthy that attrition rates were low in the metabolic study when all food  
32  
33 was provided [1]. Food availability and preparation may therefore be important factors. Future  
34  
35 studies will need to focus on strategies to increase and maintain adherence, especially to the  
36  
37 cholesterol lowering components, which all bear US FDA health claims for cardiovascular  
38  
39 disease risk reduction. Furthermore, collaboration with food industry may be helpful in  
40  
41 addressing concerns of availability, variety, and ease of preparation. In retrospect, a simplified  
42  
43 one page eating plan for breakfast, lunch, and dinner with a number of options and amounts for  
44  
45 each meal, as we have used in our dietary portfolio studies, might also be helpful [48]. For those  
46  
47 who did complete the study, however, there were benefits in weight loss and LDL-C reduction,  
48  
49 an additional 2% advantage in body weight reduction compared to the high-carbohydrate diet  
50  
51 and a 13% drop in LDL-C for participants consuming a more plant-based low-carbohydrate diet.  
52  
53  
54  
55  
56  
57  
58  
59  
60

1  
2  
3 Unfortunately it was not possible to predict who would complete the diet based on pre-study data  
4  
5 or changes observed during the metabolic phase.  
6  
7

8 The study's strength is that the prescribed hypocaloric diet was self-selected, meaning the results  
9  
10 are more in line with what can be expected under free-living conditions. The breadth of  
11  
12 application of the plant-based low-carbohydrate diet, however, remains to be determined, but it  
13  
14 may provide an option for some individuals for whom LDL-C reduction is an equal concern to  
15  
16 weight loss. If low-carbohydrate dietary options become more generally available the number of  
17  
18 individuals who will benefit is likely to increase.  
19  
20  
21

22 We conclude that a weight loss diet which reduced carbohydrate in exchange for increased  
23  
24 intakes of vegetable sources of protein, such as gluten, soy and nuts, together with vegetable oils  
25  
26 offers an opportunity to improve both LDL-C and body weight, both being risk factors for CHD.  
27  
28 Further trials are warranted to evaluate low-carbohydrate diets, including more plant-based low-  
29  
30 carbohydrate diets, on CHD risk factors and ultimately on CHD.  
31  
32  
33  
34  
35  
36  
37  
38  
39  
40  
41  
42  
43  
44  
45  
46  
47  
48  
49  
50  
51  
52  
53  
54  
55  
56  
57  
58  
59  
60

## Acknowledgements

We thank all the study participants for their attention to detail and enthusiasm.

Dr. Jenkins, together with those responsible for analysis and interpretation of data, had full access to all the data in the study and takes responsibility for the integrity of the data and the accuracy of the data analysis.

## Sources of Funding

This study was supported by Solae, LLC; Loblaw Companies Limited, and the Canada Research Chair Program of the Federal Government of Canada. Dr. Wong was a recipient of a Canadian Institutes of Health Research (CIHR) Doctoral Research Award, and is now a holder of a CIHR Randomized Controlled Trials – Mentoring Program Training Grant.

## Contributions

*Conception and design* - Jenkins, Wong, Kendall, Faulkner, Paul, Mukherjea, Krul, Singer

*Acquisition of data* - Jenkins, Wong, Kendall, Esfahani, Ng, Leong

*Analysis and interpretation of data* – Jenkins, Wong, Kendall, Vidgen

*Drafting of the manuscript* – Jenkins, Wong

*Critical revision of the manuscript for important intellectual content* – Jenkins, Wong, Kendall, Esfahani, Ng, Leong, Faulkner, Vidgen, Paul, Mukherjea, Krul, Singer

*Statistical analysis* - Vidgen

*Obtaining funding* – Jenkins, Kendall, Wong

*Administrative, technical, or material support* – Wong, Kendall, Esfahani, Ng, Leong, Faulkner

*Supervision* – Jenkins, Kendall, Wong, Singer

1  
2  
3 *No additional contributions* - Paul, Mukherjea, Krul  
4  
5  
6  
7

### 8 **Role of the Sponsors**

9

10 None of the funding organizations or sponsors played any significant role in the design and  
11  
12 conduct of the study, in the collection, management, analysis, and interpretation of the data, or in  
13  
14 the preparation, or approval of the manuscript. However, the named co-authors from Solae LLC  
15  
16 reviewed the manuscript.  
17  
18  
19  
20

### 21 **Disclosures**

22

23  
24 Dr. Jenkins has served on the Scientific Advisory Board of Sanitarium Company, Agri-Culture  
25  
26 and Agri-Food Canada (AAFC), Canadian Agriculture Policy Institute (CAPI), California  
27  
28 Strawberry Commission, Loblaw Supermarket, Herbal Life International, Nutritional  
29  
30 Fundamental for Health, Pacific Health Laboratories, Metagenics, Bayer Consumer Care, Orafti,  
31  
32 Dean Foods, Kellogg's, Quaker Oats, Procter & Gamble, Coca-Cola, NuVal Griffin Hospital,  
33  
34 Abbott, Pulse Canada, Saskatchewan Pulse Growers, and Canola Council of Canada; received  
35  
36 honoraria for scientific advice from Sanitarium Company, Orafti, the Almond Board of  
37  
38 California, the American Peanut Council, International Tree Nut Council Nutrition Research and  
39  
40 Education Foundation and the Peanut Institute, Herbal Life International, Pacific Health  
41  
42 Laboratories, Nutritional Fundamental for Health, Barilla, Metagenics, Bayer Consumer Care,  
43  
44 Unilever Canada and Netherlands, Solae LLC, Oldways, Kellogg's, Quaker Oats, Procter &  
45  
46 Gamble, Coca-Cola, NuVal Griffin Hospital, Abbott, Canola Council of Canada, Dean Foods,  
47  
48 California Strawberry Commission, Haine Celestial, Pepsi, and Alpro Foundation; has been on  
49  
50 the speakers panel for the Almond Board of California; received research grants from  
51  
52  
53  
54  
55  
56  
57  
58  
59  
60

1  
2  
3 Saskatchewan Pulse Growers, the Agricultural Bioproducts Innovation Program (ABIP) through  
4 the Pulse Research Network (PURENet), Advanced Food Materials Network (AFMNet),  
5  
6 Loblaw, Unilever, Barilla, Almond Board of California, Coca-Cola, Solae LLC, Haine Celestial,  
7  
8 Sanitarium Company, Orafti, International Tree Nut Council Nutrition Research and Education  
9  
10 Foundation and the Peanut Institute, the Canola and Flax Councils of Canada, Calorie Control  
11  
12 Council, Canadian Institutes of Health Research, Canada Foundation for Innovation, and the  
13  
14 Ontario Research Fund; and received travel support to meetings from the Solae LLC, Sanitarium  
15  
16 Company, Orafti, AFMNet, Coca-Cola, The Canola and Flax Councils of Canada, Oldways  
17  
18 Preservation Trust, Kellogg's, Quaker Oats, Griffin Hospital, Abbott Laboratories, Dean Foods,  
19  
20 the California Strawberry Commission, American Peanut Council, Herbal Life International,  
21  
22 Nutritional Fundamental for Health, Metagenics, Bayer Consumer Care, AAFC, CAPI, Pepsi,  
23  
24 Almond Board of California, Unilever, Alpro Foundation, International Tree Nut Council,  
25  
26 Barilla, Pulse Canada, and the Saskatchewan Pulse Growers. Dr Jenkins' wife is a director of  
27  
28 Glycemic Index Laboratories, Toronto, Ontario, Canada. Dr. Kendall reported being on speakers  
29  
30 bureaus for Almond Board of California, Solae LLC, and Unilever; and receiving research grants  
31  
32 from CIHR, Unilever, Solae LLC, Loblaw Brands Ltd, International Tree Nut Council, and  
33  
34 Almond Board of California. Mr. Vidgen has received partial salary funding from research  
35  
36 grants provided by Unilever, Loblaws, and the Almond Board of California. Drs. Paul,  
37  
38 Mukherjea, and Krul are employees of Solae, LLC.  
39  
40  
41  
42  
43  
44  
45  
46  
47  
48  
49  
50  
51  
52  
53  
54  
55  
56  
57  
58  
59  
60

## References

1. Jenkins DJ, Wong JM, Kendall CW, et al. The effect of a plant-based low-carbohydrate ("Eco-Atkins") diet on body weight and blood lipid concentrations in hyperlipidemic subjects. *Arch Intern Med* 2009;**169**(11):1046-54 doi: 10.1001/archinternmed.2009.115[published Online First: Epub Date]].
2. Samaha FF, Iqbal N, Seshadri P, et al. A low-carbohydrate as compared with a low-fat diet in severe obesity. *N Engl J Med* 2003;**348**(21):2074-81
3. Foster GD, Wyatt HR, Hill JO, et al. A randomized trial of a low-carbohydrate diet for obesity. *N Engl J Med* 2003;**348**(21):2082-90
4. Stern L, Iqbal N, Seshadri P, et al. The effects of low-carbohydrate versus conventional weight loss diets in severely obese adults: one-year follow-up of a randomized trial. *Ann Intern Med* 2004;**140**(10):778-85
5. Dansinger ML, Gleason JA, Griffith JL, et al. Comparison of the Atkins, Ornish, Weight Watchers, and Zone diets for weight loss and heart disease risk reduction: a randomized trial. *JAMA* 2005;**293**(1):43-53
6. Gardner CD, Kiazand A, Alhassan S, et al. Comparison of the Atkins, Zone, Ornish, and LEARN diets for change in weight and related risk factors among overweight premenopausal women: the A TO Z Weight Loss Study: a randomized trial. *JAMA* 2007;**297**(9):969-77
7. Sacks FM, Bray GA, Carey VJ, et al. Comparison of weight-loss diets with different compositions of fat, protein, and carbohydrates. *N Engl J Med* 2009;**360**(9):859-73 doi: 10.1056/NEJMoa0804748[published Online First: Epub Date]].

- 1  
2  
3 8. Foster GD, Wyatt HR, Hill JO, et al. Weight and metabolic outcomes after 2 years on a low-  
4 carbohydrate versus low-fat diet: a randomized trial. *Ann Intern Med* 2010;**153**(3):147-57  
5  
6 doi: 10.1059/0003-4819-153-3-201008030-00005[published Online First: Epub Date]].  
7  
8
- 9  
10 9. Anderson JW, Randles KM, Kendall CW, et al. Carbohydrate and fiber recommendations for  
11 individuals with diabetes: a quantitative assessment and meta-analysis of the evidence.  
12  
13 *Journal of the American College of Nutrition* 2004;**23**(1):5-17  
14
- 15  
16 10. Shai I, Schwarzfuchs D, Henkin Y, et al. Weight loss with a low-carbohydrate,  
17 Mediterranean, or low-fat diet. *N Engl J Med* 2008;**359**(3):229-41  
18
- 19  
20 11. Sacks FM, Ornish D, Rosner B, et al. Plasma lipoprotein levels in vegetarians. The effect of  
21 ingestion of fats from dairy products. *JAMA* 1985;**254**(10):1337-41  
22  
23
- 24  
25 12. Ornish D, Brown SE, Scherwitz LW, et al. Can lifestyle changes reverse coronary heart  
26 disease? The Lifestyle Heart Trial. *Lancet* 1990;**336**(8708):129-33  
27  
28
- 29  
30 13. Barnard ND, Cohen J, Jenkins DJ, et al. A low-fat vegan diet improves glycemic control and  
31 cardiovascular risk factors in a randomized clinical trial in individuals with type 2  
32  
33 diabetes. *Diabetes care* 2006;**29**(8):1777-83  
34  
35
- 36  
37 14. Jenkins DJ, Newton C, Leeds AR, et al. Effect of pectin, guar gum, and wheat fibre on  
38 serum-cholesterol. *Lancet* 1975;**1**(7916):1116-7  
39  
40
- 41  
42 15. Sirtori CR, Agradi E, Conti F, et al. Soybean-protein diet in the treatment of type-II  
43 hyperlipoproteinaemia. *Lancet* 1977;**1**(8006):275-7  
44  
45
- 46  
47 16. Grundy SM. Comparison of monounsaturated fatty acids and carbohydrates for lowering  
48 plasma cholesterol. *N Engl J Med* 1986;**314**(12):745-8  
49  
50
- 51  
52 17. Anderson JW, Johnstone BM, Cook-Newell ME. Meta-analysis of the effects of soy protein  
53 intake on serum lipids. *N Engl J Med* 1995;**333**(5):276-82  
54  
55  
56  
57  
58  
59  
60



- 1  
2  
3  
4  
5  
6  
7  
8  
9  
10  
11  
12  
13  
14  
15  
16  
17  
18  
19  
20  
21  
22  
23  
24  
25  
26  
27  
28  
29  
30  
31  
32  
33  
34  
35  
36  
37  
38  
39  
40  
41  
42  
43  
44  
45  
46  
47  
48  
49  
50  
51  
52  
53  
54  
55  
56  
57  
58  
59  
60
18. Kris-Etherton PM, Yu-Poth S, Sabate J, et al. Nuts and their bioactive constituents: effects on serum lipids and other factors that affect disease risk. *Am J Clin Nutr* 1999;**70**(3 Suppl):504S-11S
  19. Sabate J, Oda K, Ros E. Nut consumption and blood lipid levels: a pooled analysis of 25 intervention trials. *Arch Intern Med* 2010;**170**(9):821-7 doi: 10.1001/archinternmed.2010.79[published Online First: Epub Date].
  20. Ros E, Nunez I, Perez-Heras A, et al. A walnut diet improves endothelial function in hypercholesterolemic subjects: a randomized crossover trial. *Circulation* 2004;**109**(13):1609-14 doi: 10.1161/01.CIR.0000124477.91474.FF[published Online First: Epub Date]].
  21. Zhao G, Etherton TD, Martin KR, et al. Dietary alpha-linolenic acid reduces inflammatory and lipid cardiovascular risk factors in hypercholesterolemic men and women. *J Nutr* 2004;**134**(11):2991-7
  22. West SG, Krick AL, Klein LC, et al. Effects of diets high in walnuts and flax oil on hemodynamic responses to stress and vascular endothelial function. *Journal of the American College of Nutrition* 2010;**29**(6):595-603
  23. Ma Y, Njike VY, Millet J, et al. Effects of walnut consumption on endothelial function in type 2 diabetic subjects: a randomized controlled crossover trial. *Diabetes care* 2010;**33**(2):227-32 doi: 10.2337/dc09-1156[published Online First: Epub Date]].
  24. Appleby PN, Thorogood M, Mann JI, et al. The Oxford Vegetarian Study: an overview. *Am J Clin Nutr* 1999;**70**(3 Suppl):525S-31S
  25. Fraser GE. *Diet, life expectancy, and chronic disease: studies of Seventh-Day Adventists and other vegetarians*. New York: Oxford University Press, 2003.

- 1  
2  
3  
4  
5  
6  
7  
8  
9  
10  
11  
12  
13  
14  
15  
16  
17  
18  
19  
20  
21  
22  
23  
24  
25  
26  
27  
28  
29  
30  
31  
32  
33  
34  
35  
36  
37  
38  
39  
40  
41  
42  
43  
44  
45  
46  
47  
48  
49  
50  
51  
52  
53  
54  
55  
56  
57  
58  
59  
60
26. Pereira MA, O'Reilly E, Augustsson K, et al. Dietary fiber and risk of coronary heart disease: a pooled analysis of cohort studies. *Arch Intern Med* 2004;**164**(4):370-6
27. Li TY, Brennan AM, Wedick NM, et al. Regular consumption of nuts is associated with a lower risk of cardiovascular disease in women with type 2 diabetes. *J Nutr* 2009;**139**(7):1333-8 doi: 10.3945/jn.108.103622[published Online First: Epub Date]].
28. Kris-Etherton PM, Hu FB, Ros E, et al. The role of tree nuts and peanuts in the prevention of coronary heart disease: multiple potential mechanisms. *J Nutr* 2008;**138**(9):1746S-51S
29. Pan A, Sun Q, Manson JE, et al. Walnut consumption is associated with lower risk of type 2 diabetes in women. *J Nutr* 2013;**143**(4):512-8 doi: 10.3945/jn.112.172171[published Online First: Epub Date]].
30. Halton TL, Willett WC, Liu S, et al. Low-carbohydrate-diet score and the risk of coronary heart disease in women. *N Engl J Med* 2006;**355**(19):1991-2002
31. Halton TL, Liu S, Manson JE, et al. Low-carbohydrate-diet score and risk of type 2 diabetes in women. *Am J Clin Nutr* 2008;**87**(2):339-46 doi: 87/2/339 [pii][published Online First: Epub Date]].
32. Pan A, Sun Q, Bernstein AM, et al. Red meat consumption and mortality: results from 2 prospective cohort studies. *Archives of internal medicine* 2012;**172**(7):555-63 doi: 10.1001/archinternmed.2011.2287[published Online First: Epub Date]].
33. Estruch R, Ros E, Salas-Salvado J, et al. Primary prevention of cardiovascular disease with a Mediterranean diet. *N Engl J Med* 2013;**368**(14):1279-90 doi: 10.1056/NEJMoa1200303[published Online First: Epub Date]].
34. Sacks FM, Kass EH. Low blood pressure in vegetarians: effects of specific foods and nutrients. *Am J Clin Nutr* 1988;**48**(3 Suppl):795-800

- 1  
2  
3  
4 35. Jenkins DJ, Kendall CW, Marchie A, et al. Effects of a dietary portfolio of cholesterol-  
5  
6 lowering foods vs lovastatin on serum lipids and C-reactive protein. JAMA  
7  
8 2003;**290**(4):502-10  
9
- 10  
11 36. Appel LJ, Sacks FM, Carey VJ, et al. Effects of protein, monounsaturated fat, and  
12  
13 carbohydrate intake on blood pressure and serum lipids: results of the OmniHeart  
14  
15 randomized trial. JAMA 2005;**294**(19):2455-64  
16
- 17  
18 37. Gardner CD, Coulston A, Chatterjee L, et al. The effect of a plant-based diet on plasma lipids  
19  
20 in hypercholesterolemic adults: a randomized trial. Ann Intern Med 2005;**142**(9):725-33  
21
- 22  
23 38. Harris JA, Benedict FG. *A biometric study of basal metabolism in man*. Washington, DC:  
24  
25 Carnegie Institute of Washington, 1919 (Publication no. 279.).  
26
- 27  
28 39. Shetty PS, Henry CJ, Black AE, et al. Energy requirements of adults: an update on basal  
29  
30 metabolic rates (BMRs) and physical activity levels (PALs). Eur J Clin Nutr 1996;**50**  
31  
32 **Suppl 1**:S11-23  
33
- 34  
35 40. Pereira MA, Swain J, Goldfine AB, et al. Effects of a low-glycemic load diet on resting  
36  
37 energy expenditure and heart disease risk factors during weight loss. JAMA  
38  
39 2004;**292**(20):2482-90  
40
- 41  
42 41. Ainsworth BE, Haskell WL, Leon AS, et al. Compendium of physical activities:  
43  
44 classification of energy costs of human physical activities. Med Sci Sports Exerc  
45  
46 1993;**25**(1):71-80  
47
- 48  
49 42. Anderson KM, Wilson PW, Odell PM, et al. An updated coronary risk profile. A statement  
50  
51 for health professionals. Circulation 1991;**83**(1):356-62  
52
- 53  
54 43. USDA Nutrient Database for Standard Reference, Release 19. Nutrient Data Laboratory  
55  
56 Home Page: U.S. Department of Agriculture, Agricultural Research Service, 2006.  
57  
58  
59  
60

- 1  
2  
3  
4 44. SAS Institute. SAS/STAT User's Guide (ed 9.2) [program]. Cary, NC: SAS Institute, 2008.  
5  
6 45. Executive Summary of The Third Report of The National Cholesterol Education Program  
7  
8 (NCEP) Expert Panel on Detection, Evaluation, And Treatment of High Blood  
9  
10 Cholesterol In Adults (Adult Treatment Panel III). JAMA 2001;**285**(19):2486-97  
11  
12 46. Grundy SM, Cleeman JI, Merz CN, et al. Implications of recent clinical trials for the  
13  
14 National Cholesterol Education Program Adult Treatment Panel III guidelines.  
15  
16 Circulation 2004;**110**(2):227-39  
17  
18 47. Westman EC, Yancy WS, Edman JS, et al. Effect of 6-month adherence to a very low  
19  
20 carbohydrate diet program. Am J Med 2002;**113**(1):30-6  
21  
22 48. Jenkins DJ, Jones PJ, Lamarche B, et al. Effect of a dietary portfolio of cholesterol-lowering  
23  
24 foods given at 2 levels of intensity of dietary advice on serum lipids in hyperlipidemia: a  
25  
26 randomized controlled trial. JAMA 2011;**306**(8):831-9 doi:  
27  
28 10.1001/jama.2011.1202[published Online First: Epub Date].  
29  
30 49. Gotto AM, Jr., Whitney E, Stein EA, et al. Relation between baseline and on-treatment lipid  
31  
32 parameters and first acute major coronary events in the Air Force/Texas Coronary  
33  
34 Atherosclerosis Prevention Study (AFCAPS/TexCAPS). Circulation 2000;**101**(5):477-84  
35  
36 50. Sniderman AD, Furberg CD, Keech A, et al. Apolipoproteins versus lipids as indices of  
37  
38 coronary risk and as targets for statin treatment. Lancet 2003;**361**(9359):777-80  
39  
40 51. Yusuf S, Hawken S, Ounpuu S, et al. Effect of potentially modifiable risk factors associated  
41  
42 with myocardial infarction in 52 countries (the INTERHEART study): case-control  
43  
44 study. Lancet 2004;**364**(9438):937-52  
45  
46  
47  
48  
49  
50  
51  
52  
53  
54  
55  
56  
57  
58  
59  
60

- 1  
2  
3  
4  
5  
6  
7  
8  
9  
10  
11  
12  
13  
14  
15  
16  
17  
18  
19  
20  
21  
22  
23  
24  
25  
26  
27  
28  
29  
30  
31  
32  
33  
34  
35  
36  
37  
38  
39  
40  
41  
42  
43  
44  
45  
46  
47  
48  
49  
50  
51  
52  
53  
54  
55  
56  
57  
58  
59  
60
52. McQueen MJ, Hawken S, Wang X, et al. Lipids, lipoproteins, and apolipoproteins as risk factors of myocardial infarction in 52 countries (the INTERHEART study): a case-control study. *Lancet* 2008;**372**:224-33
53. Contois JH, McConnell JP, Sethi AA, et al. Apolipoprotein B and cardiovascular disease risk: position statement from the AACC Lipoproteins and Vascular Diseases Division Working Group on Best Practices. *Clin Chem* 2009;**55**(3):407-19 doi: 10.1373/clinchem.2008.118356[published Online First: Epub Date]].
54. Sniderman AD, Williams K, Contois JH, et al. A meta-analysis of low-density lipoprotein cholesterol, non-high-density lipoprotein cholesterol, and apolipoprotein B as markers of cardiovascular risk. *Circ Cardiovasc Qual Outcomes* 2011;**4**(3):337-45 doi: 10.1161/CIRCOUTCOMES.110.959247[published Online First: Epub Date]].
55. Liu S, Manson JE, Buring JE, et al. Relation between a diet with a high glycemic load and plasma concentrations of high-sensitivity C-reactive protein in middle-aged women. *Am J Clin Nutr* 2002;**75**(3):492-8
56. Wolever TM, Gibbs AL, Mehling C, et al. The Canadian Trial of Carbohydrates in Diabetes (CCD), a 1-y controlled trial of low-glycemic-index dietary carbohydrate in type 2 diabetes: no effect on glycated hemoglobin but reduction in C-reactive protein. *Am J Clin Nutr* 2008;**87**(1):114-25
57. Sabate J, Fraser GE, Burke K, et al. Effects of walnuts on serum lipid levels and blood pressure in normal men. *N Engl J Med* 1993;**328**(9):603-7
58. Jenkins DJ, Kendall CW, Marchie A, et al. Dose response of almonds on coronary heart disease risk factors: blood lipids, oxidized low-density lipoproteins, lipoprotein(a),

1  
2  
3 homocysteine, and pulmonary nitric oxide: a randomized, controlled, crossover trial.  
4  
5 Circulation 2002;**106**(11):1327-32  
6  
7

- 8 59. Mozaffarian D, Hao T, Rimm EB, et al. Changes in diet and lifestyle and long-term weight  
9 gain in women and men. The New England journal of medicine 2011;**364**(25):2392-404  
10  
11 doi: 10.1056/NEJMoa1014296[published Online First: Epub Date]].  
12  
13  
14  
15  
16  
17  
18  
19  
20  
21  
22  
23  
24  
25  
26  
27  
28  
29  
30  
31  
32  
33  
34  
35  
36  
37  
38  
39  
40  
41  
42  
43  
44  
45  
46  
47  
48  
49  
50  
51  
52  
53  
54  
55  
56  
57  
58  
59  
60

For peer review only

## Figure Legends

Figure 1: Patient Flow Diagram.

Figure 2: Weight loss during the study on both diets.

Figure 3: Mean (A) LDL-C, (B) HDL-C, (C) TC:HDL-C, (D) apolipoprotein B (apoB) and (E) apolipoprotein A1 (apoA1), (F) ApoB:ApoA1 ratio between the two treatments during the metabolic and ad libitum phases.

## Tables

Supplementary Table 1: Baseline Characteristics for Those Who Started the 6-Month Self-Selected Diets

Supplementary Table 2: Nutritional Profiles on the High and Low Carbohydrate Diets

Supplementary Table 3: Effect of high and low carbohydrate diets on body weight, blood lipids, apolipoproteins and 10-yr CHD risk

1  
2  
3  
4  
5  
6  
7  
8  
9  
10  
11  
12  
13  
14  
15  
16  
17  
18  
19  
20  
21  
22  
23  
24  
25  
26  
27  
28  
29  
30  
31  
32  
33  
34  
35  
36  
37  
38  
39  
40  
41  
42  
43  
44  
45  
46  
47  
48  
49  
50  
51  
52  
53  
54  
55  
56  
57  
58  
59  
60

**Effect of a Six Months-of-a Vegan Low-Carbohydrate (“Eco-Atkins”) Diet Improveson Cardiovascular Risk Factors and Body Weight in Hyperlipidemic Adults: A Randomized Controlled Trial**

David JA Jenkins, MD<sup>1-5</sup> Julia MW Wong, PhD<sup>1,3</sup> Cyril WC Kendall, PhD<sup>1,3</sup> Amin Esfahani, MSc<sup>1,3</sup> Vivian WY Ng, RD<sup>1,3</sup> Tracy CK Leong, BSc<sup>1,3</sup> Dorothea A Faulkner, PhD<sup>1,3</sup> Ed Vidgen, BSc<sup>1,3</sup> Gregory Paul, PhD<sup>6</sup> Ratna Mukherjea, PhD<sup>6</sup> Elaine S. Krul, PhD<sup>6</sup> William Singer, MD<sup>1-4</sup>

Departments of <sup>1</sup>Nutritional Sciences, <sup>2</sup>Medicine, Faculty of Medicine, University of Toronto, Toronto, Ontario, Canada; <sup>3</sup>Clinical Nutrition & Risk Factor Modification Center, St. Michael’s Hospital, Toronto, Ontario, Canada; <sup>4</sup>Department of Medicine, Division of Endocrinology and Metabolism, <sup>5</sup>Li Ka Shing Knowledge Institute, St. Michael’s Hospital, Toronto, Ontario, Canada; <sup>6</sup>Solae LLC, St. Louis, Missouri, USA

JMWW current affiliation is the New Balance Foundation Obesity Prevention Center, Boston Children’s Hospital, Boston, MA, USA, and Department of Pediatrics, Harvard Medical School, Boston, MA, USA.

AE current affiliation is New York Medical College, School of Medicine, Valhalla, NY, USA.

Address correspondence and reprint requests to David JA Jenkins, Clinical Nutrition and Risk Factor Modification Center, St. Michael’s Hospital, 61 Queen St. East, Toronto, Ontario, CANADA, M5C 2T2. Phone: (416) 978-4752; Fax: (416) 978-5310; EM:

[cyril.kendall@utoronto.ca](mailto:cyril.kendall@utoronto.ca)

**Manuscript Word Count: 3,932894**



1  
2  
3 **Number of Tables:** 3  
4

5 **Number of Figures:** 3  
6

7 **Number of References:** 59  
8

9 **Running Title:** Weight loss in hyperlipidemia on a vegan diet  
10

11 **Trial Registration:** #NCT00256516  
12

13 **Keywords:** weight loss, vegetable proteins, nuts, soy, vegan diet, hyperlipidemia  
14

15  
16  
17  
18  
19  
20 **Contributions**

21  
22 *Conception and design* - Jenkins, Wong, Kendall, Faulkner, Paul, Mukherjea, Krul, Singer  
23

24 *Acquisition of data* - Jenkins, Wong, Kendall, Esfahani, Ng, Leong  
25

26 *Analysis and interpretation of data* – Jenkins, Wong, Kendall, Vidgen  
27

28 *Drafting of the manuscript* – Jenkins, Wong  
29

30 *Critical revision of the manuscript for important intellectual content* – Jenkins, Wong, Kendall,  
31

32 Esfahani, Ng, Leong, Faulkner, Vidgen, Paul, Mukherjea, Krul, Singer  
33

34 *Statistical analysis* - Vidgen  
35

36 *Obtaining funding* – Jenkins, Kendall, Wong  
37

38 *Administrative, technical, or material support* – Wong, Kendall, Esfahani, Ng, Leong, Faulkner  
39

40 *Supervision* – Jenkins, Kendall, Wong, Singer  
41

42 *No additional contributions* - Paul, Mukherjea, Krul  
43  
44  
45  
46  
47  
48  
49  
50  
51  
52  
53  
54  
55  
56  
57  
58  
59  
60

## Abstract

**Objective:** Low-carbohydrate diets may be useful for weight loss. Diets high in vegetable proteins and oils may reduce the risk of coronary heart disease (CHD). The main objective was to determine the longer term effect of a diet that was both low-carbohydrate and plant-based on weight loss and LDL-C.

**Design, Setting, Participants:** A parallel design study of 39 overweight hyperlipidemic men and postmenopausal women conducted at a Canadian university-affiliated hospital nutrition research center from April 2005 to November 2006.

**Intervention:** Participants were advised to consume either a low-carbohydrate vegan diet or a high-carbohydrate lacto-ovo vegetarian diet for six-months after completing one-month metabolic (all foods provided) versions of these diets. The prescribed macronutrient intakes for the low- and high-carbohydrate diets were: 26% and 58% of energy from carbohydrate, 31% and 16% from protein and 43% and 25% from fat, respectively.

**Primary Outcome:** Change in body weight.

**Results:** Twenty-three participants (50% test, 68% control) completed the six-month ad libitum study. The approximate 4kg weight loss on the metabolic study was increased to -6.9kg on low-carbohydrate and -5.8kg on high-carbohydrate six-month ad libitum treatments (treatment difference [95% CI]: -1.1kg [-2.1, 0.0],  $P=0.047$ ). The relative LDL-C and triglyceride reductions were also greater on the low-carbohydrate treatment (treatment difference [95% CI]: -0.49mmol/L [-0.70, -0.28],  $P<0.001$  and -0.34mmol/L [-0.57, -0.11],  $P=0.005$ , respectively), as were the TC:HDL-C and apolipoprotein B:A1 ratios (-0.57 [-0.83, -0.32],  $P<0.001$  and -0.05 [-0.09, -0.02],  $P=0.003$ , respectively).

1  
2  
3 **Conclusions:** A self-selected low-carbohydrate vegan diet, containing increased protein and fat  
4  
5 from gluten and soy products, nuts, and vegetable oils, had lipid lowering advantages over a  
6  
7 high-carbohydrate, low-fat weight loss diet, thus improving heart disease risk factors.  
8  
9

10  
11  
12 **Trial Registration:** clinicaltrials.gov (<http://www.clinicaltrials.gov/>), #NCT00256516  
13  
14

15  
16  
17 **Abstract Word Count:** 273 (up to 300 allowed)  
18  
19  
20  
21  
22  
23  
24  
25  
26  
27  
28  
29  
30  
31  
32  
33  
34  
35  
36  
37  
38  
39  
40  
41  
42  
43  
44  
45  
46  
47  
48  
49  
50  
51  
52  
53  
54  
55  
56  
57  
58  
59  
60

## Article Summary

### Article Focus

- Low-carbohydrate diets may be useful for weight loss. Diets high in vegetable proteins and oils may reduce the risk of coronary heart disease (CHD).
- The objective of the randomized clinical trial was to determine the longer term effect of a diet that was both low-carbohydrate and plant-based on weight loss and LDL-C.
- We have already reported the effect of this dietary strategy in producing a difference of 8% in LDL-C reduction between calorie-restricted diets (60% of estimated calorie requirements) when all food was provided. We now report findings after these same participants continued on their respective diets for an additional 6 months, under self-selected conditions, in order to gain insights into the real life effectiveness of this diet.

### Key Messages

- By comparison with the high-carbohydrate diet, consumption of the low-carbohydrate diet containing vegetable proteins and oils was also associated with significantly reduced concentrations of LDL-C. This LDL-C reduction has not been reported for other low-carbohydrate diet studies in which a large part of the protein and fat originated from animal sources.
- The present study also demonstrated that consumption of a low-carbohydrate vegan diet resulted in modestly greater body weight reductions compared to a high-carbohydrate diet (7% versus 6% reductions, respectively) over a six-month ad libitum period.

- 1  
2  
3 | - The sustained reduction in LDL-C, associated with ~~only~~ a small incremental weight loss on  
4  
5  
6 | the 6-month self-selected diet, is a potentially important attribute of the diet in reducing long-  
7  
8 | term CHD risk  
9

### 12 **Strengths and Limitations of this Study**

14  
15 The study weaknesses include the relatively small sample size and the high dropout rate.

16  
17 | Nevertheless, ~~high dropout rates have been reported in similar dietary studies and~~ it is  
18  
19 | noteworthy that attrition rates were low in the metabolic study when all food was provided [1].  
20  
21

22 Food availability and preparation may therefore be important factors. For those who did  
23  
24 complete the study, however, there were benefits in weight loss and LDL-C reduction, an  
25  
26 additional 2% advantage in body weight reduction compared to the high-carbohydrate diet and a  
27  
28 13% drop in LDL-C for participants consuming a more plant-based low-carbohydrate diet.  
29  
30

31 The study's strength is that the prescribed hypocaloric diet was self-selected, meaning the results  
32  
33 are more in line with what can be expected under free-living conditions. The breadth of  
34  
35 application of the plant-based low-carbohydrate diet, however, remains to be determined, but it  
36  
37 may provide an option for some individuals for whom LDL-C reduction is an equal concern to  
38  
39 weight loss. If low-carbohydrate dietary options become more generally available the number of  
40  
41 individuals who will benefit is likely to increase.  
42  
43  
44  
45  
46  
47  
48  
49  
50  
51  
52  
53  
54  
55  
56  
57  
58  
59  
60

## Introduction

Many popular weight loss diets emphasize carbohydrate restriction (Atkins, Eddies, South Beach, Zone). Their success is determined by the level of compliance with the prescribed diets [2-7]. However, a high content of animal products, rich in saturated fat and cholesterol, may make conventional low-carbohydrate diets less appropriate for those with hypercholesterolemia [3 8]. Even during active weight loss, these high saturated fat diets do not lower serum LDL-C below baseline [3 8] and there is concern that if such diets continue to be eaten when weight loss has ceased, a more atherogenic blood lipid profile may result [9]. These concerns have prompted exploration of other weight loss strategies, but only modest reductions in LDL-C have been observed [10].

By contrast vegan diets significantly lower LDL-C [11]. Trials of vegan and vegetarian diets also reduce progression of coronary heart disease (CHD) [12] and improve diabetes control [13].

Plant food components such as vegetable proteins, vegetable oils, nuts and viscous fibers, reduce serum lipids in many studies [14-19] and may increase flow mediated vasodilatation [20-23].

Nuts, fiber and vegetarian diets in general, all reduce CHD and diabetes in cohort studies [24-29]. Finally, in cohort studies, low-carbohydrate diets, high in vegetable oils and proteins as opposed to animal products, reduce CHD events and diabetes incidence in women [30 31], while lower red meat intake reduces total, cardiovascular and cancer mortality [32]. Most recently a large randomized controlled trial confirmed the effect of nuts and increased vegetable oil (olive oil) intake in reducing cardiovascular events in the context of a Mediterranean diet [33].

In view of the apparent success of low-carbohydrate diets for weight loss and the demonstration that relatively high-carbohydrate vegetarian and vegan diets, and diets low in animal products, lower CHD risk factors [34-37], we designed a diet that combined both vegan and low-

1  
2  
3 carbohydrate elements to determine whether such a diet captured both the weight loss and CHD  
4 risk reduction advantages. We have already reported the effect of this dietary strategy in  
5 producing a difference of 8% in LDL-C reduction between calorie-restricted diets (60% of  
6 estimated calorie requirements) when all food was provided [1]. We now report findings after  
7 these same participants continued on their respective diets for an additional 6 months, under self-  
8 selected conditions, in order to gain insights into the real life effectiveness of this diet. The  
9 results of the metabolic (all foods provided) study have been reported previously and had  
10 demonstrated a CHD risk factor advantage, but with no greater weight loss than the control diet  
11 [1].  
12  
13  
14  
15  
16  
17  
18  
19  
20  
21  
22  
23  
24  
25  
26

## 27 **Methods**

### 28 **Participants**

29  
30 Forty-seven overweight participants, recruited by newspaper advertisement and hospital clinic  
31 notices, undertook the one-month metabolic first phase of the study (Figure 1) that has been  
32 previously reported [1]. At the start of the study, participants were given the option to participate  
33 in both the metabolic and ad libitum phases or only the metabolic phase. On completion of the  
34 metabolic phase, thirty-nine participants (19 control and 20 test participants) continued for an ad  
35 libitum six-month study and their data (n=39) were used in the final analysis (Table 1). The  
36 study was conducted at a Canadian university-affiliated hospital nutrition research center from  
37 April 2005 to November 2006. All participants had high normal to raised LDL-C levels  
38 (>3.4mmol/L at diagnosis) and a body mass index > 27 kg/m<sup>2</sup>. Details of the eligibility criteria  
39 have been previously reported [1]. After recruitment, the 11/39 participants who were taking  
40  
41  
42  
43  
44  
45  
46  
47  
48  
49  
50  
51  
52  
53  
54  
55  
56  
57  
58  
59  
60

1  
2  
3 lipid lowering medications discontinued their medications at least two weeks prior to starting and  
4  
5 for the study duration (Table 1).  
6  
7  
8  
9

## 10 **Study Protocol**

11  
12 The intervention was a randomized parallel study stratified by sex in which participants were  
13  
14 randomized to either low- or high-carbohydrate, calorie-reduced diets. The first month was the  
15  
16 previously reported metabolically controlled study [1]. For the following six-months, participants  
17  
18 continued on the diet to which they had been assigned as a self-selected (ad libitum) diet.  
19  
20

21 Anthropometric, blood pressure and blood lipid measurements were repeated at monthly  
22  
23 intervals. Insulin and HbA1c were measured at baseline and at the start and end of the ad libitum  
24  
25 treatment. Percentage body fat was measured at baseline and end of the ad libitum treatment by  
26  
27 bioelectrical impedance (Quantum II; RJL Systems, Clinton Township, Michigan). Seven-day  
28  
29 diet and exercise histories were recorded in the week prior to each monthly visit. These histories  
30  
31 were reviewed and discussed with the dietitian and appropriate dietary counselling was provided  
32  
33 to enhance adherence. The overall feeling of satiety for the previous week was assessed at each  
34  
35 study visit using a 9-point bipolar semantic scale, where -4 was extremely hungry, 0 was neutral,  
36  
37 and +4 was uncomfortably full [1 35]. No exercise advise was given during the study, but  
38  
39 alterations in exercise were allowed and recorded.  
40  
41  
42  
43  
44

45 The Ethics Committees of St. Michael's Hospital and the University of Toronto, and the  
46  
47 Therapeutic Products Directorate of Health Canada approved the study. Written informed  
48  
49 consent was obtained from the participants. The study's clinical trial registration number was  
50  
51 #NCT00256516.  
52  
53  
54  
55  
56  
57  
58  
59  
60



## Diets

As with the previous metabolic study, participants were encouraged to eat only 60% of their estimated caloric requirements in order to continue the body weight reduction started on their metabolic phase [38-40]. The prescribed test diet was a low-carbohydrate vegan diet containing 26% of calories from carbohydrate, 31% of calories from vegetable proteins and 43% from fat (primarily vegetable oils). Carbohydrate sources on the low-carbohydrate diet featured viscous fiber-containing foods (such as oats and barley) and low-starch vegetables (emphasizing okra and eggplant) for the relatively limited amount of carbohydrate allowed. The vegetable proteins were prescribed as gluten (54.8% of total protein), soy (23.0%), fruits and vegetables (8.7%), nuts (7.5%), and cereals (6.0%). Gluten was contained in the nut bread and wheat gluten (also called “seitan”) products. Soy protein was present in the form of burgers, ~~veggie bacon~~, deli slices, breakfast links, veggie bacon, tofu, and soy milks. Nuts included almonds, cashews, hazelnuts, macadamia, pecans, and pistachios. The fat sources were nuts (43.6% of total fat), vegetable oils (24.4%), soy products (18.5%), avocado (7.1%), cereals (2.7%), fruits and vegetables (2.3%), and seitan products (1.4%). Participants were able to purchase at the research center the “no” starch high protein nut bread and three of the seitan (wheat gluten) products used in the study which were not available in Canada. The control, high-carbohydrate lacto-ovo vegetarian diet (58% carbohydrate, 16% protein and 25% fat) emphasized whole wheat cereals and cereal fiber, as well as low-fat or skim milk dairy products and liquid egg substitute to reduce saturated fat and cholesterol intakes. These diets have been published previously [1].

Participants were given a copy of the menu plans that outlined the food items and amounts prescribed during the metabolic phase. These menu plans served as a reference during the ad

1  
2  
3 libitum phase. Furthermore, participants were given an exchange list of the items prescribed on  
4  
5 the menu plan. The goal was to enhance adherence.  
6  
7

8 Self-taring electronic scales (My Weigh Scales, Vancouver, BC or Tanita Corporation, Arlington  
9  
10 Heights, IL) were provided to all participants and they were instructed to weigh all food items  
11  
12 while recording the seven-day food diary in the week prior to monthly clinic visits. Adherence to  
13  
14 the three principal cholesterol-lowering components [vegetable proteins (soy and gluten), nuts,  
15  
16 and viscous fibers] of the low-carbohydrate diet was assessed from the completed monthly  
17  
18 seven-day food records. The amount of each component provided during the metabolic phase  
19  
20 remained the same as that prescribed during the ad libitum phase.  
21  
22  
23

24 Neither the dietitians nor participants could be blinded, but equal emphasis was placed on the  
25  
26 potential importance for health of both diets. The analytical technicians were blinded to diet  
27  
28 allocation, as was the statistician, up to analysis of the primary outcome. Participants were  
29  
30 offered no financial compensation for participation in the study.  
31  
32  
33  
34  
35

### 36 **Analyses**

37  
38 The analytical techniques have been reported previously [1]. Serum was analyzed in the J. Alick  
39  
40 Little Lipid Research Laboratory [35]. ~~and~~-LDL-C (in mmol/L) was calculated by the method of  
41  
42 Friedewald et al. [1]. using all data including the two participants who had baseline and during  
43  
44 study triglyceride values above 4.5 mmol/L (3 values on low-carbohydrate diet and 2 on high-  
45  
46 carbohydrate diet, maximum triglyceride < 6.5 mmol/L) (exclusion of these two individuals did  
47  
48 not alter the findings). The methods for analyzing apolipoproteins A1 and B, high sensitivity C-  
49  
50 reactive protein (hs-CRP), blood glucose, insulin, HbA1c, and homeostasis model assessment –  
51  
52  
53 insulin resistance model (HOMA-IR) have been described previously [1]. Exercise data were  
54  
55  
56  
57  
58  
59  
60

1  
2  
3 calculated as metabolic equivalents (METs) [41]. The absolute 10-year CHD risk score was  
4  
5 calculated using the Framingham risk equation [42].  
6

7  
8 Diets were assessed for macronutrients, fatty acids, cholesterol and fiber using a computer  
9  
10 program based on the USDA database [43] and developed in our laboratory to allow the addition  
11  
12 of the macronutrient content of study foods obtained from food labels or directly from food  
13  
14 manufacturers. The nutritional profiles of the diets were calculated from the 7-day food records  
15  
16 completed once a month throughout the study and mean intakes are presented.  
17  
18

19  
20 Adherence ~~with~~to the three principal cholesterol-lowering components [vegetable proteins (soy  
21  
22 and gluten), nuts, and viscous fibers] of the low-carbohydrate diet was estimated from the 7-day  
23  
24 food records. Each component was assessed as contributing 1/3 or by applying 33.3% to the  
25  
26 LDL-C reduction. When the amount consumed was equivalent to the amount prescribed a 33.3%  
27  
28 compliance would be recorded for that component. adherence factor to the recorded intake for  
29  
30 each of the three main components. The sum of the three components if consumed as prescribed  
31  
32 would equal 100% adherence.  
33  
34  
35  
36  
37  
38

### 39 **Statistical Analyses**

40  
41 Results are expressed as means  $\pm$  SEM or 95% confidence intervals (CIs). Time zero was used as  
42  
43 the baseline and refers to the pre-metabolic study baseline [1]. Treatment differences in physical  
44  
45 and biochemical measures were assessed using all available data from the 39 participants and a  
46  
47 repeated measures mixed model accounting for time of assessment (SAS 9.2) [44] in the Tables  
48  
49 (Table 2 and 3) and the Results. The response variable was change from baseline, with diet and  
50  
51 week as fixed effects and subject ID nested in diet. There was no adjustment for baseline. Any  
52  
53  
54  
55  
56  
57  
58  
59  
60

1  
2  
3 participant who started the ad libitum treatment was included in the analysis (N=39). The  
4  
5 completer analysis included the 23 participants who completed the study (Figure 1).  
6  
7

8 Multiple imputation (taking the mean of 5 sets of randomly imputed values) was used to present  
9  
10 baseline and treatment values in the Tables (2 and 3) and Figures (2 and 3) by generating data for  
11  
12 those who dropped out or had missing values [44].  
13  
14

## 17 Results

18  
19 Compliance with the major dietary components [vegetable proteins (soy and gluten), nuts, and  
20  
21 viscous fibers] was 33.6% or one-third of that prescribed during the metabolic phase (Table 2).  
22  
23 Saturated fat intakes were similar on both treatments whereas intake of monounsaturated fats,  
24  
25 vegetable proteins, and soy protein were significantly higher on the low-carbohydrate diet (Table  
26  
27 2). Available carbohydrate intake was significantly lower on the low-carbohydrate diet (Table 2).  
28  
29 The attrition rate was 50% (10/20) on the low-carbohydrate and 32% (6/19) on the high-  
30  
31 carbohydrate (Figure 1), this equates to a total attrition rate of 41% (16/39). The number of  
32  
33 participants who did not complete the study (including dropouts and withdrawals) did not differ  
34  
35 between treatments. Three participants were withdrawn by the study physician due to failure to  
36  
37 attain LDL-C targets on the low-carbohydrate diet (mean LDL-C = 5.24mmol/L) and one subject  
38  
39 on the high-carbohydrate diet (LDL-C = 7.78mmol/L). Participants on the low-carbohydrate diet  
40  
41 tended to have larger reductions in body weight over time (Figure 2). The weight loss from  
42  
43 baseline to the end of the 6-month ad libitum treatment was -6.9kg [95% CI, -7.7, -6.1] on the  
44  
45 low-carbohydrate and -5.8kg [95% CI, -6.6, -5.1] on the control diet with a significant difference  
46  
47 between groups (treatment difference [95% CI]: -1.1kg [-2.1, 0.0]; P=0.047) (Table 3). The final  
48  
49 reduction in BMI was also greater on the low-carbohydrate versus high-carbohydrate diet  
50  
51  
52  
53  
54  
55  
56  
57  
58  
59  
60

1  
2  
3 (treatment difference [95% CI]:  $-0.4\text{kg/m}^2$  [-0.8, 0.0];  $P=0.039$ ) (Table 3). Among the  
4  
5 completers, there were numerically larger differences between treatments for both body weight  
6  
7 and BMI (treatment difference [95% CI]:  $-1.8\text{ kg}$  [-3.0, -0.6];  $P=0.004$  and  $-0.7\text{ kg/m}^2$  [-1.1, -  
8  
9 0.2];  $P=0.004$ , respectively).

10  
11  
12 There was a relative increase in recorded exercise by the high-carbohydrate diet participants,  
13  
14 whereas there was no relative change in the low-carbohydrate participants (treatment difference  
15  
16 [95% CI]:  $-9.3$  [-16.4, -2.2] METs;  $P=0.012$ ), but this was not reflected in a greater weight loss  
17  
18 (Table 3). There were no treatment differences in percent body fat, waist circumference or satiety  
19  
20 (Table 3). There were no treatment differences in percent body fat, waist circumference or satiety  
21  
22 (Table 3).  
23

## 24 25 26 27 **Lipids**

28  
29 At the end of the study, the reduction on the low-carbohydrate versus high-carbohydrate diet was  
30  
31 greater for LDL-C (treatment difference [95% CI]:  $-0.49\text{mmol/L}$  [-0.70, -0.28];  $P<0.001$ , for TC  
32  
33 ( $-0.62\text{mmol/L}$  [-0.86, -0.37];  $P<0.001$ , for TC:HDL-C  $-0.57$  [-0.83, -0.32];  $P<0.001$ , for LDL-  
34  
35 C:HDL-C ( $-0.42$  [-0.60, -0.24];  $P<0.001$ , and for triglycerides ( $-0.34\text{mmol/L}$  [-0.57, -0.11];  
36  
37  $P=0.005$ ). No treatment difference was seen in HDL-C (Table 3). A similar pattern was observed  
38  
39 in the completers. The treatment difference was numerically larger for LDL-C ( $-0.60\text{mmol/L}$  [-  
40  
41 0.84, -0.36];  $P<0.0001$ ), TC ( $-0.73\text{mmol/L}$  [-1.00, -0.45];  $P<0.0001$ ), TC:HDL-C ( $-0.68$  [-0.97, -  
42  
43 0.39];  $P<0.0001$ ), and LDL-C:HDL-C ( $-0.53$  [-0.73, -0.32];  $P<0.0001$ ). Values for LDL-C and  
44  
45 the TC:HDL-C ratio were consistently lower in participants on the low-carbohydrate diet  
46  
47 throughout the study while HDL-C values were not different from baseline (Figure 3 A-C).  
48  
49  
50  
51  
52

## 53 54 55 **Apolipoproteins**

1  
2  
3 ApoB and the ApoB:A1 ratio were reduced more on the low- versus the high-carbohydrate diet  
4 at the end of the study (treatment different [95% CI]: -0.11g/L [-0.16, -0.06]; P<0.001 and -0.05  
5 [-0.09, -0.02]; P=0.003, respectively) (Table 3). No significant difference between the diets was  
6  
7  
8 observed for ApoA1 concentrations. The pattern of change in the apolipoproteins in the  
9  
10 completers reflected the changes seen in the whole group. Figure 3D and 3F show that the low-  
11  
12 carbohydrate diet resulted in lower apoB and ApoB:ApoA1 ratios relative to baseline over the  
13  
14 course of the study.  
15  
16  
17  
18  
19  
20  
21

### 22 **C-Reactive Protein, HbA1c, Blood Glucose, Serum Insulin, Insulin Resistance and Blood** 23 24 **Pressure**

25  
26 Both treatments reduced hs-CRP with no difference between treatments (Table 3). HbA1c,  
27  
28 fasting blood glucose, insulin, and insulin resistance (calculated using the HOMA model) fell  
29  
30 similarly on both treatments during the course of the study (Table 3). Systolic and diastolic blood  
31  
32 pressure decreased similarly with no treatment differences (Table 3). The completers also failed  
33  
34 to show a difference between treatments.  
35  
36  
37  
38  
39  
40

### 41 **Calculated CHD Risk**

42  
43 The low-carbohydrate diet significantly reduced the calculated 10-year CHD risk relative to the  
44  
45 high-carbohydrate diet (2% [-2, -1]; P<0.001) (Table 3). A reduced CHD risk on the low-  
46  
47 carbohydrate diet was also observed in the completers (2% [-3, -1]; P<0.001).  
48  
49  
50  
51  
52

### 53 **Adverse Events**

54  
55 No serious adverse events or events that involved hospitalisation occurred during the study.  
56  
57  
58  
59  
60

## Discussion

The present study demonstrated that consumption of a low-carbohydrate vegan diet resulted in a modestly greater body weight reduction compared to a high-carbohydrate diet (7% versus 6% reductions, respectively) over a six-month ad libitum period. These reductions were similar to those reported for low-carbohydrate “Atkins-like” diets [2 3 6 10]. However by comparison with the high-carbohydrate diet, consumption of the low-carbohydrate diet containing vegetable proteins and oils was also associated with significantly reduced concentrations of LDL-C. This LDL-C reduction has not been reported for other low-carbohydrate diet studies in which a large part of the protein and fat originated from animal sources and in which no significant LDL-C reductions were seen [2-6 8]. The sustained reduction in LDL-C, associated with ~~only~~ a small incremental weight loss on the 6-month self-selected diet, is a potentially important attribute of the diet in reducing long-term CHD risk [45 46]. Furthermore, as seen in the present study, a low-carbohydrate diet, in which vegetable fat and protein options were encouraged, demonstrated a larger reduction in the TC:HDL-C ratio than that reported at 6 months in weight loss studies employing either a Mediterranean or a high-carbohydrate diet [10].

The majority of studies undertaken to date have been 6 months to one year in duration [2-6 47] with more recent studies of up to 2 years [2 8] ~~and, as with the present study, a number of these studies had a high dropout rate [2 3 5 47].~~ The high dropout rate in the present 6-month study did not prevent identification of significant LDL-C and body weight differences in the intent-to-treat analysis (using all available data). However, the completer data demonstrated an even larger treatment difference in LDL-C favoring the low-carbohydrate treatment. Those on the low-carbohydrate diet showed overall adherence to the major dietary components [vegetable proteins

1  
2  
3 (soy and gluten), nuts, and viscous fibers] at 33.6% of that provided during the metabolic phase  
4  
5  
6 [1]. This adherence is similar to the 43.3% seen with the dietary portfolio in the comparison of  
7  
8 the metabolic one month [35] and the ad libitum six month studies [48]. In this study,  
9  
10 ~~comparison also just under half~~ the LDL-C reduction on the low-carbohydrate metabolic month  
11 was also greater than that on the ad libitum 6 months, although the treatment differences were  
12 similar (13-14%) seen on the ad libitum compared to the metabolic study [35].  
13  
14  
15  
16  
17

18 The effect of low-carbohydrate diets on CHD events has not been assessed in randomized  
19 controlled trials. Nevertheless, low-carbohydrate diets high in vegetable proteins and oils have  
20 been associated with a 30% reduced CHD risk and an 18% reduced incidence of diabetes in  
21 cohort studies [30 31]. The median interquartile difference in these studies between the first and  
22 10<sup>th</sup> decile for vegetable protein and monounsaturated fat (MUFA) intakes, as a marker of  
23 increased vegetable oil consumption, was 1.4% and 9.3% expressed as a percentage of total  
24 caloric intake [30]. These figures compare with an 8.2% and a 4.6% relative increase in  
25 vegetable protein and oil consumption from baseline on the Eco-Atkins diet compared to the  
26 control diet. The increases in MUFA were therefore seen in both studies. Recently a Spanish  
27 Mediterranean diet emphasizing increased nut or olive oil consumption, and so increasing  
28 monounsaturated fat intake by 2-3%, has been shown to significantly reduce cardiovascular  
29 events also by approximately 30% [33]. These data provide consistent support for the view that  
30 the Eco-Atkins approach would reduce CHD risk in the long term.  
31  
32  
33  
34  
35  
36  
37  
38  
39  
40  
41  
42  
43  
44  
45  
46  
47

48 The present diet, while lowering LDL-C by 9%, did not result in any significant depression of  
49 HDL-C. Lowering LDL-C while maintaining HDL-C would be expected to reduce CHD risk [45  
50 46]. Similarly, reductions in ApoB and the ApoB:A1 ratio were also observed in the present  
51 study. These findings further support the potential CHD benefit that this weight loss diet may  
52  
53  
54  
55  
56  
57  
58  
59  
60



1  
2  
3 have [49-51]. It has also been claimed that apolipoproteins may be stronger predictors of CHD  
4  
5 events than conventional lipid variables [52-54].  
6  
7

8 In contrast to the metabolic study, the reductions in systolic and diastolic blood pressure were not  
9  
10 significant between the low- and high-carbohydrate diets. Similarly, hs-CRP was unchanged  
11  
12 between treatments, however, the level was significantly reduced with the low-carbohydrate diet  
13  
14 compared to baseline. Studies have shown that hs-CRP tended to be lowest on the diets  
15  
16 containing the highest proportion of carbohydrate [5]. Low glycemic index and low glycemic  
17  
18 load diets have also been associated with lower hs-CRP concentrations [55 56]. These  
19  
20 advantages of the higher carbohydrate diet may have reduced any hs-CRP difference between the  
21  
22 two diets in the present study.  
23  
24  
25

26 Soy-containing foods as well as nuts have cholesterol lowering effects [15 17 18 57 58] and may  
27  
28 explain the reduction in LDL-C. Viscous fiber in low starch vegetables and  $\beta$ -glucan in oats and  
29  
30 barley may also have contributed to the overall cholesterol lowering effect of the diet [9 14 45].  
31  
32 Furthermore, nuts and high fiber food consumption have been associated with lower body weight  
33  
34 [59].  
35  
36  
37

38 The study weaknesses include the relatively small sample size and the high dropout rate.

39  
40 Nevertheless, ~~high dropout rates have been reported in similar dietary studies and~~ it is  
41  
42 noteworthy that attrition rates were low in the metabolic study when all food was provided [1].  
43  
44

45 Food availability and preparation may therefore be important factors. Future studies will need to  
46  
47 focus on strategies to increase and maintain adherence, especially to the cholesterol lowering  
48  
49 components, which all bear US FDA health claims for cardiovascular disease risk reduction.  
50  
51

52 Furthermore, collaboration with food industry may be helpful in addressing concerns of  
53  
54 availability, variety, and ease of preparation. In retrospect, a simplified one page eating plan for  
55  
56  
57  
58  
59  
60

1  
2  
3 breakfast, lunch, and dinner with a number of options and amounts for each meal, as we have  
4 used in our dietary portfolio studies, might also be helpful [48]. For those who did complete the  
5 study, however, there were benefits in weight loss and LDL-C reduction, an additional 2%  
6 advantage in body weight reduction compared to the high-carbohydrate diet and a 13% drop in  
7 LDL-C for participants consuming a more plant-based low-carbohydrate diet. Unfortunately it  
8 was not possible to predict who would complete the diet based on pre-study data or changes  
9 observed during the metabolic phase.  
10  
11  
12  
13  
14  
15  
16  
17  
18

19 The study's strength is that the prescribed hypocaloric diet was self-selected, meaning the results  
20 are more in line with what can be expected under free-living conditions. The breadth of  
21 application of the plant-based low-carbohydrate diet, however, remains to be determined, but it  
22 may provide an option for some individuals for whom LDL-C reduction is an equal concern to  
23 weight loss. If low-carbohydrate dietary options become more generally available the number of  
24 individuals who will benefit is likely to increase.  
25  
26  
27  
28  
29  
30  
31  
32  
33

34 We conclude that a weight loss diet which reduced carbohydrate in exchange for increased  
35 intakes of vegetable sources of protein, such as gluten, soy and nuts, together with vegetable oils  
36 offers an opportunity to improve both LDL-C and body weight, both being risk factors for CHD.  
37 Further trials are warranted to evaluate low-carbohydrate diets, including more plant-based low-  
38 carbohydrate diets, on CHD risk factors and ultimately on CHD.  
39  
40  
41  
42  
43  
44  
45  
46  
47  
48  
49  
50  
51  
52  
53  
54  
55  
56  
57  
58  
59  
60

## Acknowledgements

We thank all the study participants for their attention to detail and enthusiasm.

Dr. Jenkins, together with those responsible for analysis and interpretation of data, had full access to all the data in the study and takes responsibility for the integrity of the data and the accuracy of the data analysis.

## Sources of Funding

This study was supported by Solae, LLC; Loblaw Companies Limited, and the Canada Research Chair Program of the Federal Government of Canada. Dr. Wong was a recipient of a Canadian Institutes of Health Research (CIHR) Doctoral Research Award, and is now a holder of a CIHR Randomized Controlled Trials – Mentoring Program Training Grant.

## Role of the Sponsors

None of the funding organizations or sponsors played any significant role in the design and conduct of the study, in the collection, management, analysis, and interpretation of the data, or in the preparation, or approval of the manuscript. However, the named co-authors from Solae LLC reviewed the manuscript.

## Disclosures

Dr. Jenkins has served on the Scientific Advisory Board of Sanitarium Company, Agri-Culture and Agri-Food Canada (AAFC), Canadian Agriculture Policy Institute (CAPI), California Strawberry Commission, Loblaw Supermarket, Herbal Life International, Nutritional Fundamental for Health, Pacific Health Laboratories, Metagenics, Bayer Consumer Care, Orafti,

1  
2  
3 Dean Foods, Kellogg's, Quaker Oats, Procter & Gamble, Coca-Cola, NuVal Griffin Hospital,  
4  
5 Abbott, Pulse Canada, Saskatchewan Pulse Growers, and Canola Council of Canada; received  
6  
7 honoraria for scientific advice from Sanitarium Company, Orafti, the Almond Board of  
8  
9 California, the American Peanut Council, International Tree Nut Council Nutrition Research and  
10  
11 Education Foundation and the Peanut Institute, Herbal Life International, Pacific Health  
12  
13 Laboratories, Nutritional Fundamental for Health, Barilla, Metagenics, Bayer Consumer Care,  
14  
15 Unilever Canada and Netherlands, Solae LLC, Oldways, Kellogg's, Quaker Oats, Procter &  
16  
17 Gamble, Coca-Cola, NuVal Griffin Hospital, Abbott, Canola Council of Canada, Dean Foods,  
18  
19 California Strawberry Commission, Haine Celestial, Pepsi, and Alpro Foundation; has been on  
20  
21 the speakers panel for the Almond Board of California; received research grants from  
22  
23 Saskatchewan Pulse Growers, the Agricultural Bioproducts Innovation Program (ABIP) through  
24  
25 the Pulse Research Network (PURENet), Advanced Food Materials Network (AFMNet),  
26  
27 Loblaw, Unilever, Barilla, Almond Board of California, Coca-Cola, Solae LLC, Haine Celestial,  
28  
29 Sanitarium Company, Orafti, International Tree Nut Council Nutrition Research and Education  
30  
31 Foundation and the Peanut Institute, the Canola and Flax Councils of Canada, Calorie Control  
32  
33 Council, Canadian Institutes of Health Research, Canada Foundation for Innovation, and the  
34  
35 Ontario Research Fund; and received travel support to meetings from the Solae LLC, Sanitarium  
36  
37 Company, Orafti, AFMNet, Coca-Cola, The Canola and Flax Councils of Canada, Oldways  
38  
39 Preservation Trust, Kellogg's, Quaker Oats, Griffin Hospital, Abbott Laboratories, Dean Foods,  
40  
41 the California Strawberry Commission, American Peanut Council, Herbal Life International,  
42  
43 Nutritional Fundamental for Health, Metagenics, Bayer Consumer Care, AAFC, CAPI, Pepsi,  
44  
45 Almond Board of California, Unilever, Alpro Foundation, International Tree Nut Council,  
46  
47 Barilla, Pulse Canada, and the Saskatchewan Pulse Growers. Dr Jenkins' wife is a director of  
48  
49  
50  
51  
52  
53  
54  
55  
56  
57  
58  
59  
60

1  
2  
3 Glycemic Index Laboratories, Toronto, Ontario, Canada. Dr. Kendall reported being on speakers  
4  
5 bureaus for Almond Board of California, Solae LLC, and Unilever; and receiving research grants  
6  
7  
8 from CIHR, Unilever, Solae LLC, Loblaw Brands Ltd, International Tree Nut Council, and  
9  
10 Almond Board of California. Mr. Vidgen has received partial salary funding from research  
11  
12 grants provided by Unilever, Loblaws, and the Almond Board of California. Drs. Paul,  
13  
14 Mukherjea, and Krul are employees of Solae, LLC.  
15  
16  
17  
18  
19  
20  
21  
22  
23  
24  
25  
26  
27  
28  
29  
30  
31  
32  
33  
34  
35  
36  
37  
38  
39  
40  
41  
42  
43  
44  
45  
46  
47  
48  
49  
50  
51  
52  
53  
54  
55  
56  
57  
58  
59  
60

## References

1. Jenkins DJ, Wong JM, Kendall CW, et al. The effect of a plant-based low-carbohydrate ("Eco-Atkins") diet on body weight and blood lipid concentrations in hyperlipidemic subjects. *Arch Intern Med* 2009;**169**(11):1046-54 doi: 10.1001/archinternmed.2009.115[published Online First: Epub Date].
2. Samaha FF, Iqbal N, Seshadri P, et al. A low-carbohydrate as compared with a low-fat diet in severe obesity. *N Engl J Med* 2003;**348**(21):2074-81
3. Foster GD, Wyatt HR, Hill JO, et al. A randomized trial of a low-carbohydrate diet for obesity. *N Engl J Med* 2003;**348**(21):2082-90
4. Stern L, Iqbal N, Seshadri P, et al. The effects of low-carbohydrate versus conventional weight loss diets in severely obese adults: one-year follow-up of a randomized trial. *Ann Intern Med* 2004;**140**(10):778-85
5. Dansinger ML, Gleason JA, Griffith JL, et al. Comparison of the Atkins, Ornish, Weight Watchers, and Zone diets for weight loss and heart disease risk reduction: a randomized trial. *JAMA* 2005;**293**(1):43-53
6. Gardner CD, Kiazand A, Alhassan S, et al. Comparison of the Atkins, Zone, Ornish, and LEARN diets for change in weight and related risk factors among overweight premenopausal women: the A TO Z Weight Loss Study: a randomized trial. *JAMA* 2007;**297**(9):969-77
7. Sacks FM, Bray GA, Carey VJ, et al. Comparison of weight-loss diets with different compositions of fat, protein, and carbohydrates. *N Engl J Med* 2009;**360**(9):859-73 doi: 10.1056/NEJMoa0804748[published Online First: Epub Date].

- 1  
2  
3 8. Foster GD, Wyatt HR, Hill JO, et al. Weight and metabolic outcomes after 2 years on a low-  
4  
5 carbohydrate versus low-fat diet: a randomized trial. *Ann Intern Med* 2010;**153**(3):147-57  
6  
7 doi: 10.1059/0003-4819-153-3-201008030-00005[published Online First: Epub Date].  
8  
9
- 10 9. Anderson JW, Randles KM, Kendall CW, et al. Carbohydrate and fiber recommendations for  
11  
12 individuals with diabetes: a quantitative assessment and meta-analysis of the evidence.  
13  
14 *Journal of the American College of Nutrition* 2004;**23**(1):5-17  
15  
16
- 17 10. Shai I, Schwarzfuchs D, Henkin Y, et al. Weight loss with a low-carbohydrate,  
18  
19 Mediterranean, or low-fat diet. *N Engl J Med* 2008;**359**(3):229-41  
20  
21
- 22 11. Sacks FM, Ornish D, Rosner B, et al. Plasma lipoprotein levels in vegetarians. The effect of  
23  
24 ingestion of fats from dairy products. *JAMA* 1985;**254**(10):1337-41  
25  
26
- 27 12. Ornish D, Brown SE, Scherwitz LW, et al. Can lifestyle changes reverse coronary heart  
28  
29 disease? The Lifestyle Heart Trial. *Lancet* 1990;**336**(8708):129-33  
30  
31
- 32 13. Barnard ND, Cohen J, Jenkins DJ, et al. A low-fat vegan diet improves glycemic control and  
33  
34 cardiovascular risk factors in a randomized clinical trial in individuals with type 2  
35  
36 diabetes. *Diabetes care* 2006;**29**(8):1777-83  
37  
38
- 39 14. Jenkins DJ, Newton C, Leeds AR, et al. Effect of pectin, guar gum, and wheat fibre on  
40  
41 serum-cholesterol. *Lancet* 1975;**1**(7916):1116-7  
42  
43
- 44 15. Sirtori CR, Agradi E, Conti F, et al. Soybean-protein diet in the treatment of type-II  
45  
46 hyperlipoproteinaemia. *Lancet* 1977;**1**(8006):275-7  
47  
48
- 49 16. Grundy SM. Comparison of monounsaturated fatty acids and carbohydrates for lowering  
50  
51 plasma cholesterol. *N Engl J Med* 1986;**314**(12):745-8  
52  
53
- 54 17. Anderson JW, Johnstone BM, Cook-Newell ME. Meta-analysis of the effects of soy protein  
55  
56 intake on serum lipids. *N Engl J Med* 1995;**333**(5):276-82  
57  
58  
59  
60

- 1  
2  
3  
4  
5  
6  
7  
8  
9  
10  
11  
12  
13  
14  
15  
16  
17  
18  
19  
20  
21  
22  
23  
24  
25  
26  
27  
28  
29  
30  
31  
32  
33  
34  
35  
36  
37  
38  
39  
40  
41  
42  
43  
44  
45  
46  
47  
48  
49  
50  
51  
52  
53  
54  
55  
56  
57  
58  
59  
60
18. Kris-Etherton PM, Yu-Poth S, Sabate J, et al. Nuts and their bioactive constituents: effects on serum lipids and other factors that affect disease risk. *Am J Clin Nutr* 1999;**70**(3 Suppl):504S-11S
  19. Sabate J, Oda K, Ros E. Nut consumption and blood lipid levels: a pooled analysis of 25 intervention trials. *Arch Intern Med* 2010;**170**(9):821-7 doi: 10.1001/archinternmed.2010.79[published Online First: Epub Date].
  20. Ros E, Nunez I, Perez-Heras A, et al. A walnut diet improves endothelial function in hypercholesterolemic subjects: a randomized crossover trial. *Circulation* 2004;**109**(13):1609-14 doi: 10.1161/01.CIR.0000124477.91474.FF[published Online First: Epub Date].
  21. Zhao G, Etherton TD, Martin KR, et al. Dietary alpha-linolenic acid reduces inflammatory and lipid cardiovascular risk factors in hypercholesterolemic men and women. *J Nutr* 2004;**134**(11):2991-7
  22. West SG, Krick AL, Klein LC, et al. Effects of diets high in walnuts and flax oil on hemodynamic responses to stress and vascular endothelial function. *Journal of the American College of Nutrition* 2010;**29**(6):595-603
  23. Ma Y, Njike VY, Millet J, et al. Effects of walnut consumption on endothelial function in type 2 diabetic subjects: a randomized controlled crossover trial. *Diabetes care* 2010;**33**(2):227-32 doi: 10.2337/dc09-1156[published Online First: Epub Date].
  24. Appleby PN, Thorogood M, Mann JI, et al. The Oxford Vegetarian Study: an overview. *Am J Clin Nutr* 1999;**70**(3 Suppl):525S-31S
  25. Fraser GE. *Diet, life expectancy, and chronic disease: studies of Seventh-Day Adventists and other vegetarians*. New York: Oxford University Press, 2003.



- 1  
2  
3 26. Pereira MA, O'Reilly E, Augustsson K, et al. Dietary fiber and risk of coronary heart disease:  
4 a pooled analysis of cohort studies. *Arch Intern Med* 2004;**164**(4):370-6  
5  
6  
7  
8 27. Li TY, Brennan AM, Wedick NM, et al. Regular consumption of nuts is associated with a  
9 lower risk of cardiovascular disease in women with type 2 diabetes. *J Nutr*  
10 2009;**139**(7):1333-8 doi: 10.3945/jn.108.103622[published Online First: Epub Date].  
11  
12  
13 28. Kris-Etherton PM, Hu FB, Ros E, et al. The role of tree nuts and peanuts in the prevention of  
14 coronary heart disease: multiple potential mechanisms. *J Nutr* 2008;**138**(9):1746S-51S  
15  
16  
17 29. Pan A, Sun Q, Manson JE, et al. Walnut consumption is associated with lower risk of type 2  
18 diabetes in women. *J Nutr* 2013;**143**(4):512-8 doi: 10.3945/jn.112.172171[published  
19 Online First: Epub Date].  
20  
21  
22 30. Halton TL, Willett WC, Liu S, et al. Low-carbohydrate-diet score and the risk of coronary  
23 heart disease in women. *N Engl J Med* 2006;**355**(19):1991-2002  
24  
25  
26 31. Halton TL, Liu S, Manson JE, et al. Low-carbohydrate-diet score and risk of type 2 diabetes  
27 in women. *Am J Clin Nutr* 2008;**87**(2):339-46 doi: 87/2/339 [pii][published Online First:  
28 Epub Date].  
29  
30  
31 32. Pan A, Sun Q, Bernstein AM, et al. Red meat consumption and mortality: results from 2  
32 prospective cohort studies. *Archives of internal medicine* 2012;**172**(7):555-63 doi:  
33 10.1001/archinternmed.2011.2287[published Online First: Epub Date].  
34  
35  
36 33. Estruch R, Ros E, Salas-Salvado J, et al. Primary prevention of cardiovascular disease with a  
37 Mediterranean diet. *N Engl J Med* 2013;**368**(14):1279-90 doi:  
38 10.1056/NEJMoa1200303[published Online First: Epub Date].  
39  
40  
41 34. Sacks FM, Kass EH. Low blood pressure in vegetarians: effects of specific foods and  
42 nutrients. *Am J Clin Nutr* 1988;**48**(3 Suppl):795-800  
43  
44  
45  
46  
47  
48  
49  
50  
51  
52  
53  
54  
55  
56  
57  
58  
59  
60

- 1  
2  
3  
4 35. Jenkins DJ, Kendall CW, Marchie A, et al. Effects of a dietary portfolio of cholesterol-  
5  
6 lowering foods vs lovastatin on serum lipids and C-reactive protein. JAMA  
7  
8 2003;**290**(4):502-10  
9
- 10 36. Appel LJ, Sacks FM, Carey VJ, et al. Effects of protein, monounsaturated fat, and  
11  
12 carbohydrate intake on blood pressure and serum lipids: results of the OmniHeart  
13  
14 randomized trial. JAMA 2005;**294**(19):2455-64  
15  
16
- 17 37. Gardner CD, Coulston A, Chatterjee L, et al. The effect of a plant-based diet on plasma lipids  
18  
19 in hypercholesterolemic adults: a randomized trial. Ann Intern Med 2005;**142**(9):725-33  
20  
21
- 22 38. Harris JA, Benedict FG. *A biometric study of basal metabolism in man*. Washington, DC:  
23  
24 Carnegie Institute of Washington, 1919 (Publication no. 279.).  
25  
26
- 27 39. Shetty PS, Henry CJ, Black AE, et al. Energy requirements of adults: an update on basal  
28  
29 metabolic rates (BMRs) and physical activity levels (PALs). Eur J Clin Nutr 1996;**50**  
30  
31 **Suppl 1**:S11-23  
32  
33
- 34 40. Pereira MA, Swain J, Goldfine AB, et al. Effects of a low-glycemic load diet on resting  
35  
36 energy expenditure and heart disease risk factors during weight loss. JAMA  
37  
38 2004;**292**(20):2482-90  
39  
40
- 41 41. Ainsworth BE, Haskell WL, Leon AS, et al. Compendium of physical activities:  
42  
43 classification of energy costs of human physical activities. Med Sci Sports Exerc  
44  
45 1993;**25**(1):71-80  
46  
47
- 48 42. Anderson KM, Wilson PW, Odell PM, et al. An updated coronary risk profile. A statement  
49  
50 for health professionals. Circulation 1991;**83**(1):356-62  
51  
52
- 53 43. USDA Nutrient Database for Standard Reference, Release 19. Nutrient Data Laboratory  
54  
55 Home Page: U.S. Department of Agriculture, Agricultural Research Service, 2006.  
56  
57  
58  
59  
60

- 1
- 2
- 3 44. SAS Institute. SAS/STAT User's Guide (ed 9.2) [program]. Cary, NC: SAS Institute, 2008.
- 4
- 5
- 6 45. Executive Summary of The Third Report of The National Cholesterol Education Program
- 7
- 8 (NCEP) Expert Panel on Detection, Evaluation, And Treatment of High Blood
- 9
- 10 Cholesterol In Adults (Adult Treatment Panel III). JAMA 2001;**285**(19):2486-97
- 11
- 12
- 13 46. Grundy SM, Cleeman JI, Merz CN, et al. Implications of recent clinical trials for the
- 14
- 15 National Cholesterol Education Program Adult Treatment Panel III guidelines.
- 16
- 17 Circulation 2004;**110**(2):227-39
- 18
- 19
- 20 47. Westman EC, Yancy WS, Edman JS, et al. Effect of 6-month adherence to a very low
- 21
- 22 carbohydrate diet program. Am J Med 2002;**113**(1):30-6
- 23
- 24
- 25 48. Jenkins DJ, Jones PJ, Lamarche B, et al. Effect of a dietary portfolio of cholesterol-lowering
- 26
- 27 foods given at 2 levels of intensity of dietary advice on serum lipids in hyperlipidemia: a
- 28
- 29 randomized controlled trial. JAMA 2011;**306**(8):831-9 doi:
- 30
- 31 10.1001/jama.2011.1202[published Online First: Epub Date].
- 32
- 33
- 34 49. Gotto AM, Jr., Whitney E, Stein EA, et al. Relation between baseline and on-treatment lipid
- 35
- 36 parameters and first acute major coronary events in the Air Force/Texas Coronary
- 37
- 38 Atherosclerosis Prevention Study (AFCAPS/TexCAPS). Circulation 2000;**101**(5):477-84
- 39
- 40
- 41 50. Sniderman AD, Furberg CD, Keech A, et al. Apolipoproteins versus lipids as indices of
- 42
- 43 coronary risk and as targets for statin treatment. Lancet 2003;**361**(9359):777-80
- 44
- 45
- 46 51. Yusuf S, Hawken S, Ounpuu S, et al. Effect of potentially modifiable risk factors associated
- 47
- 48 with myocardial infarction in 52 countries (the INTERHEART study): case-control
- 49
- 50 study. Lancet 2004;**364**(9438):937-52
- 51
- 52
- 53
- 54
- 55
- 56
- 57
- 58
- 59
- 60

- 1  
2  
3  
4  
5  
6  
7  
8  
9  
10  
11  
12  
13  
14  
15  
16  
17  
18  
19  
20  
21  
22  
23  
24  
25  
26  
27  
28  
29  
30  
31  
32  
33  
34  
35  
36  
37  
38  
39  
40  
41  
42  
43  
44  
45  
46  
47  
48  
49  
50  
51  
52  
53  
54  
55  
56  
57  
58  
59  
60
52. McQueen MJ, Hawken S, Wang X, et al. Lipids, lipoproteins, and apolipoproteins as risk factors of myocardial infarction in 52 countries (the INTERHEART study): a case-control study. *Lancet* 2008;**372**:224-33
53. Contois JH, McConnell JP, Sethi AA, et al. Apolipoprotein B and cardiovascular disease risk: position statement from the AACC Lipoproteins and Vascular Diseases Division Working Group on Best Practices. *Clin Chem* 2009;**55**(3):407-19 doi: 10.1373/clinchem.2008.118356[published Online First: Epub Date].
54. Sniderman AD, Williams K, Contois JH, et al. A meta-analysis of low-density lipoprotein cholesterol, non-high-density lipoprotein cholesterol, and apolipoprotein B as markers of cardiovascular risk. *Circ Cardiovasc Qual Outcomes* 2011;**4**(3):337-45 doi: 10.1161/CIRCOUTCOMES.110.959247[published Online First: Epub Date].
55. Liu S, Manson JE, Buring JE, et al. Relation between a diet with a high glycemic load and plasma concentrations of high-sensitivity C-reactive protein in middle-aged women. *Am J Clin Nutr* 2002;**75**(3):492-8
56. Wolever TM, Gibbs AL, Mehling C, et al. The Canadian Trial of Carbohydrates in Diabetes (CCD), a 1-y controlled trial of low-glycemic-index dietary carbohydrate in type 2 diabetes: no effect on glycated hemoglobin but reduction in C-reactive protein. *Am J Clin Nutr* 2008;**87**(1):114-25
57. Sabate J, Fraser GE, Burke K, et al. Effects of walnuts on serum lipid levels and blood pressure in normal men. *N Engl J Med* 1993;**328**(9):603-7
58. Jenkins DJ, Kendall CW, Marchie A, et al. Dose response of almonds on coronary heart disease risk factors: blood lipids, oxidized low-density lipoproteins, lipoprotein(a),

1  
2  
3 homocysteine, and pulmonary nitric oxide: a randomized, controlled, crossover trial.  
4  
5 Circulation 2002;**106**(11):1327-32  
6  
7

- 8 59. Mozaffarian D, Hao T, Rimm EB, et al. Changes in diet and lifestyle and long-term weight  
9 gain in women and men. The New England journal of medicine 2011;**364**(25):2392-404  
10  
11 doi: 10.1056/NEJMoa1014296[published Online First: Epub Date].  
12  
13  
14  
15  
16  
17  
18  
19  
20  
21  
22  
23  
24  
25  
26  
27  
28  
29  
30  
31  
32  
33  
34  
35  
36  
37  
38  
39  
40  
41  
42  
43  
44  
45  
46  
47  
48  
49  
50  
51  
52  
53  
54  
55  
56  
57  
58  
59  
60

For peer review only

## Figure Legends

Figure 1: Patient Flow Diagram.

Figure 2: Weight loss during the study on both diets.

Figure 3: Mean (A) LDL-C, (B) HDL-C, (C) TC:HDL-C, (D) apolipoprotein B (apoB) and (E) apolipoprotein A1 (apoA1), (F) ApoB:ApoA1 ratio between the two treatments during the metabolic and ad libitum phases.

**Table 1: Baseline Characteristics for Those Who Started the 6-Month Self-Selected Diets (n=39)**

|                                          | <b>High-carbohydrate (n=19)</b> | <b>Low-Carbohydrate (n=20)</b> |
|------------------------------------------|---------------------------------|--------------------------------|
| Age (y)                                  | 55.3 ± 1.8                      | 57.6 ± 1.4                     |
| Males/Females                            | 6/13                            | 9/11                           |
| Body Weight, kg                          | 85.4 [79.3, 91.6]               | 83.7 [78.5, 89.0]              |
| Body Mass Index, kg/m <sup>2</sup>       | 31.1 [29.9, 32.4]               | 31.1 [29.8, 32.4]              |
| Blood Pressure, mm Hg                    |                                 |                                |
| Systolic                                 | 122 [116, 128]                  | 128 [123, 132]                 |
| Diastolic                                | 75 [72, 79]                     | 77 [74, 80]                    |
| Cholesterol, mmol/L                      |                                 |                                |
| Total                                    | 6.75 [6.28, 7.21]               | 6.76 [6.21, 7.31]              |
| LDL-C                                    | 4.40 [3.99, 4.82]               | 4.53 [4.14, 4.93]              |
| HDL-C                                    | 1.36 [1.22, 1.50]               | 1.21 [1.06, 1.36]              |
| Triglycerides, mmol/L                    | 2.16 [1.62, 2.70]               | 2.23 [1.65, 2.80]              |
| Ratios                                   |                                 |                                |
| TC:HDL-C                                 | 5.17 [4.54, 5.80]               | 5.81 [5.20, 6.41]              |
| LDL-C: HDL-C                             | 3.35 [2.95, 3.75]               | 3.89 [3.49, 4.29]              |
| Medications                              |                                 |                                |
| Lipid lowering (prior to start of study) | 4                               | 7                              |
| Blood pressure                           | 3                               | 6                              |
| Diabetes                                 | 0                               | 0                              |
| Thyroid                                  | 2                               | 1                              |

Values represent mean ± SEM or 95% confidence intervals (CIs).

No significant differences between treatments at baseline assessed by two sample t-test (two-tailed).

Table 2: Nutritional Profiles on the High and Low Carbohydrate Diets (n=39)

|                                                     | High Carbohydrate   |                         | Low Carbohydrate    |                         | Between-Treatment Difference <sup>c</sup> | P-value <sup>d</sup> |
|-----------------------------------------------------|---------------------|-------------------------|---------------------|-------------------------|-------------------------------------------|----------------------|
|                                                     | Week 0 <sup>b</sup> | Ad Libitum <sup>b</sup> | Week 0 <sup>b</sup> | Ad Libitum <sup>b</sup> |                                           |                      |
| Calories (kcal)                                     | 1598 [1421, 1775]   | 1347 [1140, 1553]       | 1840 [1550, 2130]   | 1388 [1234, 1541]       | -248 [-391, -106]                         | 0.001                |
| % of Total Calories                                 |                     |                         |                     |                         |                                           |                      |
| Available Carbohydrate                              | 46.3 [42.2, 50.4]   | 53.9 [50.2, 57.5]       | 43.8 [40.2, 47.4]   | 39.6 [35.7, 43.6]       | -10.5 [-13.6, -7.5]                       | < 0.001              |
| Protein                                             | 20.6 [18.7, 22.5]   | 18.4 [17.4, 19.5]       | 20.1 [18.0, 22.2]   | 22.7 [20.1, 25.4]       | 5.9 [4.3, 7.5]                            | < 0.001              |
| Vegetable Protein                                   | 5.6 [5.0, 6.1]      | 6.7 [6.1, 7.3]          | 5.7 [5.3, 6.1]      | 15.0 [11.7, 18.2]       | 8.2 [6.5, 9.9]                            | < 0.001              |
| Soy Protein                                         | 0 [0, 0]            | 0.2 [0.1, 0.2]          | 0 [0, 0]            | 4.7 [2.7, 6.8]          | 3.6 [2.9, 4.4]                            | < 0.001              |
| Fat                                                 | 30.8 [27.3, 34.4]   | 27.5 [24.6, 30.4]       | 34.4 [31.4, 37.5]   | 36.0 [31.5, 40.5]       | 5.2 [2.6, 7.7]                            | < 0.001              |
| Saturated                                           | 10.8 [9.1, 12.6]    | 7.6 [6.2, 8.9]          | 11.8 [10.3, 13.3]   | 7.5 [6.6, 8.4]          | -0.4 [-1.4, 0.6]                          | 0.401                |
| Monounsaturated                                     | 12.3 [10.7, 13.8]   | 10.4 [9.3, 11.6]        | 13.0 [11.9, 14.2]   | 14.8 [13.1, 16.6]       | 4.6 [3.1, 6.1]                            | < 0.001              |
| Polyunsaturated*                                    | 5.2 [4.6, 5.8]      | 6.3 [5.4, 7.2]          | 6.6 [5.5, 7.8]      | 8.4 [7.5, 9.4]          | 0.4 [-0.5, 1.4]                           | 0.350                |
| Alcohol                                             | 2.2 [0.3, 4.2]      | 1.9 [0.7, 3.2]          | 1.6 [0.0, 3.3]      | 1.1 [0.1, 2.1]          | -0.5 [-1.3, 0.2]                          | 0.160                |
| Dietary Fibre (g/1000 kcal)                         | 10.9 [9.2, 12.5]    | 18.2 [15.2, 21.1]       | 12.1 [9.9, 14.4]    | 21.3 [18.8, 23.8]       | 1.5 [-0.5, 3.5]                           | 0.127                |
| Dietary Cholesterol (mg/1000 kcal)                  | 149 [129, 169]      | 87 [61, 113]            | 157 [136, 177]      | 117 [44, 189]           | 11 [-22, 23]                              | 0.954                |
| Adherence with "Eco-Atkins" Components <sup>a</sup> |                     |                         |                     |                         |                                           |                      |
| Viscous Fiber (out of 33.3%)                        | ---                 | ---                     | ---                 | 14.0 [9.4, 18.6]        | ---                                       | ---                  |
| Vegetable Protein (soy and gluten) (out of 33.3%)   | ---                 | ---                     | ---                 | 14.7 [10.3, 19.1]       | ---                                       | ---                  |
| Nuts (out of 33.3%)                                 | ---                 | ---                     | ---                 | 6.3 [3.3, 9.3]          | ---                                       | ---                  |
| Total Adherence (out of 100%)                       | ---                 | ---                     | ---                 | 33.6 [22.1, 45.2]       | ---                                       | ---                  |

Values represent mean  $\pm$  95% confidence intervals (CIs).

<sup>a</sup>Adherence represents the mean percentage intake of the prescribed intake of the 3 cholesterol-lowering components [viscous fiber, vegetable protein (soy and gluten), nuts] by expressing the recorded intake for each component as 33.3%. The sum of the 3 components if consumed as prescribed would equal 100% adherence.

<sup>b</sup>Values represent multiple imputation (taking the mean of 5 sets of randomly imputed values) to generate data for those who dropped out or had missing values.

<sup>c</sup>Between Treatment Difference = Change from baseline between the two diets using all available data.

<sup>d</sup>P-values assessed using all available data and a repeated measures mixed model accounting for time of assessment. The response variable was change from baseline, with diet and week as fixed effects and subject ID nested in diet. There was no adjustment for baseline.

\*Significantly different between treatments at baseline assessed by two sample t-test (two tailed), P=0.025.



Table 3: Effect of high and low carbohydrate diets on body weight, blood lipids, apolipoproteins and 10-yr CHD risk (n=39)

|                                   | High Carbohydrate   |                         | Low Carbohydrate    |                         | Between Treatment Difference <sup>b</sup> | P-value <sup>c</sup> |
|-----------------------------------|---------------------|-------------------------|---------------------|-------------------------|-------------------------------------------|----------------------|
|                                   | Week 0 <sup>a</sup> | Ad Libitum <sup>a</sup> | Week 0 <sup>a</sup> | Ad Libitum <sup>a</sup> |                                           |                      |
| Body Weight, kg                   | 85.4 [79.3, 91.6]   | 80.4 [74.2, 86.6]       | 83.7 [78.5, 89.0]   | 76.9 [71.9, 81.9]       | -1.1 [-2.1, 0.0]                          | 0.047                |
| BMI                               | 31.1 [29.9, 32.4]   | 29.2 [27.9, 30.5]       | 31.1 [29.8, 32.4]   | 28.7 [27.3, 30.1]       | -0.4 [-0.8, 0.0]                          | 0.039                |
| Body Fat, %                       | 38.9 [34.0, 43.8]   | 35.0 [30.7, 39.2]       | 35.6 [30.1, 41.1]   | 31.4 [26.1, 36.6]       | -1.7 [-4.0, 0.7]                          | 0.161                |
| Waist Circumference (cm)          | 102.8 [99.4, 106.2] | 97.4 [93.1, 101.6]      | 99.8 [96.1, 103.5]  | 93.7 [89.8, 97.7]       | 0.1 [-1.1, 1.3]                           | 0.861                |
| Fasting Glucose                   | 5.2 [4.9, 5.4]      | 4.6 [4.5, 4.7]          | 5.2 [5.0, 5.4]      | 4.6 [4.4, 4.9]          | 0.1 [-0.1, 0.2]                           | 0.447                |
| HbA1c (%)                         | 5.2 [5.0, 5.4]      | 5.2 [5.0, 5.3]          | 5.3 [5.0, 5.5]      | 5.2 [5.0, 5.4]          | 0.0 [-0.2, 0.1]                           | 0.852                |
| Fasting Insulin                   | 50.0 [38.3, 61.7]   | 36.4 [27.5, 45.4]       | 47.3 [36.9, 57.6]   | 33.3 [22.8, 43.9]       | -0.6 [-9.1, 8.0]                          | 0.898                |
| HOMA-IR                           | 1.65 [1.17, 2.13]   | 1.11 [0.81, 1.41]       | 1.53 [1.19, 1.88]   | 0.99 [0.68, 1.30]       | 0.01 [-0.30, 0.33]                        | 0.937                |
| Satiety (-4 to 4)                 | 1.0 [0.7, 1.4]      | 0.9 [0.7, 1.2]          | 1.2 [0.8, 1.7]      | 1.1 [0.8, 1.4]          | -0.1 [-0.4, 0.2]                          | 0.440                |
| Exercise, METs                    | 17.4 [12.4, 22.4]   | 25.8 [21.1, 30.6]       | 24.0 [12.9, 35.0]   | 23.9 [15.3, 32.6]       | -9.3 [-16.4, -2-2]                        | 0.012                |
| Cholesterol, mmol/L <sup>†</sup>  |                     |                         |                     |                         |                                           |                      |
| Total                             | 6.75 [6.28, 7.21]   | 6.49 [5.97, 7.02]       | 6.76 [6.21, 7.31]   | 6.10 [5.67, 6.53]       | -0.62 [-0.86, -0.37]                      | <0.001               |
| LDL-C                             | 4.40 [3.99, 4.82]   | 4.40 [3.91, 4.90]       | 4.53 [4.14, 4.93]   | 4.06 [3.71, 4.42]       | -0.49 [-0.70, -0.28]                      | <0.001               |
| HDL-C                             | 1.36 [1.22, 1.50]   | 1.35 [1.22, 1.48]       | 1.21 [1.06, 1.36]   | 1.25 [1.10, 1.39]       | 0.03 [-0.02, 0.07]                        | 0.245                |
| Triglycerides                     | 2.16 [1.62, 2.70]   | 1.71 [1.35, 2.07]       | 2.23 [1.65, 2.80]   | 1.50 [1.22, 1.77]       | -0.34 [-0.57, -0.11]                      | 0.005                |
| Ratios                            |                     |                         |                     |                         |                                           |                      |
| Tchol:HDL-C                       | 5.17 [4.54, 5.80]   | 4.92 [4.49, 5.34]       | 5.81 [5.20, 6.41]   | 5.13 [4.65, 5.62]       | -0.57 [-0.83, -0.32]                      | <0.001               |
| LDL-C:HDL-C                       | 3.35 [2.95, 3.75]   | 3.34 [3.00, 3.68]       | 3.89 [3.49, 4.29]   | 3.48 [3.06, 3.90]       | -0.42 [-0.60, -0.24]                      | <0.002               |
| Apolipoproteins, g/L <sup>‡</sup> |                     |                         |                     |                         |                                           |                      |
| Apo A1                            | 1.69 [1.60, 1.78]   | 1.69 [1.60, 1.77]       | 1.57 [1.45, 1.69]   | 1.57 [1.46, 1.67]       | -0.02 [-0.06, 0.02]                       | 0.316                |
| Apo B                             | 1.38 [1.26, 1.50]   | 1.23 [1.13, 1.33]       | 1.42 [1.30, 1.54]   | 1.20 [1.10, 1.31]       | -0.11 [-0.16, -0.06]                      | <0.001               |
| Apo B: Apo A1                     | 0.83 [0.74, 0.91]   | 0.74 [0.68, 0.80]       | 0.92 [0.84, 0.99]   | 0.78 [0.70, 0.86]       | -0.05 [-0.09, -0.02]                      | 0.003                |
| hs-CRP, mg/dL                     | 2.1 [1.0, 3.3]      | 1.9 [1.3, 2.4]          | 3.0 [1.5, 4.5]      | 2.6 [1.0, 4.1]          | -0.4 [-0.9, 0.1]                          | 0.082                |

|                      |                |                |  |                |                |  |                       |
|----------------------|----------------|----------------|--|----------------|----------------|--|-----------------------|
| Blood Pressure, mmHg |                |                |  |                |                |  |                       |
| Systolic             | 122 [116, 128] | 118 [114, 122] |  | 128 [123, 132] | 123 [119, 128] |  | -2 [-5, 2]<br>0.356   |
| Diastolic            | 75 [72, 79]    | 74 [71, 77]    |  | 77 [74, 80]    | 76 [71, 80]    |  | -1 [-3, 1]<br>0.288   |
| 10-yr CHD risk (%)*  | 8 [6, 9]       | 7 [6, 9]       |  | 12 [9, 14]     | 9 [7, 11]      |  | -2 [-2, -1]<br><0.001 |

Values represent mean  $\pm$  95% confidence intervals (CIs).

†To convert total cholesterol, LDL-C, and HDL-C to mg/dL, divide by 0.0259; to convert triglycerides to mg/dL, divide by 0.0113.

‡To convert apolipoprotein A1 and B to mg/dL, multiply by 100.

<sup>a</sup>Values represent multiple imputation (taking the mean of 5 sets of randomly imputed values) to generate data for those who dropped out or had missing values.

<sup>b</sup>Between Treatment Difference = Change from baseline between the two diets using all available data.

<sup>c</sup>P-values assessed using all available data and a repeated measures mixed model accounting for time of assessment. The response variable was change from baseline, with diet and week as fixed effects and subject ID nested in diet. There was no adjustment for baseline.

\*Significantly different between treatments at baseline assessed by two sample t-test (two tailed), P=0.007.

Figure 1

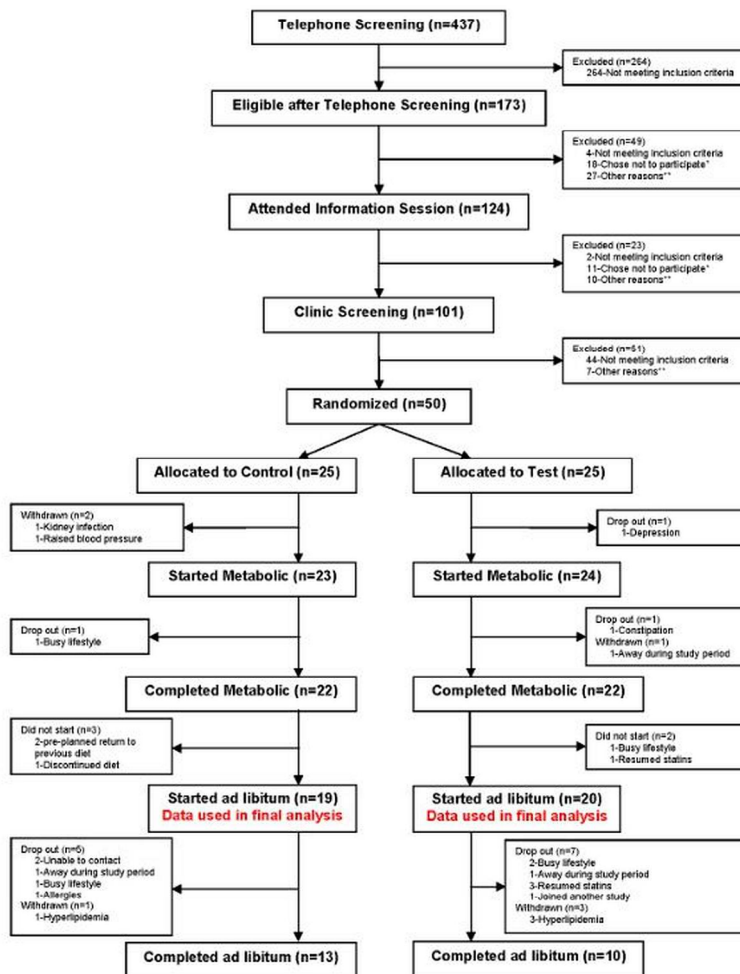

\*Chose not to participate (29): busy lifestyle (13), not interested (6), study too demanding (3), currently on another diet (2), no compensation (2), work-related (2), dislike prepackaged foods (1)

\*\*Other reasons (44): unable to contact (19), unable to come to clinic (13), away (5), throat surgery (1), bowel resection (1), high potassium and BP (1), high potassium (1), raised liver function tests (1), not interested (1), medical insurance issue (1)

180x239mm (300 x 300 DPI)

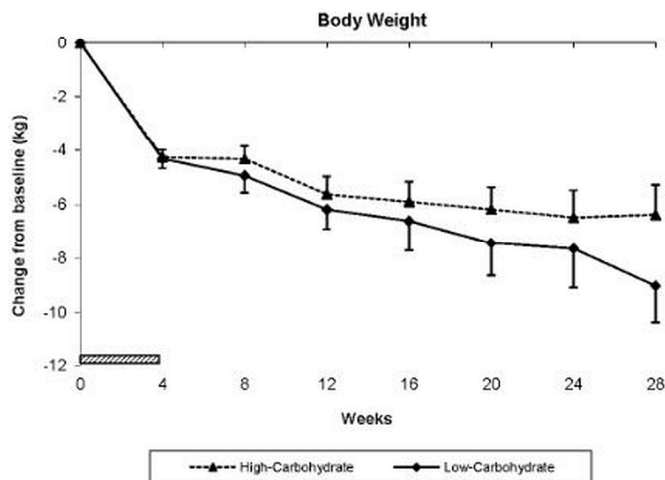

Figure 2: Weight loss during the study on both diets. Values represent mean  $\pm$  SEM of the change from baseline during the metabolic and ad libitum phases, using multiple imputation (taking the mean of 5 sets of randomly imputed values) to generate data for those who dropped out or had missing values on the ad libitum phase.

The change in weight during the ad libitum phase was significantly reduced ( $P=0.047$ ) on the low versus the high carbohydrate diet using all available data in the repeated measures mixed model analysis.

▨ Represents the metabolic phase.

171x190mm (300 x 300 DPI)

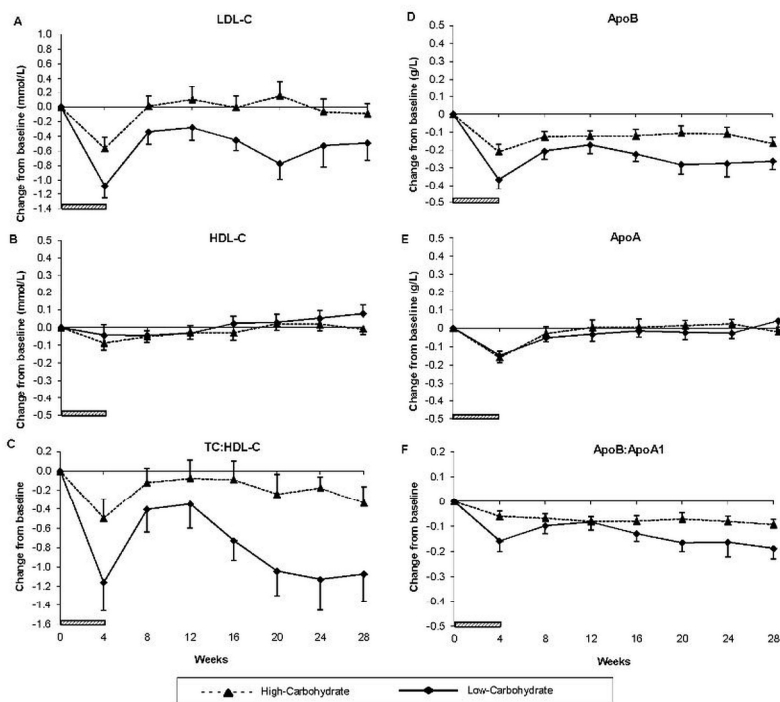

Figure 3 Change in (A) LDL-C, (B) HDL-C, (C) TC:HDL-C, (D) Apolipoprotein B (apoB), (E) Apolipoprotein A1 (apoA1), (F) ApoB:ApoA1 ratio between the two treatment groups during the metabolic and ad libitum phases. Values represent mean  $\pm$  SEM of the change from baseline using multiple imputation (taking the mean of 5 sets of randomly imputed values) to generate data for those who dropped out or had missing values for the ad libitum phase. Significant treatment differences were seen for LDL-C ( $P < 0.001$ ), apo B ( $P < 0.001$ ) and the ratios TC:HDL-C ( $P < 0.001$ ) and apoB:apoA1 ( $p = 0.003$ ) using all available data in the repeated measures mixed model analysis during the ad libitum phase.

▨ Represents the metabolic phase.

277x228mm (300 x 300 DPI)



## CONSORT 2010 checklist of information to include when reporting a randomised trial\*

| Section/Topic             | Item No | Checklist item                                                                                                                        | Reported on page No                                           |
|---------------------------|---------|---------------------------------------------------------------------------------------------------------------------------------------|---------------------------------------------------------------|
| <b>Title and abstract</b> |         |                                                                                                                                       |                                                               |
|                           | 1a      | Identification as a randomised trial in the title                                                                                     | 1                                                             |
|                           | 1b      | Structured summary of trial design, methods, results, and conclusions (for specific guidance see CONSORT for abstracts)               | 5-6                                                           |
| <b>Introduction</b>       |         |                                                                                                                                       |                                                               |
| Background and objectives | 2a      | Scientific background and explanation of rationale                                                                                    | 7-8                                                           |
|                           | 2b      | Specific objectives or hypotheses                                                                                                     | 8                                                             |
| <b>Methods</b>            |         |                                                                                                                                       |                                                               |
| Trial design              | 3a      | Description of trial design (such as parallel, factorial) including allocation ratio                                                  | 9                                                             |
|                           | 3b      | Important changes to methods after trial commencement (such as eligibility criteria), with reasons                                    | NA                                                            |
| Participants              | 4a      | Eligibility criteria for participants                                                                                                 | 8, also previously published from results of metabolic phase  |
|                           | 4b      | Settings and locations where the data were collected                                                                                  | 8                                                             |
| Interventions             | 5       | The interventions for each group with sufficient details to allow replication, including how and when they were actually administered | 9-11                                                          |
| Outcomes                  | 6a      | Completely defined pre-specified primary and secondary outcome measures, including how and when they were assessed                    | 11-12                                                         |
|                           | 6b      | Any changes to trial outcomes after the trial commenced, with reasons                                                                 | NA                                                            |
| Sample size               | 7a      | How sample size was determined                                                                                                        | Continuation with ad libitum phase, metabolic phase published |

1  
2  
3  
4  
5  
6  
7  
8  
9  
10  
11  
12  
13  
14  
15  
16  
17  
18  
19  
20  
21  
22  
23  
24  
25  
26  
27  
28  
29  
30  
31  
32  
33  
34  
35  
36  
37  
38  
39  
40  
41  
42  
43  
44  
45  
46  
47  
48  
49

Randomisation:  
Sequence  
generation

7b When applicable, explanation of any interim analyses and stopping guidelines

NA

8a Method used to generate the random allocation sequence

Continuation  
with ad libitum  
phase,  
randomized  
metabolic  
phase  
published

8b Type of randomisation; details of any restriction (such as blocking and block size)

Continuation  
with ad libitum  
phase,  
randomized  
metabolic  
phase  
published

Allocation  
concealment  
mechanism

9 Mechanism used to implement the random allocation sequence (such as sequentially numbered containers), describing any steps taken to conceal the sequence until interventions were assigned

Continuation  
with ad libitum  
phase,  
randomized  
metabolic  
phase  
published

Implementation

10 Who generated the random allocation sequence, who enrolled participants, and who assigned participants to interventions

Continuation  
with ad libitum  
phase,  
randomized  
metabolic  
phase  
published

Blinding

11a If done, who was blinded after assignment to interventions (for example, participants, care providers, those assessing outcomes) and how

11

11b If relevant, description of the similarity of interventions

NA

|    |                                                      |     |                                                                                                                                                   |                                                                                                                                                                    |
|----|------------------------------------------------------|-----|---------------------------------------------------------------------------------------------------------------------------------------------------|--------------------------------------------------------------------------------------------------------------------------------------------------------------------|
| 1  |                                                      |     |                                                                                                                                                   |                                                                                                                                                                    |
| 2  | Statistical methods                                  | 12a | Statistical methods used to compare groups for primary and secondary outcomes                                                                     | <u>12-13</u>                                                                                                                                                       |
| 3  |                                                      | 12b | Methods for additional analyses, such as subgroup analyses and adjusted analyses                                                                  | <u>12-13</u>                                                                                                                                                       |
| 4  |                                                      |     |                                                                                                                                                   |                                                                                                                                                                    |
| 5  | <b>Results</b>                                       |     |                                                                                                                                                   |                                                                                                                                                                    |
| 6  | Participant flow (a diagram is strongly recommended) | 13a | For each group, the numbers of participants who were randomly assigned, received intended treatment, and were analysed for the primary outcome    | Figure 1, CONSORT Diagram                                                                                                                                          |
| 7  |                                                      | 13b | For each group, losses and exclusions after randomisation, together with reasons                                                                  | Figure 1, CONSORT Diagram                                                                                                                                          |
| 8  |                                                      |     |                                                                                                                                                   |                                                                                                                                                                    |
| 9  | Recruitment                                          | 14a | Dates defining the periods of recruitment and follow-up                                                                                           | 8                                                                                                                                                                  |
| 10 |                                                      | 14b | Why the trial ended or was stopped                                                                                                                | NA                                                                                                                                                                 |
| 11 |                                                      |     |                                                                                                                                                   |                                                                                                                                                                    |
| 12 | Baseline data                                        | 15  | A table showing baseline demographic and clinical characteristics for each group                                                                  | Table 1                                                                                                                                                            |
| 13 | Numbers analysed                                     | 16  | For each group, number of participants (denominator) included in each analysis and whether the analysis was by original assigned groups           | 12                                                                                                                                                                 |
| 14 | Outcomes and estimation                              | 17a | For each primary and secondary outcome, results for each group, and the estimated effect size and its precision (such as 95% confidence interval) | 13-15, Table 3, Figure 2 & 3                                                                                                                                       |
| 15 |                                                      | 17b | For binary outcomes, presentation of both absolute and relative effect sizes is recommended                                                       | Relative effect sizes are given in Results 13-15 and Tables 2 & 3. The absolute differences from each treatment can be derived from Table 2 & 3 and Figures 2 & 3. |
| 16 |                                                      |     |                                                                                                                                                   |                                                                                                                                                                    |
| 17 | Ancillary analyses                                   | 18  | Results of any other analyses performed, including subgroup analyses and adjusted analyses, distinguishing pre-specified from exploratory         | 13-15                                                                                                                                                              |
| 18 |                                                      |     |                                                                                                                                                   |                                                                                                                                                                    |
| 19 |                                                      |     |                                                                                                                                                   |                                                                                                                                                                    |
| 20 |                                                      |     |                                                                                                                                                   |                                                                                                                                                                    |
| 21 |                                                      |     |                                                                                                                                                   |                                                                                                                                                                    |
| 22 |                                                      |     |                                                                                                                                                   |                                                                                                                                                                    |
| 23 |                                                      |     |                                                                                                                                                   |                                                                                                                                                                    |
| 24 |                                                      |     |                                                                                                                                                   |                                                                                                                                                                    |
| 25 |                                                      |     |                                                                                                                                                   |                                                                                                                                                                    |
| 26 |                                                      |     |                                                                                                                                                   |                                                                                                                                                                    |
| 27 |                                                      |     |                                                                                                                                                   |                                                                                                                                                                    |
| 28 |                                                      |     |                                                                                                                                                   |                                                                                                                                                                    |
| 29 |                                                      |     |                                                                                                                                                   |                                                                                                                                                                    |
| 30 |                                                      |     |                                                                                                                                                   |                                                                                                                                                                    |
| 31 |                                                      |     |                                                                                                                                                   |                                                                                                                                                                    |
| 32 |                                                      |     |                                                                                                                                                   |                                                                                                                                                                    |
| 33 |                                                      |     |                                                                                                                                                   |                                                                                                                                                                    |
| 34 |                                                      |     |                                                                                                                                                   |                                                                                                                                                                    |
| 35 |                                                      |     |                                                                                                                                                   |                                                                                                                                                                    |
| 36 |                                                      |     |                                                                                                                                                   |                                                                                                                                                                    |
| 37 |                                                      |     |                                                                                                                                                   |                                                                                                                                                                    |
| 38 |                                                      |     |                                                                                                                                                   |                                                                                                                                                                    |
| 39 |                                                      |     |                                                                                                                                                   |                                                                                                                                                                    |
| 40 |                                                      |     |                                                                                                                                                   |                                                                                                                                                                    |
| 41 |                                                      |     |                                                                                                                                                   |                                                                                                                                                                    |
| 42 |                                                      |     |                                                                                                                                                   |                                                                                                                                                                    |
| 43 |                                                      |     |                                                                                                                                                   |                                                                                                                                                                    |



1  
2  
3  
4  
5  
6  
7  
8  
9  
10  
11  
12  
13  
14  
15  
16  
17  
18  
19  
20  
21  
22  
23  
24  
25  
26  
27  
28  
29  
30  
31  
32  
33  
34  
35  
36  
37  
38  
39  
40  
41  
42  
43  
44  
45  
46  
47  
48  
49

|                          |    |                                                                                                                  |       |
|--------------------------|----|------------------------------------------------------------------------------------------------------------------|-------|
| Harms                    | 19 | All important harms or unintended effects in each group (for specific guidance see CONSORT for harms)            | 15    |
| <b>Discussion</b>        |    |                                                                                                                  |       |
| Limitations              | 20 | Trial limitations, addressing sources of potential bias, imprecision, and, if relevant, multiplicity of analyses | 18    |
| Generalisability         | 21 | Generalisability (external validity, applicability) of the trial findings                                        | 15-19 |
| Interpretation           | 22 | Interpretation consistent with results, balancing benefits and harms, and considering other relevant evidence    | 15-19 |
| <b>Other information</b> |    |                                                                                                                  |       |
| Registration             | 23 | Registration number and name of trial registry                                                                   | 2     |
| Protocol                 | 24 | Where the full trial protocol can be accessed, if available                                                      | 2     |
| Funding                  | 25 | Sources of funding and other support (such as supply of drugs), role of funders                                  | 2, 20 |

\*We strongly recommend reading this statement in conjunction with the CONSORT 2010 Explanation and Elaboration for important clarifications on all the items. If relevant, we also recommend reading CONSORT extensions for cluster randomised trials, non-inferiority and equivalence trials, non-pharmacological treatments, herbal interventions, and pragmatic trials. Additional extensions are forthcoming: for those and for up to date references relevant to this checklist, see [www.consort-statement.org](http://www.consort-statement.org).
